# Supplementary material for: Anticancer activity of Ni(ii) and Zn(ii) complexes based on new unsymmetrical salophen-type ligands: synthesis, characterization and single-crystal X-ray diffraction
Source: Royal Society of Chemistry journal article supplement (doi:10.1039/d3dt00800b), 2023-01-01

## Electronic Supporting Information

a

David Villaman,<sup>\*a</sup> Andrés Vega,<sup>b</sup> Lucía Santa María de la Parra,<sup>c</sup> Ignacio E. León,<sup>c,d</sup> Pedro Levín,<sup>e</sup> Patricia M. Toro<sup>\*f</sup>

<sup>a</sup> Laboratorio de Química Inorgánica y Organometálica, Facultad de Cs. Química, Universidad de Concepción, Chile.

<sup>b</sup> Universidad Andrés Bello, Facultad de Ciencias Exactas, Departamento de Ciencias Químicas, Av. República 498, Santiago, Chile.

<sup>c</sup> CEQUINOR (UNLP, CCT-CONICET La Plata, Asociado a CIC), Departamento de Química, Facultad de Ciencias Exactas, Universidad Nacional de La Plata. Blvd. 120 N° 1465, La Plata 1900, Argentina;

<sup>d</sup> Cátedra de Fisiopatología, Departamento de Ciencias Biológicas, Facultad de Ciencias Exactas, Universidad Nacional de La Plata. 47 y 115, La Plata 1900, Argentina

<sup>e</sup> Departamento de Química de los Materiales, Facultad de Química y Biología, Universidad de Santiago de Chile, Av. Libertador Bernardo O'Higgins 3363, Estación Central, Santiago, Chile.

<sup>f</sup> Instituto de Ciencias Aplicadas, Facultad de Ingeniería, Universidad Autónoma de Chile, Talca, Chile.

\*Corresponding author

E-mail addresses: [dvillaman@udec.cl](mailto:dvillaman@udec.cl) (D. Villaman), and [patricia.toro@uautonoma.cl](mailto:patricia.toro@uautonoma.cl) (P. M. Toro).

**(66 pages)**

**Contents**

## 1. Supplementary Tables

**Table S1.** Summary of experimental ultraviolet-visible spectroscopic data: position of the main bands detected [wavelengths  $\lambda_i$  (nm)] and logarithms of their molar extinction coefficients [ $\log \epsilon_i$  ( $\epsilon_i$  in  $M^{-1} \text{ cm}^{-1}$ )] for compounds  $\text{Ni}^{\text{II}}\text{-L}^1$ ,  $\text{Ni}^{\text{II}}\text{-L}^2$ ,  $\text{Zn}^{\text{II}}\text{-L}^1$  and  $\text{Zn}^{\text{II}}\text{-L}^2$ .

**Table S2.** Crystallographic data for  $\text{H}_2\text{L}^1$  and  $\text{H}_2\text{L}^2$ .

**Table S3.** Crystallographic data for  $\text{Ni}^{\text{II}}\text{-L}^1$  and  $\text{Ni}^{\text{II}}\text{-L}^2$ .

**Table S4.** Bond lengths [ $\text{\AA}$ ] and angles [ $^\circ$ ] for  $\text{H}_2\text{L}^1$ .

**Table S5.** Bond lengths [ $\text{\AA}$ ] and angles [ $^\circ$ ] for  $\text{H}_2\text{L}^2$ .

**Table S6.** Intramolecular and intermolecular hydrogen bonds for  $\text{H}_2\text{L}^1$ .

**Table S7.** Intramolecular and intermolecular hydrogen bonds for  $\text{H}_2\text{L}^2$ .

**Table S8.** Bond lengths [ $\text{\AA}$ ] and angles [ $^\circ$ ] for  $\text{Ni}^{\text{II}}\text{-L}^1$ .

**Table S9.** Intermolecular hydrogen bonds for  $\text{Ni}^{\text{II}}\text{-L}^1$ .

**Table S10.** Bond lengths [ $\text{\AA}$ ] and angles [ $^\circ$ ] for  $\text{Ni}^{\text{II}}\text{-L}^2$ .

**Table S11.** Intermolecular hydrogen bonds for  $\text{Ni}^{\text{II}}\text{-L}^2$ .

## 2. Supplementary Figures

**Figure S1.** High resolution mass spectrum (HRMS) of compound  $\text{H}_2\text{L}^1$  asymmetric ligand. The peak at  $m/z$  353.1497 corresponds to  $[\text{M} + \text{H}]^+$ .

**Figure S2.** High resolution mass spectrum (HRMS) of compound  $\text{H}_2\text{L}^2$  asymmetric ligand. The peak at  $m/z$  405.1532 corresponds to  $[\text{M} + \text{Na}]^+$ .

**Figure S3.** High resolution mass spectrum (HRMS) of compound  $\text{Ni}^{\text{II}}\text{-L}^1$  asymmetric ligand. The peak at 409.0930  $m/z$  corresponds to  $[\text{M} + \text{H}]^+$ .

**Figure S4.** High resolution mass spectrum (HRMS) of compound  $\text{Zn}^{\text{II}}\text{-L}^1$  asymmetric ligand. The peak at  $m/z$  415.0630 corresponds to  $[\text{M}]^+$ .

**Figure S5.** High resolution mass spectrum (HRMS) of compound  $\text{Ni}^{\text{II}}\text{-L}^2$  asymmetric ligand. The peak at  $m/z$  439.0803 corresponds to  $[\text{M} + \text{H}]^+$ .

**Figure S6.** High resolution mass spectrum (HRMS) of compound  $\text{Zn}^{\text{II}}\text{-L}^2$  asymmetric ligand. The peak at  $m/z$  445.0740 corresponds to  $[\text{M}]^+$ .

**Figure S7.** FT-IR spectrum of 2-hydroxy-5-methoxybenzaldehyde in KBr disc.

**Figure S8.** FT-IR spectrum of salicylaldehyde in KBr disc.

**Figure S9.** FT-IR spectrum of *o*-phenylenediamine in KBr disc.

**Figure S10.** FT-IR spectrum of ethyl-2-(ethoxymethylene)acetoacetate in KBr disc.

**Figure S11.** FT-IR spectrum of compound  $\mathbf{H_2L^1}$  in KBr disc.

**Figure S12.** FT-IR spectrum of compound  $\mathbf{H_2L^1}$  in KBr disc.

**Figure S13.** FT-IR spectrum of compound  $\mathbf{Ni^{II}-L^1}$  in KBr disc.

**Figure S14.** FT-IR spectrum of compound  $\mathbf{Zn^{II}-L^1}$  in KBr disc.

**Figure S15.** FT-IR spectrum of compound  $\mathbf{Ni^{II}-L^2}$  in KBr disc.

**Figure S16.** FT-IR spectrum of compound  $\mathbf{Zn^{II}-L^2}$  in KBr disc.

**Figure S17.** (a)  $^1\text{H}$  NMR spectrum (400 MHz) of compound  $\mathbf{H_2L^1}$  in  $\text{CDCl}_3$ ; (b) zoom-in of the aromatic region of the  $^1\text{H}$  NMR spectrum of  $\mathbf{H_2L^1}$ .

**Figure S18.** (a)  $^1\text{H}$  NMR spectrum (400 MHz) of compound  $\mathbf{H_2L^2}$  in  $\text{CDCl}_3$ ; (b) zoom-in of the aromatic region of the  $^1\text{H}$  NMR spectrum of  $\mathbf{H_2L^2}$ .

**Figure S19.** (a)  $^1\text{H}$  NMR spectrum (400 MHz) of compound  $\mathbf{Ni^{II}-L^1}$  in  $\text{CDCl}_3$ ; (b) zoom-in of the aromatic region of the  $^1\text{H}$  NMR spectrum of  $\mathbf{Ni^{II}-L^1}$ .

**Figure S20.** (a)  $^1\text{H}$  NMR spectrum (400 MHz) of compound  $\mathbf{Zn^{II}-L^1}$  in  $\text{CDCl}_3$ ; (b) zoom-in of the aromatic region of the  $^1\text{H}$  NMR spectrum of  $\mathbf{Zn^{II}-L^1}$ .

**Figure S21.** (a)  $^1\text{H}$  NMR spectrum (400 MHz) of compound  $\mathbf{Ni^{II}-L^2}$  in  $\text{CDCl}_3$ ; (b) zoom-in of the aromatic region of the  $^1\text{H}$  NMR spectrum of  $\mathbf{Ni^{II}-L^2}$ .

**Figure S22.** (a)  $^1\text{H}$  NMR spectrum (400 MHz) of compound  $\mathbf{Zn^{II}-L^2}$  in  $\text{CDCl}_3$ ; (b) zoom-in of the aromatic region of the  $^1\text{H}$  NMR spectrum of  $\mathbf{Zn^{II}-L^2}$ .

**Figure S23.**  $^{13}\text{C}$  NMR spectrum (400 MHz) of compound  $\mathbf{H_2L^1}$  in  $\text{CDCl}_3$ .

**Figure S24.**  $^{13}\text{C}$  NMR spectrum (400 MHz) of compound  $\mathbf{H_2L^2}$  in  $\text{CDCl}_3$ .

**Figure S25.**  $^{13}\text{C}$  NMR spectrum (400 MHz) of compound  $\mathbf{Ni^{II}-L^1}$  in  $\text{CDCl}_3$ .

**Figure S26.**  $^{13}\text{C}$  NMR spectrum (400 MHz) of compound  $\mathbf{Zn^{II}-L^1}$  in  $\text{CDCl}_3$ .

**Figure S27.**  $^{13}\text{C}$  NMR spectrum (400 MHz) of compound  $\mathbf{Ni^{II}-L^2}$  in  $\text{CDCl}_3$ .

**Figure S28.**  $^{13}\text{C}$  NMR spectrum (400 MHz) of compound  $\mathbf{Zn^{II}-L^2}$  in  $\text{CDCl}_3$ .

**Figure S29.** [ $^1\text{H}$ - $^1\text{H}$ ] NOESY NMR spectrum (400 MHz) of compound  $\mathbf{Ni^{II}-L^1}$  in  $\text{CDCl}_3$ . The NOESY spectrum of  $\mathbf{Ni^{II}-L^1}$  shows the interaction between hydrogen at 8.19 ppm with two hydrogens atoms from aromatic region which is consistent with the assignation of the signal at 8.19 as imine group ( $\text{CH}=\text{N}$ ).

**Figure S30.**  $^1\text{H}$  NMR spectra of compound  $\text{H}_2\text{L}^1$  at different periods of storage (0, 4, 12, 24 and 48 h) in  $\text{DMSO-}d_6\text{:D}_2\text{O}$  solution (9:1) at 300 K.

**Figure S31.**  $^1\text{H}$  NMR spectra of compound  $\text{H}_2\text{L}^2$  at different periods of storage (0, 4, 12, 24 and 48 h) in  $\text{DMSO-}d_6\text{:D}_2\text{O}$  solution (9:1) at 300 K.

**Figure S32.**  $^1\text{H}$  NMR spectra of compound  $\text{Ni}^{\text{II}}\text{-L}^1$  at different periods of storage (0, 1, 4, 12, and 24 h) in  $\text{DMSO-}d_6\text{:D}_2\text{O}$  solution (9:1) at 300 K.

**Figure S33.**  $^1\text{H}$  NMR spectra of compound  $\text{Zn}^{\text{II}}\text{-L}^1$  at different periods of storage (0, 4, 12, 24 and 48 h) in  $\text{DMSO-}d_6\text{:D}_2\text{O}$  solution (9:1) at 300 K.

**Figure S34.**  $^1\text{H}$  NMR spectra of compound  $\text{Ni}^{\text{II}}\text{-L}^2$  at different periods of storage (0, 4, 12, 24 and 48 h) in  $\text{DMSO-}d_6\text{:D}_2\text{O}$  solution (9:1) at 300 K.

**Figure S35.**  $^1\text{H}$  NMR spectra of compound  $\text{Zn}^{\text{II}}\text{-L}^2$  at different periods of storage (0, 1, 4, 12, and 24 h) in  $\text{DMSO-}d_6\text{:D}_2\text{O}$  solution (9:1) at 300 K.

**Figure S36.** The absorption spectrum of a freshly prepared solution of  $\text{Ni}^{\text{II}}\text{-L}_1$  in a  $\text{DMSO:Buffer}$  solution (60:40) and absorption spectral changes after several storage periods. **A)** Contains spectra registered every 3 h, up to 24 h, and in order to ease the visualization, **B)** contains a selection of the spectra obtained for  $t = 0, 12,$  and 24 h.

**Figure S37.** The absorption spectrum of a freshly prepared solution of  $\text{Ni}^{\text{II}}\text{-L}_2$  in a  $\text{DMSO:Buffer}$  solution (60:40) and absorption spectral changes after several storage periods. **A)** Contains spectra registered every 3 h, up to 24 h, and in order to ease the visualization, **B)** contains a selection of the spectra obtained for  $t = 0, 12,$  and 24 h.

**Figure S38.** The absorption spectrum of a freshly prepared solution of  $\text{Zn}^{\text{II}}\text{-L}_1$  in a  $\text{DMSO:Buffer}$  solution (60:40) and absorption spectral changes after several storage periods. **A)** Contains spectra registered every 3 h, up to 24 h, and in order to ease the visualization, **B)** contains a selection of the spectra obtained for  $t = 0, 12,$  and 24 h.

**Figure S39.** The absorption spectrum of a freshly prepared solution of  $\text{Zn}^{\text{II}}\text{-L}_2$  in a  $\text{DMSO:Buffer}$  solution (60:40) and absorption spectral changes after several storage periods. **A)** Contains spectra registered every 3 h, up to 24 h, and in order to ease the visualization, **B)** contains a selection of the spectra obtained for  $t = 0, 12,$  and 24 h.

**Figure S40.** Intermolecular hydrogen bonds  $\text{C5-H5}\cdots\text{O3}$  and  $\text{C7-H7}\cdots\text{O3}$  of compound  $\text{Ni}^{\text{II}}\text{-L}^1$ .

**Figure S41.** Intermolecular bifurcated hydrogen bond C19-H19A $\cdots$ O1 and C19-H19A $\cdots$ O2 of compound Ni<sup>II</sup>-L<sup>1</sup>.

**Figure S42.** Intermolecular hydrogen bonds C21-H21C $\cdots$ O5 of compound Ni<sup>II</sup>-L<sup>2</sup>.

**Figure S43.** Intermolecular hydrogen bonds C19-H19B $\cdots$ O1 of compound Ni<sup>II</sup>-L<sup>2</sup>.

**Figure S44.** Cell viability assay on MG-63, HCT-116 and MDA-MB-231 cells after 24 of incubation with ligands (**H<sub>2</sub>L<sup>1</sup>** and **H<sub>2</sub>L<sup>2</sup>**), Ni(II) complexes (**Ni<sup>II</sup>-L<sup>1</sup>** and **Ni<sup>II</sup>-L<sup>2</sup>**) and Zn(II) complexes compound (**Zn<sup>II</sup>-L<sup>1</sup>** and **Zn<sup>II</sup>-L<sup>2</sup>**). The results are expressed as the percentage of the basal level and represent the mean  $\pm$  the standard error of the mean (SEM) (n = 18). Asterisk significant difference in comparison with the basal level (p <0.01).

## Contents

### 1. Supplementary Tables

**Table S1.** Summary of experimental ultraviolet-visible spectroscopic data: position of the main bands detected [wavelengths  $\lambda_i$  (nm)] and logarithms of their molar extinction coefficients [ $\log \epsilon_i$  ( $\epsilon_i$  in  $M^{-1} \text{ cm}^{-1}$ )] for compounds **Ni<sup>II</sup>-L<sup>1</sup>**, **Ni<sup>II</sup>-L<sup>2</sup>**, **Zn<sup>II</sup>-L<sup>1</sup>** and **Zn<sup>II</sup>-L<sup>2</sup>**.

|                                   | Compounds <sup>a</sup>               |                                      |                                      |                                      |
|-----------------------------------|--------------------------------------|--------------------------------------|--------------------------------------|--------------------------------------|
|                                   | <b>Ni<sup>II</sup>-L<sup>1</sup></b> | <b>Ni<sup>II</sup>-L<sup>2</sup></b> | <b>Zn<sup>II</sup>-L<sup>1</sup></b> | <b>Zn<sup>II</sup>-L<sup>2</sup></b> |
| $\lambda_1$ ( $\log \epsilon_1$ ) | 353 (6.5)                            | 357 (6.5)                            | 353 (6.5)                            | 358 (6.6)                            |
| $\lambda_2$ ( $\log \epsilon_2$ ) | 416 to 491 <sup>b</sup>              | 424 (6.6)<br>482 (6.7)               | 405 to 474 <sup>b</sup>              | 439 (6.6)                            |

<sup>a</sup>Data obtained from the spectra recorded from fresh solutions of the compounds ( $t = 0$  h).

<sup>b</sup>In this case the band is rather broad (see Figs. S36 and S37) and the position of the maximum cannot be determined accurately.

**Table S2.** Crystallographic data for **H<sub>2</sub>L<sup>1</sup>** and **H<sub>2</sub>L<sup>2</sup>**.

|                                             | <b>H<sub>2</sub>L<sup>1</sup></b>                             | <b>H<sub>2</sub>L<sup>2</sup></b>                             |
|---------------------------------------------|---------------------------------------------------------------|---------------------------------------------------------------|
| <b>Empirical formula</b>                    | C <sub>20</sub> H <sub>20</sub> N <sub>2</sub> O <sub>4</sub> | C <sub>21</sub> H <sub>22</sub> N <sub>2</sub> O <sub>5</sub> |
| <b>Formula weight</b>                       | 352.38                                                        | 382.40                                                        |
| <b>T (K)</b>                                | 296.15                                                        | 296.15                                                        |
| <b>λ (Å)</b>                                | 0.71073                                                       | 0.71073                                                       |
| <b>Crystal system</b>                       | monoclinic                                                    | orthorhombic                                                  |
| <b>Space group</b>                          | <i>P2<sub>1</sub>/c</i>                                       | <i>Pbca</i>                                                   |
| <b>a (Å)</b>                                | 11.9709(6)                                                    | 22.8904(11)                                                   |
| <b>b (Å)</b>                                | 11.5289(5)                                                    | 14.1561(6)                                                    |
| <b>c (Å)</b>                                | 14.3295(7)                                                    | 24.2635(13)                                                   |
| <b>α (°)</b>                                | 90                                                            | 90                                                            |
| <b>β (°)</b>                                | 112.951(2)                                                    | 90                                                            |
| <b>γ (°)</b>                                | 90                                                            | 90                                                            |
| <b>V (Å<sup>3</sup>)</b>                    | 1821.08(15)                                                   | 7862.3(7)                                                     |
| <b>Z</b>                                    | 4                                                             | 16                                                            |
| <b>ρ<sub>calc</sub> (g cm<sup>-3</sup>)</b> | 1.285                                                         | 1.292                                                         |
| <b>μ (mm<sup>-1</sup>)</b>                  | 0.090                                                         | 0.093                                                         |
| <b>F(000)</b>                               | 744.0                                                         | 3232.0                                                        |
| <b>Crystal size (mm<sup>3</sup>)</b>        | 0.25 × 0.24 × 0.049                                           | 0.24 × 0.21 × 0.19                                            |
| <b>2θ range (°)</b>                         | From 4.692 to 64.212                                          | From 4.576 to 56.676                                          |
| <b>Index ranges</b>                         | -17 ≤ h ≤ 15<br>-17 ≤ k ≤ 17<br>-20 ≤ l ≤ 21                  | -30 ≤ h ≤ 26<br>-18 ≤ k ≤ 15<br>-28 ≤ l ≤ 32                  |
| <b>Reflections collected</b>                | 36211                                                         | 51082                                                         |
| <b>Independent reflections</b>              | 6359 [R <sub>int</sub> = 0.0494]                              | 9795 [R <sub>int</sub> = 0.0565]                              |
| <b>Data/restraints/paramet</b>              | 6359/238                                                      | 9795/7/524                                                    |
| <b>Goodness-of-fit on F<sup>2</sup></b>     | 1.031                                                         | 1.002                                                         |
| <b>Final R indices [I &gt; 2σ(I)]</b>       | R <sub>1</sub> = 0.0546, wR <sub>2</sub> = 0.1596             | R <sub>1</sub> = 0.0579, wR <sub>2</sub> = 0.1485             |
| <b>R indices (all data)</b>                 | R <sub>1</sub> = 0.0855, wR <sub>2</sub> = 0.1849             | R <sub>1</sub> = 0.1167, wR <sub>2</sub> = 0.1876             |

**Table S3.** Crystallographic data for Ni<sup>II</sup>-L<sup>1</sup> and Ni<sup>II</sup>-L<sup>2</sup>.

|                                                            | Ni <sup>II</sup> -L <sup>1</sup>                                  | Ni <sup>II</sup> -L <sup>2</sup>                                  |
|------------------------------------------------------------|-------------------------------------------------------------------|-------------------------------------------------------------------|
| <b>Empirical formula</b>                                   | C <sub>20</sub> H <sub>18</sub> N <sub>2</sub> NiO <sub>4</sub>   | C <sub>21</sub> H <sub>20</sub> N <sub>2</sub> NiO <sub>5</sub>   |
| <b>Formula weight</b>                                      | 409.07                                                            | 439.10                                                            |
| <b>T (K)</b>                                               | 296.15                                                            | 296.15                                                            |
| <b>λ (Å)</b>                                               | 0.71073                                                           | 0.71073                                                           |
| <b>Crystal system</b>                                      | monoclinic                                                        | Triclinic                                                         |
| <b>Space group</b>                                         | <i>P</i> 2 <sub>1</sub> / <i>c</i>                                | <i>P</i> -1                                                       |
| <b><i>a</i> (Å)</b>                                        | 11.2066(7)                                                        | 8.142(5)                                                          |
| <b><i>b</i> (Å)</b>                                        | 11.7649(9)                                                        | 10.284(5)                                                         |
| <b><i>c</i> (Å)</b>                                        | 13.5458(10)                                                       | 11.733(6)                                                         |
| <b>α (°)</b>                                               | 90                                                                | 90.098(16)                                                        |
| <b>β (°)</b>                                               | 102.150(3)                                                        | 93.951(16)                                                        |
| <b>γ (°)</b>                                               | 90                                                                | 100.460(12)                                                       |
| <b>V (Å<sup>3</sup>)</b>                                   | 1745.9(2)                                                         | 963.8(9)                                                          |
| <b>Z</b>                                                   | 4                                                                 | 2                                                                 |
| <b>ρ<sub>calc</sub> (g cm<sup>-3</sup>)</b>                | 1.556                                                             | 1.513                                                             |
| <b>μ (mm<sup>-1</sup>)</b>                                 | 1.141                                                             | 1.043                                                             |
| <b>F(000)</b>                                              | 848.0                                                             | 456.0                                                             |
| <b>Crystal size (mm<sup>3</sup>)</b>                       | 0.2 × 0.097 × 0.049                                               | 0.3 × 0.16 × 0.054                                                |
| <b>2θ range (°)</b>                                        | From 4.632 to 66.492                                              | From 5.362 to 61.902                                              |
| <b>Index ranges</b>                                        | -17 ≤ <i>h</i> ≤ 16<br>-18 ≤ <i>k</i> ≤ 18<br>-20 ≤ <i>l</i> ≤ 20 | -11 ≤ <i>h</i> ≤ 11<br>-14 ≤ <i>k</i> ≤ 14<br>-16 ≤ <i>l</i> ≤ 16 |
| <b>Reflections collected</b>                               | 36870                                                             | 33528                                                             |
| <b>Independent reflections</b>                             | 6680 [R <sub>int</sub> = 0.0642]                                  | 6042 [R <sub>int</sub> = 0.0551]                                  |
| <b>Data/parameters</b>                                     | 6680/246                                                          | 6042/265                                                          |
| <b>Goodness-of-fit on <i>F</i><sup>2</sup></b>             | 1.014                                                             | 1.090                                                             |
| <b>Final <i>R</i> indices [<i>I</i> &gt; 2σ(<i>I</i>)]</b> | R <sub>1</sub> = 0.0439, wR <sub>2</sub> = 0.1017                 | R <sub>1</sub> = 0.0436, wR <sub>2</sub> = 0.1134                 |
| <b><i>R</i> indices (all data)</b>                         | R <sub>1</sub> = 0.0727, wR <sub>2</sub> = 0.1156                 | R <sub>1</sub> = 0.0689, wR <sub>2</sub> = 0.1347                 |



**Table S4.** Bond lengths [Å] and angles [°] for **H<sub>2</sub>L<sup>1</sup>**.

| <b>Atoms</b>      | <b>Length/Å</b> | <b>Atoms</b>       | <b>Length/Å</b> |
|-------------------|-----------------|--------------------|-----------------|
| <b>O1-C1</b>      | 1.343(2)        | <b>C5-C6</b>       | 1.399(2)        |
| <b>O2-C16</b>     | 1.2422(17)      | <b>C6-C7</b>       | 1.4490(19)      |
| <b>O3-C18</b>     | 1.2052(16)      | <b>C8-C9</b>       | 1.3912(17)      |
| <b>O4-C18</b>     | 1.3417(17)      | <b>C8-C13</b>      | 1.4009(18)      |
| <b>O4-C19</b>     | 1.4358(19)      | <b>C9-C10</b>      | 1.378(2)        |
| <b>N1-C7</b>      | 1.2839(18)      | <b>C10-C11</b>     | 1.378(2)        |
| <b>N1-C8</b>      | 1.4148(16)      | <b>C11-C12</b>     | 1.383(2)        |
| <b>N2-C13</b>     | 1.4015(15)      | <b>C12-C13</b>     | 1.3906(18)      |
| <b>N2-C14</b>     | 1.3234(17)      | <b>C14-C15</b>     | 1.3839(17)      |
| <b>C1-C2</b>      | 1.390(2)        | <b>C15-C16</b>     | 1.4529(19)      |
| <b>C1-C6</b>      | 1.402(2)        | <b>C15-C18</b>     | 1.4685(18)      |
| <b>C2-C3</b>      | 1.377(3)        | <b>C16-C17</b>     | 1.492(2)        |
| <b>C3-C4</b>      | 1.373(3)        | <b>C19-C20</b>     | 1.481(3)        |
| <b>C4-C5</b>      | 1.375(2)        |                    |                 |
|                   |                 |                    |                 |
| <b>Atoms</b>      | <b>Angles/°</b> | <b>Atoms</b>       | <b>Angles/°</b> |
| <b>C18-O4-C19</b> | 117.01(12)      | <b>C9-C10-C11</b>  | 119.72(13)      |
| <b>C7-N1-C8</b>   | 118.30(11)      | <b>C10-C11-C12</b> | 120.53(13)      |
| <b>C14-N2-C13</b> | 127.34(12)      | <b>C11-C12-C13</b> | 120.04(14)      |
| <b>O1-C1-C2</b>   | 118.22(15)      | <b>C8-C13-N2</b>   | 117.55(11)      |
| <b>O1-C1-C6</b>   | 122.42(14)      | <b>C12-C13-N2</b>  | 122.72(12)      |
| <b>C2-C1-C6</b>   | 119.36(16)      | <b>C12-C13-C8</b>  | 119.73(11)      |
| <b>C3-C2-C1</b>   | 120.41(18)      | <b>N2-C14-C15</b>  | 124.86(13)      |
| <b>C4-C3-C2</b>   | 120.75(17)      | <b>C14-C15-C16</b> | 120.31(12)      |
| <b>C3-C4-C5</b>   | 119.69(18)      | <b>C14-C15-C18</b> | 117.87(12)      |
| <b>C4-C5-C6</b>   | 120.94(17)      | <b>C16-C15-C18</b> | 121.82(11)      |
| <b>C1-C6-C7</b>   | 122.57(14)      | <b>O2-C16-C15</b>  | 120.34(12)      |
| <b>C5-C6-C1</b>   | 118.82(14)      | <b>O2-C16-C17</b>  | 117.85(13)      |
| <b>C5-C6-C7</b>   | 118.60(13)      | <b>C15-C16-C17</b> | 121.78(13)      |
| <b>N1-C7-C6</b>   | 123.67(12)      | <b>O3-C18-O4</b>   | 121.57(13)      |
| <b>C9-C8-N1</b>   | 122.83(12)      | <b>O3-C18-C15</b>  | 126.21(13)      |
| <b>C9-C8-C13</b>  | 118.93(12)      | <b>O4-C18-C15</b>  | 112.20(11)      |
| <b>C13-C8-N1</b>  | 118.20(11)      | <b>O4-C19-C20</b>  | 108.68(16)      |
| <b>C10-C9-C8</b>  | 121.02(14)      |                    |                 |

**Table S5.** Bond lengths [Å] and angles [°] for H<sub>2</sub>L<sup>2</sup>.

| <b>Atoms</b>         | <b>Length/Å</b> | <b>Atoms</b>         | <b>Length/Å</b> |
|----------------------|-----------------|----------------------|-----------------|
| <b>O1A-C1A</b>       | 1.359(3)        | <b>O1B-C1B</b>       | 1.356(3)        |
| <b>O2A-C16A</b>      | 1.241(3)        | <b>O2B-C16B</b>      | 1.241(3)        |
| <b>O3A-C18A</b>      | 1.204(3)        | <b>O3B-C18B</b>      | 1.196(3)        |
| <b>O4A-C18A</b>      | 1.319(4)        | <b>O4B-C18B</b>      | 1.329(3)        |
| <b>O4A-C19A</b>      | 1.462(3)        | <b>O4B-C19B</b>      | 1.451(3)        |
| <b>O5A-C4A</b>       | 1.370(3)        | <b>O5B-C4B</b>       | 1.376(3)        |
| <b>O5A-C4A</b>       | 1.413(4)        | <b>O5B-C21B</b>      | 1.403(4)        |
| <b>N1A-C7A</b>       | 1.284(3)        | <b>N1B-C7B</b>       | 1.287(3)        |
| <b>N1A-C8A</b>       | 1.420(3)        | <b>N1B-C8B</b>       | 1.419(3)        |
| <b>N2A-C13A</b>      | 1.406(2)        | <b>N2B-C13B</b>      | 1.403(3)        |
| <b>N2A-C14A</b>      | 1.327(2)        | <b>N2B-C14B</b>      | 1.328(2)        |
| <b>C1A-C2A</b>       | 1.384(3)        | <b>C1B-C2B</b>       | 1.389(4)        |
| <b>C1A-C6A</b>       | 1.391(3)        | <b>C1B-C6B</b>       | 1.386(3)        |
| <b>C2A-C3A</b>       | 1.360(4)        | <b>C2B-C3B</b>       | 1.365(4)        |
| <b>C3A-C4A</b>       | 1.381(3)        | <b>C3B-C4B</b>       | 1.369(4)        |
| <b>C4A-C5A</b>       | 1.367(3)        | <b>C4B-C5B</b>       | 1.365(3)        |
| <b>C5A-C6A</b>       | 1.408(3)        | <b>C5B-C6B</b>       | 1.404(3)        |
| <b>C6A-C7A</b>       | 1.440(3)        | <b>C6B-C7B</b>       | 1.445(3)        |
| <b>C8A-C9A</b>       | 1.389(3)        | <b>C8B-C9B</b>       | 1.385(3)        |
| <b>C8A-C13A</b>      | 1.395(3)        | <b>C8B-C13B</b>      | 1.397(3)        |
| <b>C9A-C10A</b>      | 1.377(3)        | <b>C9B-C10B</b>      | 1.382(3)        |
| <b>C10A-C11A</b>     | 1.371(3)        | <b>C10B-C11B</b>     | 1.371(3)        |
| <b>C11A-C12A</b>     | 1.369(3)        | <b>C11B-C12B</b>     | 1.368(3)        |
| <b>C12A-C13A</b>     | 1.389(3)        | <b>C12B-C13B</b>     | 1.387(3)        |
| <b>C14A-C15A</b>     | 1.380(3)        | <b>C14B-C15B</b>     | 1.376(3)        |
| <b>C15A-C16A</b>     | 1.432(4)        | <b>C15B-C16B</b>     | 1.440(4)        |
| <b>C15A-C18A</b>     | 1.466(3)        | <b>C15B-C18B</b>     | 1.464(3)        |
| <b>C16A-C19A</b>     | 1.506(3)        | <b>C16B-C17B</b>     | 1.510(3)        |
| <b>C19A-C20</b>      | 1.427(13)       | <b>C19B-C20B</b>     | 1.468(5)        |
| <b>C19A-C20A</b>     | 1.434(12)       |                      |                 |
|                      |                 |                      |                 |
| <b>Atoms</b>         | <b>Angle/°</b>  | <b>Atoms</b>         | <b>Angle/°</b>  |
| <b>C18A-O4A-C19A</b> | 115.5(3)        | <b>C19B-O4B-C20B</b> | 116.4(2)        |
| <b>C4A-O5A-C21A</b>  | 117.3(2)        | <b>C4B-O5B-C5B</b>   | 117.0(3)        |

|                       |            |                       |            |
|-----------------------|------------|-----------------------|------------|
| <b>C7A-N1A-C8A</b>    | 118.18(17) | <b>C7B-N1B-C8B</b>    | 118.62(18) |
| <b>C14A-N2A-C13A</b>  | 126.75(19) | <b>C14B-N2B-C13B</b>  | 125.9(2)   |
| <b>O1A-C1A-C2A</b>    | 118.6(2)   | <b>O1B-C1B-C2B</b>    | 118.4(2)   |
| <b>O1A-C1A-C6A</b>    | 122.0(2)   | <b>O1B-C1B-C6B</b>    | 122.4(2)   |
| <b>C2A-C1A-C6A</b>    | 119.4(2)   | <b>C6B-C1B-C2B</b>    | 119.1(3)   |
| <b>C3A-C2A-C1A</b>    | 120.6(2)   | <b>C3B-C2B-C1B</b>    | 120.2(3)   |
| <b>C2A-C3A-C4A</b>    | 121.0(2)   | <b>C2B-C3B-C4B</b>    | 121.4(3)   |
| <b>O5A-C4A-C3A</b>    | 115.7(2)   | <b>C3B-C4B-O5B</b>    | 115.6(3)   |
| <b>C5A-C4A-O5A</b>    | 124.8(2)   | <b>C5B-C4B-O5B</b>    | 125.2(3)   |
| <b>C5A-C4A-C3A</b>    | 119.5(2)   | <b>C5B-C4B-C3B</b>    | 119.2(3)   |
| <b>C4A-C5A-C6A</b>    | 120.4(2)   | <b>C4B-C5B-C6B</b>    | 120.8(2)   |
| <b>C1A-C6A-C5A</b>    | 119.1(2)   | <b>C1B-C6B-C5B</b>    | 119.2(2)   |
| <b>C1A-C6A-C7A</b>    | 122.6(2)   | <b>C1B-C6B-C7B</b>    | 122.3(2)   |
| <b>C5A-C6A-C7A</b>    | 118.25(19) | <b>C5B-C6B-C7B</b>    | 118.5(2)   |
| <b>N1A-C7A-C6A</b>    | 123.4(2)   | <b>N1B-C7B-C6B</b>    | 123.6(2)   |
| <b>C9A-C8A-N1A</b>    | 122.60(18) | <b>C9B-C8B-N1B</b>    | 122.20(18) |
| <b>C9A-C8A-C13A</b>   | 119.43(19) | <b>C9B-C8B-C13B</b>   | 119.1(2)   |
| <b>C13A-C8A-N1A</b>   | 117.93(17) | <b>C13B-C8B-N1B</b>   | 118.61(18) |
| <b>C10A-C9A-C8A</b>   | 120.4(2)   | <b>C10B-C9B-C9B</b>   | 120.7(2)   |
| <b>C11A-C10A-C9A</b>  | 119.8(2)   | <b>C11B-C10B-C9B</b>  | 119.7(2)   |
| <b>C12A-C11A-C10A</b> | 120.8(2)   | <b>C12B-C11B-C10B</b> | 120.5(2)   |
| <b>C11A-C12A-C13A</b> | 120.3(2)   | <b>C11B-C12B-C13B</b> | 120.6(2)   |
| <b>C8A-C13A-N2A</b>   | 118.17(18) | <b>C8B-C13B-N2B</b>   | 118.31(19) |
| <b>C12A-C13A-N2A</b>  | 122.58(18) | <b>C12B-C13B-N2B</b>  | 122.34(18) |
| <b>C12A-C13A-C8A</b>  | 119.24(18) | <b>C12B-C13B-C8B</b>  | 119.33(19) |
| <b>N2A-C14A-C15A</b>  | 125.6(2)   | <b>N2B-C14B-C15B</b>  | 126.3(2)   |
| <b>C14A-C15A-C16A</b> | 121.1(2)   | <b>C14B-C15B-C16B</b> | 120.8(2)   |
| <b>C14A-C15A-C18A</b> | 117.4(3)   | <b>C14B-C15B-C18B</b> | 117.4(2)   |
| <b>C16A-C17A-C18A</b> | 121.5(2)   | <b>C16B-C15B-C18B</b> | 121.9(2)   |
| <b>O2A-C16A-C15A</b>  | 120.3(2)   | <b>O2B-C16B-C15B</b>  | 120.1(2)   |
| <b>O2A-C16A-C17A</b>  | 117.3(3)   | <b>O2B-C16B-C17B</b>  | 118.0(3)   |
| <b>C15A-C16A-C17A</b> | 122.4(3)   | <b>C15B-C16B-C17B</b> | 121.9(3)   |
| <b>O3A-C18A-O4A</b>   | 121.3(3)   | <b>O3B-C18B-O4B</b>   | 121.9(3)   |
| <b>O3A-C18A-C15A</b>  | 125.9(3)   | <b>O3B-C18B-C15B</b>  | 126.2(3)   |
| <b>O4A-C18A-C15A</b>  | 112.8(2)   | <b>O4B-C18B-C15B</b>  | 112.0(2)   |
| <b>C20-C19A-O4A</b>   | 106.1(10)  | <b>O4B-C19B-C20B</b>  | 106.7(3)   |
| <b>C20A-C19A-O4A</b>  | 106.9(8)   |                       |            |

**Table S6.** Intramolecular and intermolecular hydrogen bonds for **H<sub>2</sub>L<sup>1</sup>**.

| D-H...A                                                                                  | d(D-H)/Å | d(H-A)/Å | d(D-A)/Å   | D-H-A/° |
|------------------------------------------------------------------------------------------|----------|----------|------------|---------|
| <b>O1-H1...N1</b>                                                                        | 0.82     | 1.98     | 2.7007(15) | 146.1   |
| <b>N2-H2...O2</b>                                                                        | 0.86     | 1.93     | 2.5951(14) | 133.7   |
| <b>C19-H19A...O2<sup>i</sup></b>                                                         | 0.97     | 2.53     | 3.461(3)   | 161.0   |
| <b>C5-H5...O3<sup>ii</sup></b>                                                           | 0.93     | 2.76     | 3.523(2)   | 139.6   |
| <b>C7-H7...O3<sup>ii</sup></b>                                                           | 0.93     | 2.82     | 3.5947(17) | 142.0   |
| <b>C20-H20A...O1<sup>iii</sup></b>                                                       | 0.96     | 2.85     | 3.569(3)   | 132.5   |
| <sup>i</sup> 1-x, -1/2+y, 3/2-z, <sup>ii</sup> +x, 1+y, +z, <sup>iii</sup> 1-x, 1-y, 1-z |          |          |            |         |

**Table S7.** Intramolecular and intermolecular hydrogen bonds for **H<sub>2</sub>L<sup>2</sup>**.

| D-H...A                                                        | d(D-H)/Å | d(H-A)/Å | d(D-A)/Å | D-H-A/° |
|----------------------------------------------------------------|----------|----------|----------|---------|
| <b>O1A-H1A...N1A</b>                                           | 0.82     | 1.97     | 2.678(2) | 143.3   |
| <b>N2A-H2A...O2A</b>                                           | 0.86     | 1.96     | 2.613(2) | 131.8   |
| <b>O1B-H1B...N1B</b>                                           | 0.82     | 1.97     | 2.676(3) | 144.2   |
| <b>N2B-H2B...O2B</b>                                           | 0.86     | 1.97     | 2.617(3) | 130.7   |
| <b>C9A-H9A...O3A<sup>iv</sup></b>                              | 0.93     | 2.39     | 3.283(3) | 160.7   |
| <b>C9A-H9A...O3A<sup>v</sup></b>                               | 0.93     | 2.31     | 3.146(3) | 149.3   |
| <b>C5A-H5A...O2B</b>                                           | 0.93     | 2.44     | 3.338(3) | 162.1   |
| <b>C5B-H5B...O2A</b>                                           | 0.93     | 2.46     | 3.348(3) | 161.0   |
| <sup>iv</sup> -1/2+y, +y, 1/2-z; <sup>v</sup> 1/2+x, +y, 1/2-z |          |          |          |         |

**Table S8.** Bond lengths [Å] and angles [°] for Ni<sup>II</sup>-L<sup>1</sup>.

| <b>Atoms</b> | <b>Length/Å</b> | <b>Atoms</b> | <b>Length/Å</b> |
|--------------|-----------------|--------------|-----------------|
| Ni1-O1       | 1.8479(13)      | C3-C4        | 1.390(3)        |
| Ni1-O2       | 1.8556(12)      | C4-C5        | 1.366(3)        |
| Ni1-N1       | 1.8526(13)      | C5-C6        | 1.412(3)        |
| Ni1-N2       | 1.8461(15)      | C6-C7        | 1.409(2)        |
| O1-C1        | 1.300(2)        | C8-C9        | 1.394(2)        |
| O2-C16       | 1.268(2)        | C8-C13       | 1.396(2)        |
| O3-C18       | 1.213(2)        | C9-C10       | 1.372(3)        |
| O4-C18       | 1.341(3)        | C10-C11      | 1.387(3)        |
| O4-C19       | 1.452(2)        | C11-C12      | 1.383(3)        |
| N1-C7        | 1.305(2)        | C12-C13      | 1.391(3)        |
| N1-C8        | 1.416(2)        | C14-C15      | 1.408(2)        |
| N2-C13       | 1.419(2)        | C15-C16      | 1.414(3)        |
| N2-C14       | 1.310(2)        | C15-C18      | 1.477(2)        |
| C1-C2        | 1.417(3)        | C16-C17      | 1.506(3)        |
| C1-C6        | 1.418(2)        | C19-C20      | 1.492(4)        |
| C2-C3        | 1.369(3)        |              |                 |
|              |                 |              |                 |
| <b>Atoms</b> | <b>Angle/°</b>  | <b>Atoms</b> | <b>Angle/°</b>  |
| O1-Ni1-O2    | 85.54(6)        | C7-C6-C5     | 117.51(17)      |
| O1-Ni1-N1    | 95.41(6)        | N1-C7-C6     | 125.15(16)      |
| N1-Ni1-O2    | 178.97(6)       | C9-C8-N1     | 125.94(16)      |
| N2-Ni1-O1    | 178.44(6)       | C9-C8-C13    | 120.61(17)      |
| N2-Ni1-O2    | 92.98(6)        | C13-C8-N1    | 113.45(15)      |
| N2-Ni1-N1    | 86.07(6)        | C10-C9-C8    | 118.94(18)      |
| C1-O1-Ni1    | 127.02(12)      | C9-C10-C11   | 120.92(19)      |
| C16-O2-Ni1   | 130.58(12)      | C12-C11-C10  | 120.52(19)      |
| C18-O4-C19   | 117.95(16)      | C11-C12-C13  | 119.35(18)      |
| C7-N1-Ni1    | 125.85(13)      | C8-C13-N2    | 113.43(16)      |
| C7-N1-C8     | 120.65(14)      | C12-C13-N2   | 126.90(17)      |
| C8-N1-Ni1    | 113.46(11)      | C12-C13-C8   | 119.66(16)      |
| C13-N2-Ni1   | 113.54(11)      | N2-C14-C15   | 126.65(17)      |
| C14-N2-Ni1   | 125.99(13)      | C14-C15-C16  | 120.53(16)      |
| C14-N2-C13   | 120.46(16)      | C14-C15-C18  | 117.01(17)      |
| O1-C1-C2     | 119.30(17)      | C16-C15-C18  | 122.43(16)      |

|                 |            |                    |            |
|-----------------|------------|--------------------|------------|
| <b>O1-C1-C6</b> | 124.04(17) | <b>O2-C16-C15</b>  | 123.15(16) |
| <b>C2-C1-C6</b> | 116.66(18) | <b>O2-C16-C17</b>  | 114.18(17) |
| <b>C3-C2-C1</b> | 121.7(2)   | <b>C15-C16-C17</b> | 122.66(16) |
| <b>C2-C3-C4</b> | 121.0(2)   | <b>O3-C18-O4</b>   | 121.82(18) |
| <b>C5-C4-C3</b> | 119.3(2)   | <b>O3-C18-C15</b>  | 127.00(19) |
| <b>C4-C5-C6</b> | 121.1(2)   | <b>O4-C18-C15</b>  | 111.17(16) |
| <b>C5-C6-C1</b> | 120.20(18) | <b>O4-C19-C20</b>  | 107.33(19) |
| <b>C7-C6-C1</b> | 122.29(16) |                    |            |

**Table S9.** Intermolecular hydrogen bonds for Ni<sup>II</sup>-L<sup>1</sup>.

| <b>D-H...A</b>                                                                              | <b>d(D-H)/Å</b> | <b>d(H-A)/Å</b> | <b>d(D-A)/Å</b> | <b>D-H-A/°</b> |
|---------------------------------------------------------------------------------------------|-----------------|-----------------|-----------------|----------------|
| <b>C5-H5...O3<sup>vi</sup></b>                                                              | 0.93            | 2.90            | 3.762(3)        | 155.1          |
| <b>C7-H7...O3<sup>vi</sup></b>                                                              | 0.93            | 2.83            | 3.717(2)        | 161.0          |
| <b>C9-H9...O3<sup>vi</sup></b>                                                              | 0.93            | 3.02            | 3.946(3)        | 176.0          |
| <b>C19-H19B...O1<sup>vii</sup></b>                                                          | 0.97            | 2.76            | 3.523(3)        | 136.5          |
| <b>C19-H19A...O1<sup>vii</sup></b>                                                          | 0.97            | 2.92            | 3.799(3)        | 151.7          |
| <b>C19-H19A...O2<sup>viii</sup></b>                                                         | 0.97            | 2.78            | 3.398(3)        | 122.2          |
| <sup>vi</sup> +x, -1+y, +z; <sup>vii</sup> 1-x, 1/2+y, 3/2-z; <sup>viii</sup> 1-x, 1-y, 1-z |                 |                 |                 |                |

**Table S10.** Bond lengths [Å] and angles [°] for Ni<sup>II</sup>-L<sup>2</sup>.

| <b>Atoms</b> | <b>Length/Å</b> | <b>Atoms</b> | <b>Length/Å</b> |
|--------------|-----------------|--------------|-----------------|
| Ni1-O1       | 1.8357(18)      | C2-C3        | 1.364(4)        |
| Ni1-O2       | 1.8594(18)      | C3-C4        | 1.411(4)        |
| Ni1-N1       | 1.8631(19)      | C4-C5        | 1.379(3)        |
| Ni1-N2       | 1.854(2)        | C5-C6        | 1.429(3)        |
| O1-C1        | 1.304(3)        | C6-C7        | 1.424(3)        |
| O2-C16       | 1.271(3)        | C8-C9        | 1.397(3)        |
| O3-C17       | 1.214(3)        | C8-C13       | 1.397(3)        |
| O4-C18       | 1.349(4)        | C9-C10       | 1.397(3)        |
| O4-C19       | 1.460(3)        | C10-C11      | 1.382(4)        |
| O5-C4        | 1.376(3)        | C11-C12      | 1.390(4)        |
| O5-C21       | 1.418(4)        | C12-C13      | 1.401(3)        |
| N1-C7        | 1.298(3)        | C14-C15      | 1.423(3)        |
| N1-C8        | 1.437(3)        | C15-C16      | 1.412(4)        |
| N2-C13       | 1.420(3)        | C15-C18      | 1.477(3)        |
| N2-C14       | 1.313(3)        | C16-C17      | 1.522(3)        |
| C1-C6        | 1.429(3)        | C19-C20      | 1.472(3)        |
|              |                 |              |                 |
| <b>Atoms</b> | <b>Angles/°</b> | <b>Atoms</b> | <b>Angles/°</b> |
| O1-Ni1-O2    | 83.93(8)        | C1-C6-C5     | 119.9(2)        |
| O1-Ni1-N1    | 96.02(8)        | C7-C6-C1     | 121.7(2)        |
| O1-Ni1-N2    | 177.80(8)       | C7-C6-C5     | 118.4(2)        |
| O2-Ni1-N1    | 178.76(7)       | N1-C7-C6     | 125.3(2)        |
| N2-Ni1-O2    | 94.02(8)        | C9-C8-N1     | 126.5(2)        |
| N2-Ni1-N1    | 86.05(8)        | C13-C8-N1    | 112.99(19)      |
| C1-O1-Ni1    | 126.87(15)      | C13-C8-C9    | 120.5(2)        |
| C16-O2-Ni1   | 129.85(16)      | C8-C9-C10    | 119.1(2)        |
| C18-O4-C19   | 116.3(2)        | C11-C10-C9   | 120.6(2)        |
| C4-O5-C21    | 117.4(2)        | C10-C11-C12  | 120.6(2)        |
| C7-N1-Ni1    | 125.67(15)      | C11-C12-C13  | 119.6(2)        |
| C7-N1-C8     | 121.19(19)      | C8-C13-N2    | 114.04(19)      |
| C8-N1-Ni1    | 113.11(14)      | C8-C13-C12   | 119.6(2)        |
| C13-N2-Ni1   | 113.56(15)      | C12-C13-N2   | 126.3(2)        |
| C14-N2-Ni1   | 124.95(16)      | N2-C14-C15   | 126.7(2)        |
| C14-N2-C13   | 121.5(2)        | C14-C15-C18  | 117.9(2)        |
| O1-C1-C2     | 117.7(2)        | C16-C15-C14  | 120.9(2)        |

|                 |          |                    |          |
|-----------------|----------|--------------------|----------|
| <b>O1-C1-C6</b> | 124.4(2) | <b>C16-C15-C18</b> | 121.2(2) |
| <b>C6-C1-C2</b> | 117.8(2) | <b>O2-C16-C15</b>  | 123.3(2) |
| <b>C3-C2-C1</b> | 121.0(2) | <b>O2-C16-C17</b>  | 112.9(2) |
| <b>C2-C3-C4</b> | 121.2(2) | <b>C15-C16-C17</b> | 123.8(2) |
| <b>O5-C4-C3</b> | 114.8(2) | <b>O3-C18-O4</b>   | 122.1(3) |
| <b>O5-C4-C5</b> | 125.2(2) | <b>O3-C18-C15</b>  | 126.2(3) |
| <b>C5-C4-C3</b> | 120.0(2) | <b>O4-C18-C15</b>  | 111.7(2) |
| <b>C4-C5-C6</b> | 120.0(2) | <b>O4-C19-C20</b>  | 108.4(3) |

**Table S11.** Intermolecular hydrogen bonds for Ni<sup>II</sup>-L<sup>2</sup>.

| <b>D-H...A</b>                                         | <b>d(D-H)/Å</b> | <b>d(H-A)/Å</b> | <b>d(D-A)/Å</b> | <b>D-H-A/°</b> |
|--------------------------------------------------------|-----------------|-----------------|-----------------|----------------|
| <b>C21-H21C...O5<sup>ix</sup></b>                      | 0.96            | 2.60            | 3.309(4)        | 131.3          |
| <b>C19-H19B...O1<sup>x</sup></b>                       | 0.97            | 2.71            | 3.541(4)        | 143.8          |
| <sup>ix</sup> 2-x, 2-y, 2-z <sup>x</sup> 1-x, -y, 1-z; |                 |                 |                 |                |



## 2. Supplementary Figures

**Figure S1.** High resolution mass spectrum (HRMS) of compound **H<sub>2</sub>L<sup>1</sup>** asymmetric ligand.

The peak at  $m/z$  353.1497 corresponds to  $[M + H]^+$ .

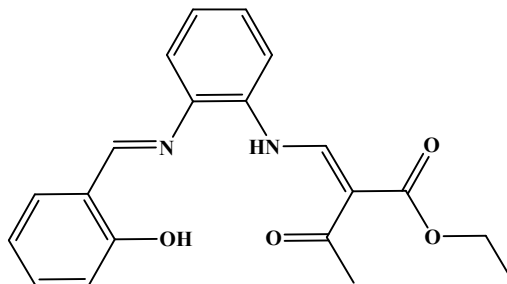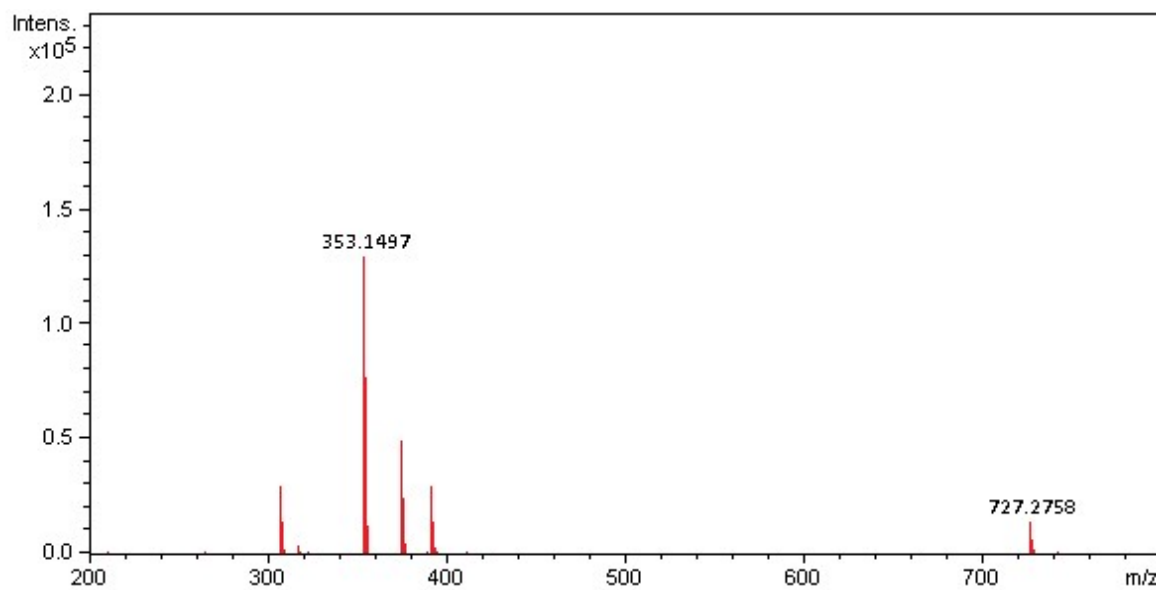

**Figure S2.** High resolution mass spectrum (HRMS) of compound **H<sub>2</sub>L<sup>2</sup>** asymmetric ligand. The peak at  $m/z$  405.1532 corresponds to  $[M + Na]^+$ .

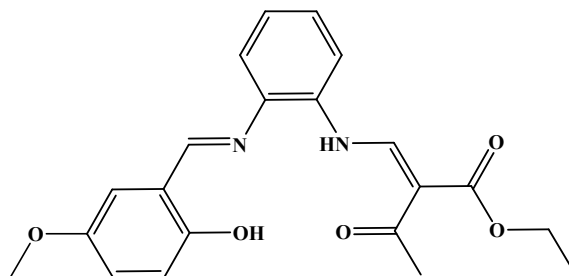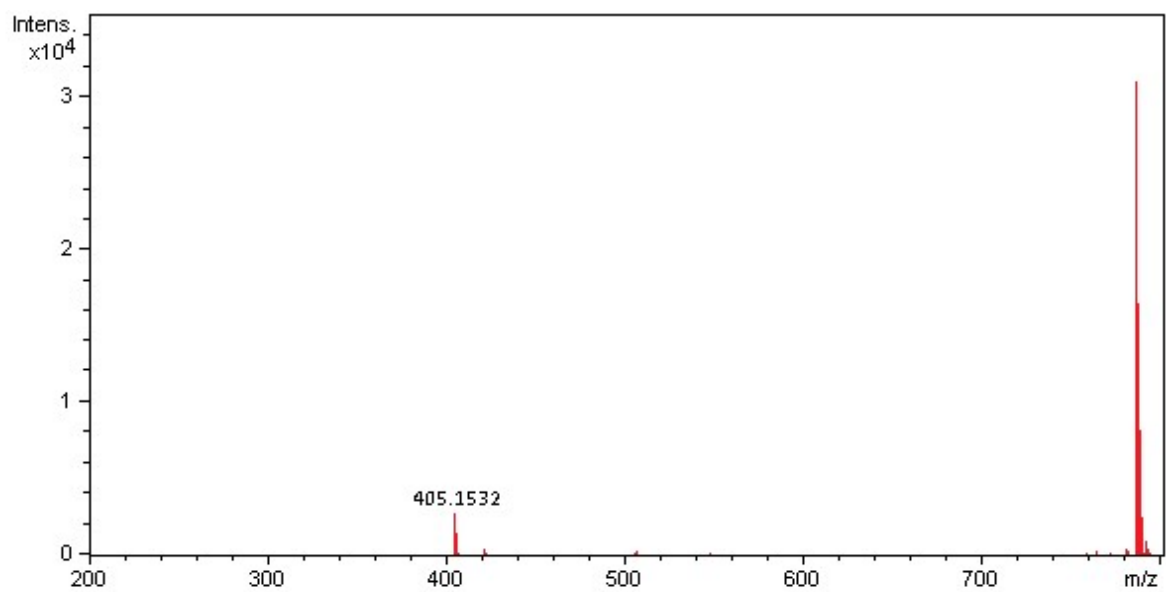

**Figure S3.** High resolution mass spectrum (HRMS) of compound  $\text{Ni}^{\text{II}}\text{-L}^1$  asymmetric ligand. The peak at  $m/z$  409.0930 corresponds to  $[\text{M} + \text{H}]^+$ .

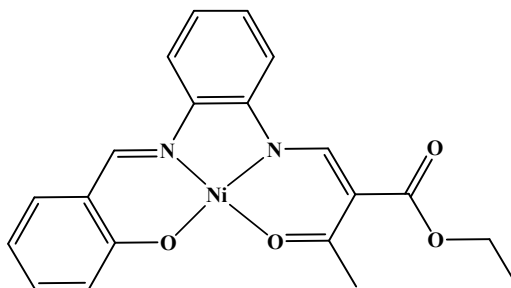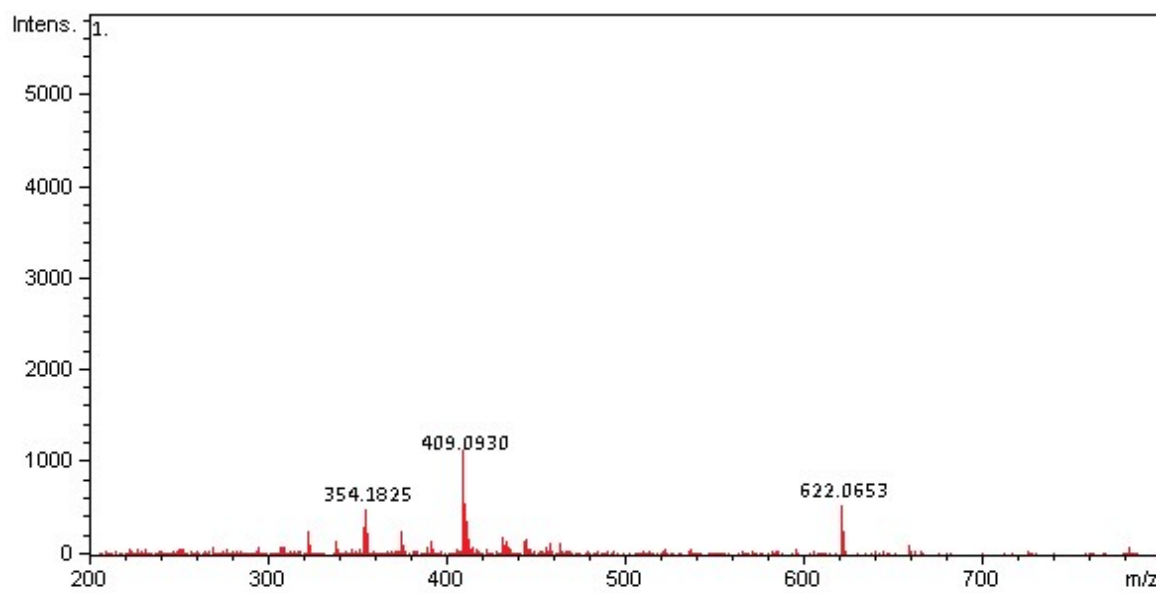

**Figure S4.** High resolution mass spectrum (HRMS) of compound **Zn<sup>II</sup>-L<sup>1</sup>** asymmetric ligand. The peak at  $m/z$  415.0630 corresponds to  $[M]^+$ .

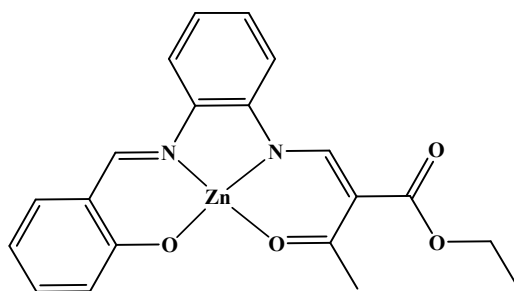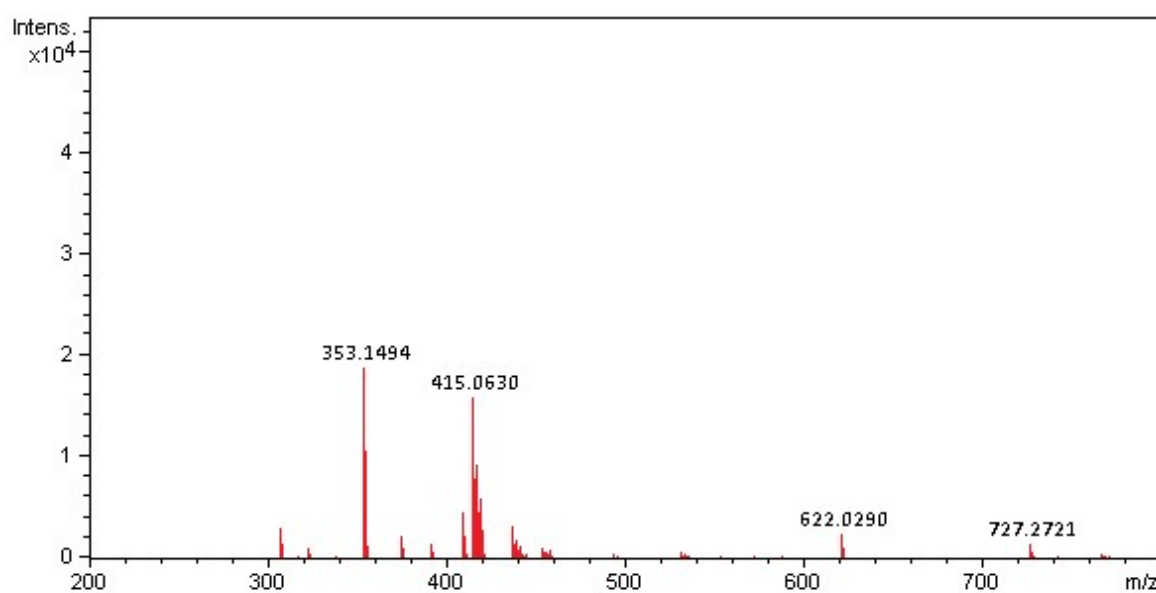

**Figure S5.** High resolution mass spectrum (HRMS) of compound Ni<sup>II</sup>-L<sup>2</sup> asymmetric ligand. The peak at  $m/z$  439.0803 corresponds to [M + H]<sup>+</sup>.

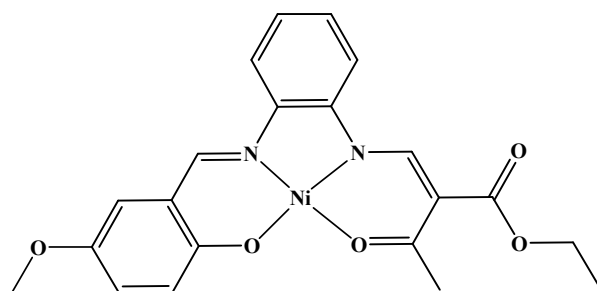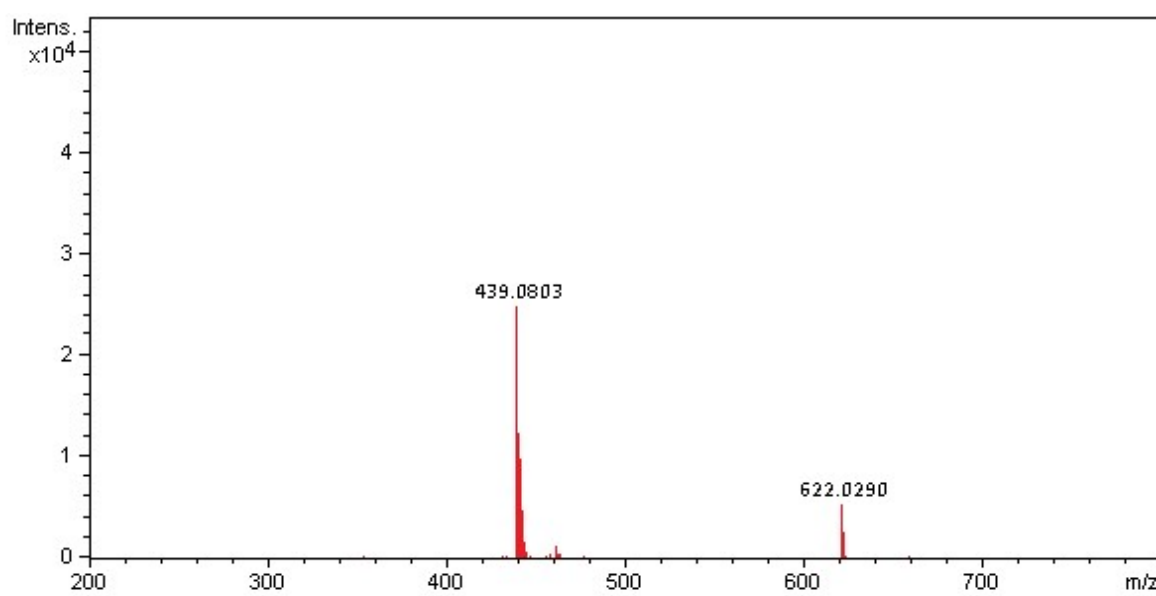

**Figure S6.** High resolution mass spectrum (HRMS) of compound **Zn<sup>II</sup>-L<sup>2</sup>** asymmetric ligand. The peak at  $m/z$  445.0740 corresponds to  $[M]^+$ .

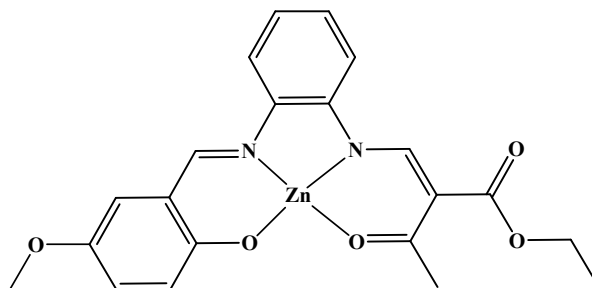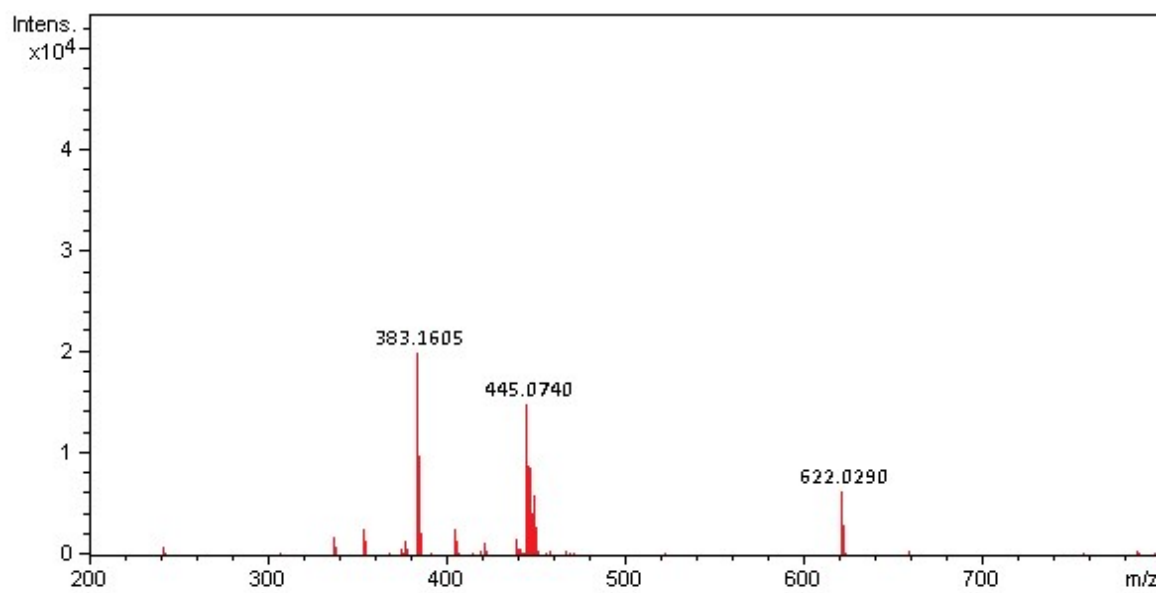

**Figure S7.** FT-IR spectrum of 2-hydroxy-5-methoxybenzaldehyde in KBr disc.

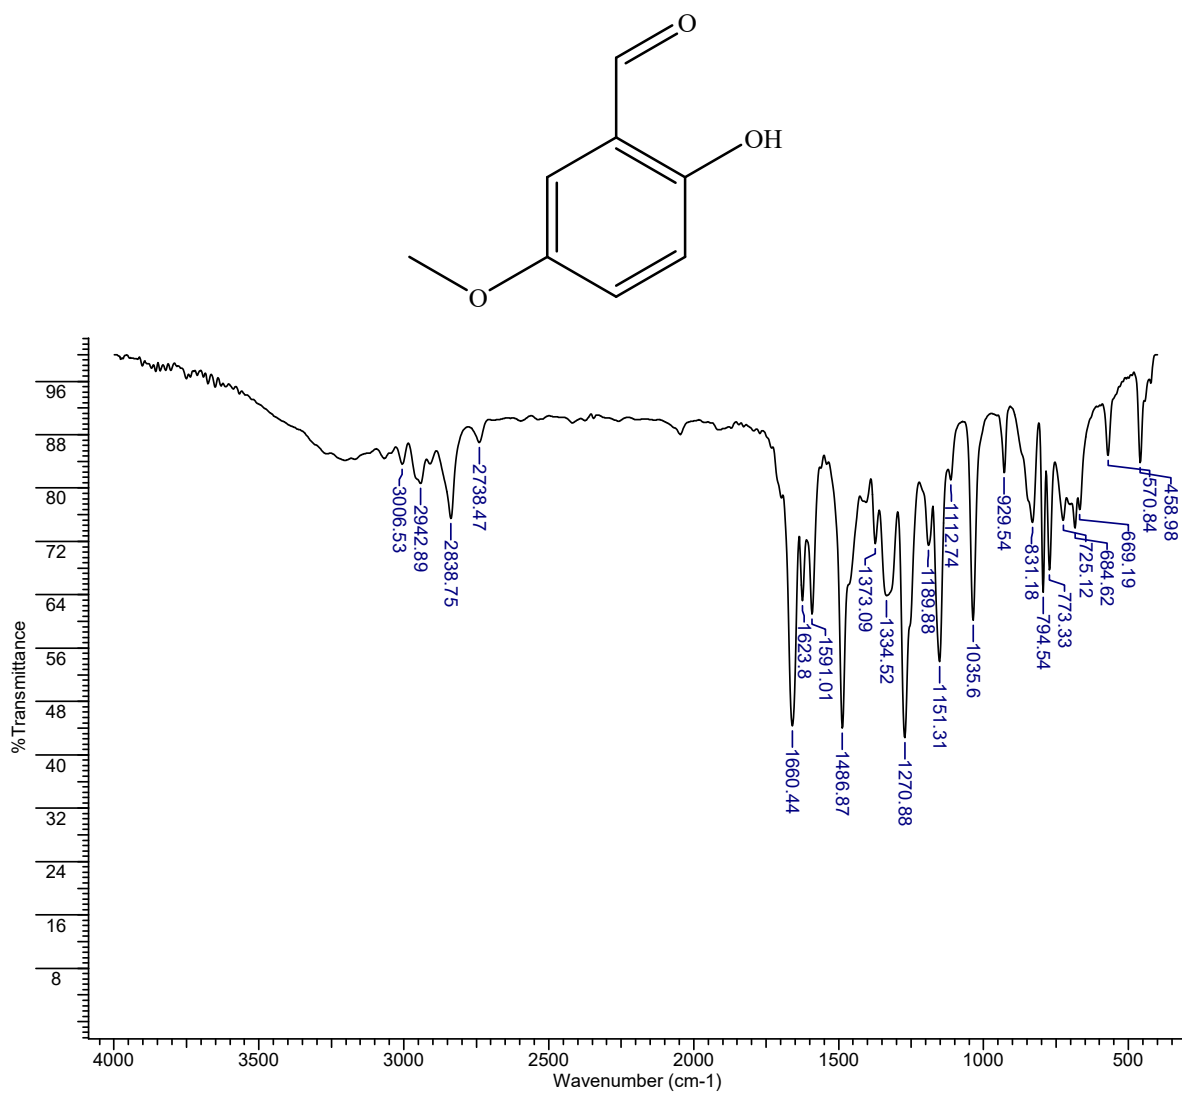

Figure S8. FT-IR spectrum of salicylaldehyde in KBr disc.

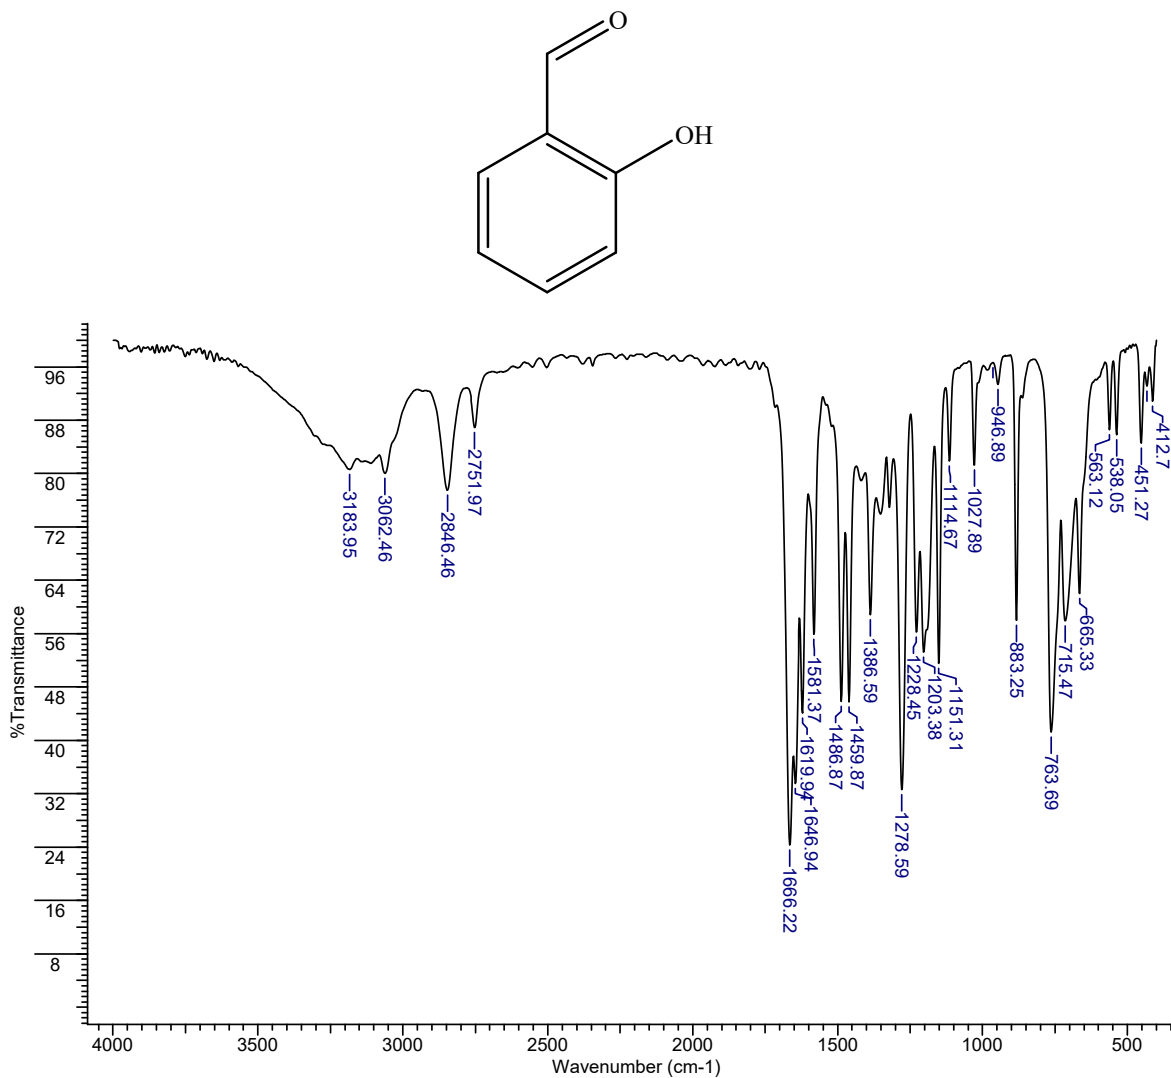



**Figure S9.** FT-IR spectrum of *o*-phenylenediamine in KBr disc.

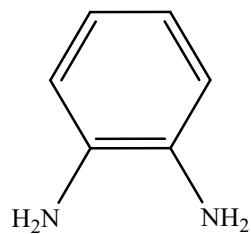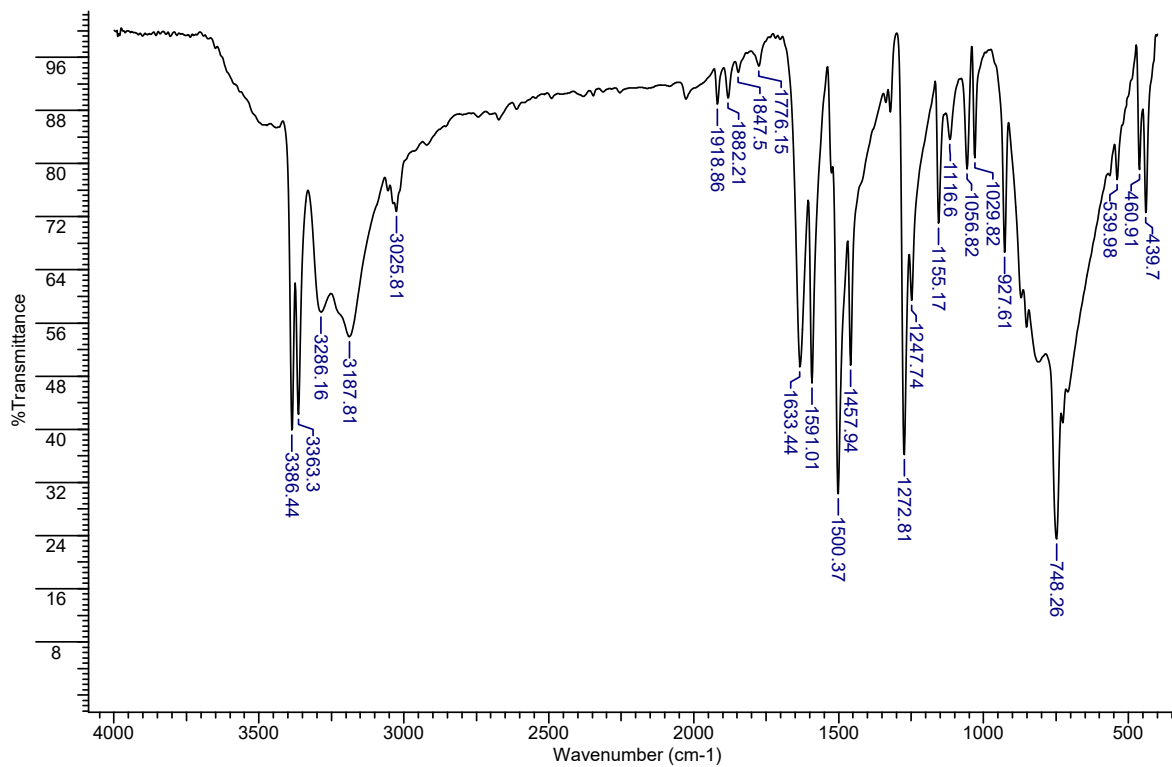

**Figure S10.** FT-IR spectrum of ethyl-2-(ethoxymethylene)acetoacetate in KBr disc.

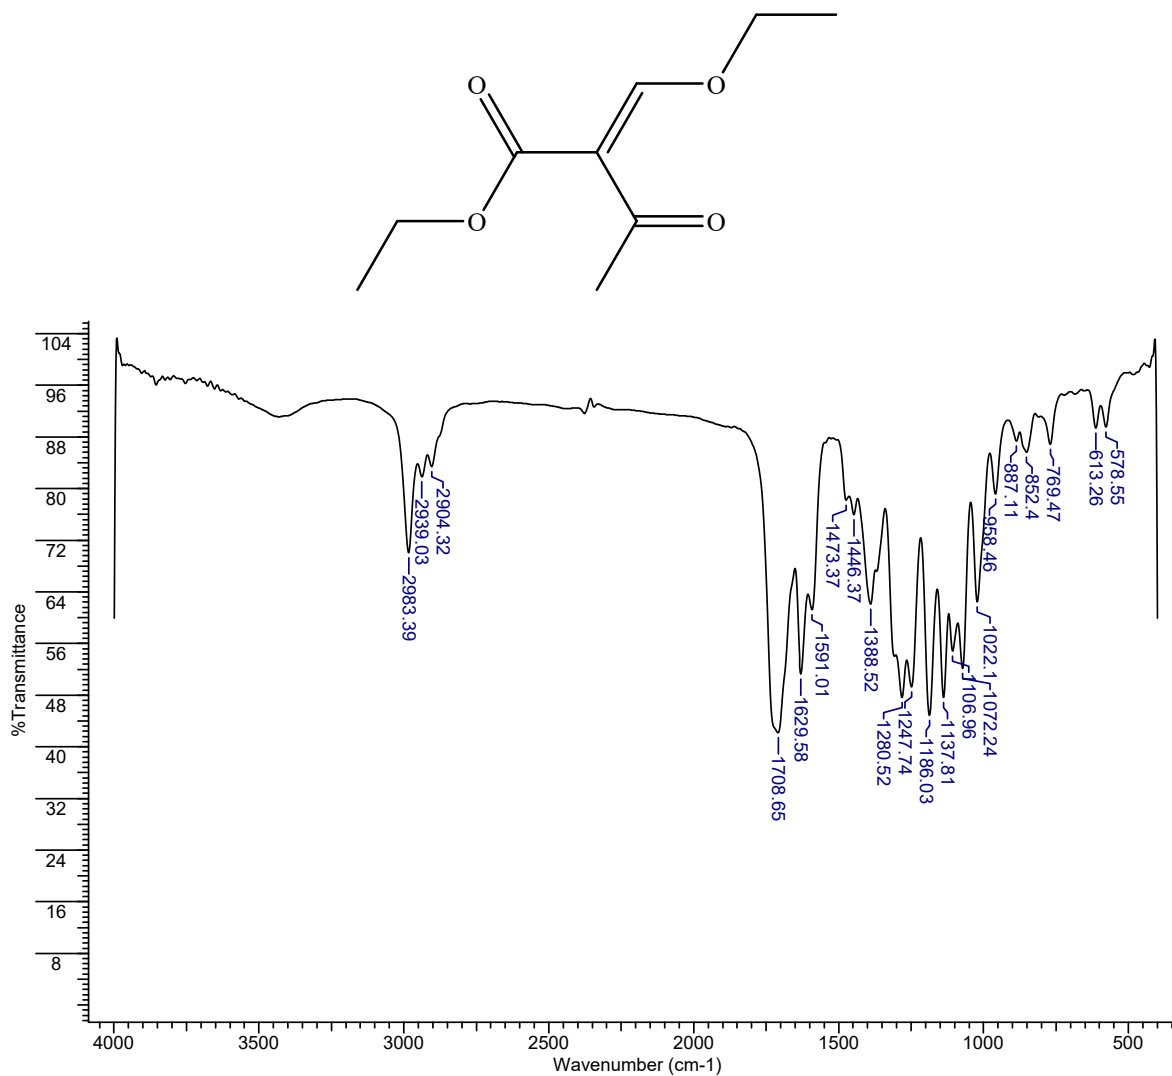

Figure S11. FT-IR spectrum of compound **H<sub>2</sub>L<sup>1</sup>** in KBr disc.

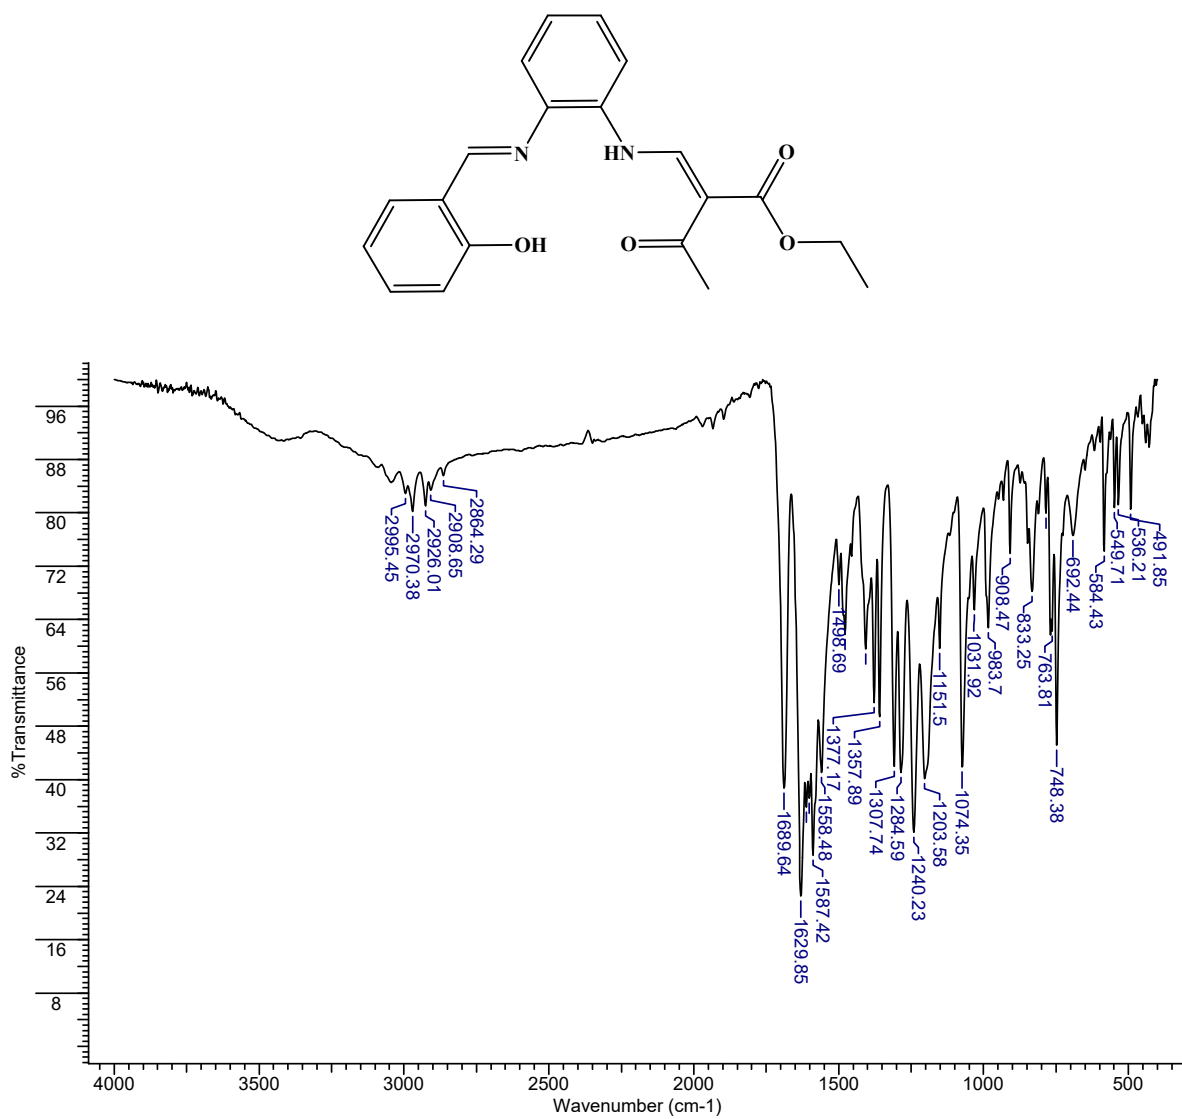

Figure S12. FT-IR spectrum of compound  $H_2L^2$  in KBr disc.

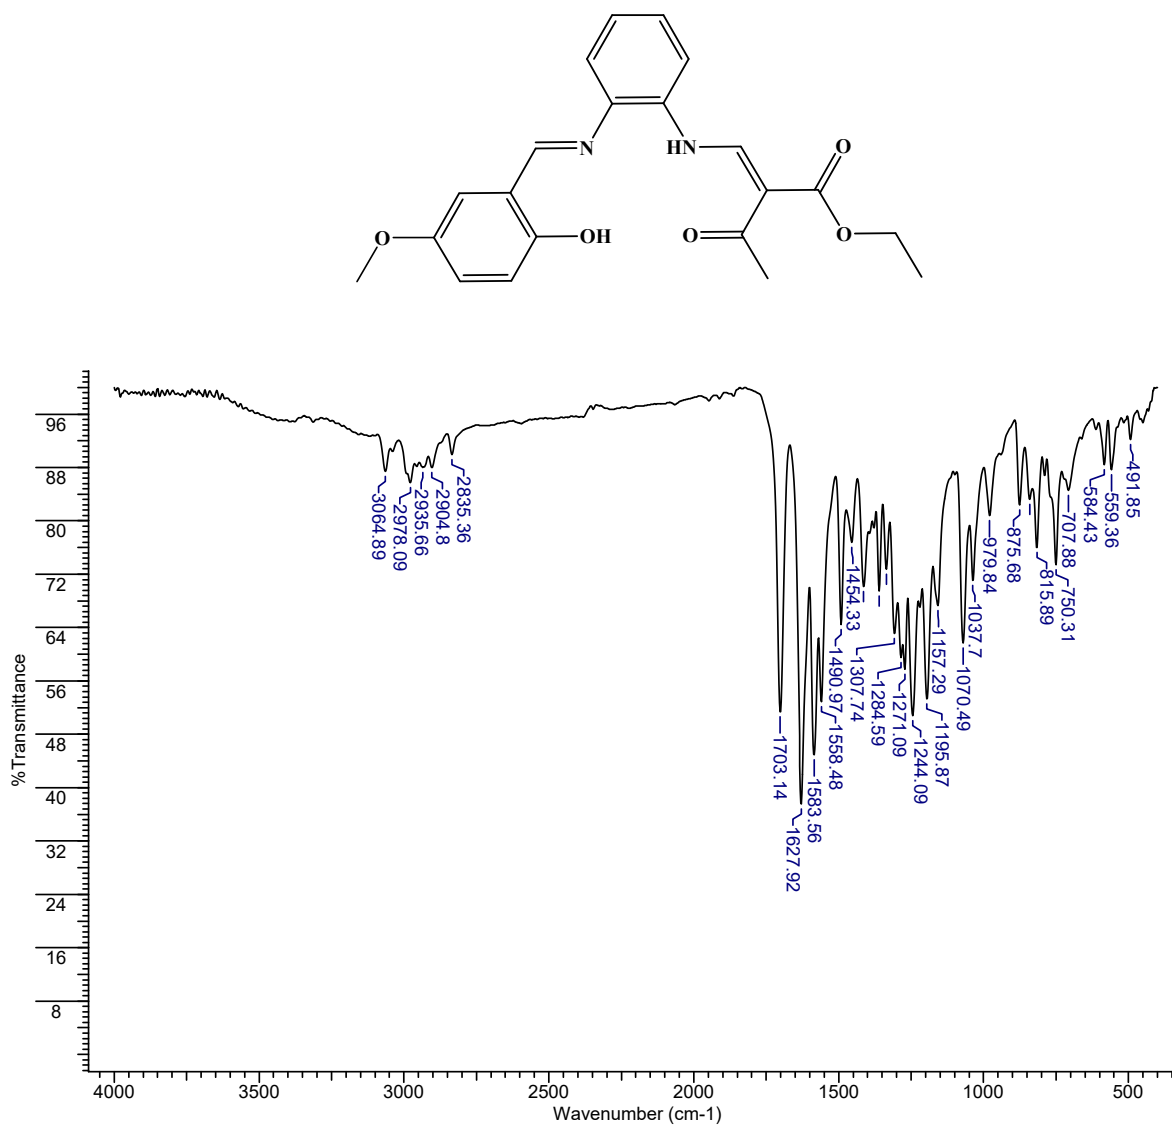

**Figure S13.** FT-IR spectrum of compound  $\text{Ni}^{\text{II}}\text{-L}^1$  in KBr disc.

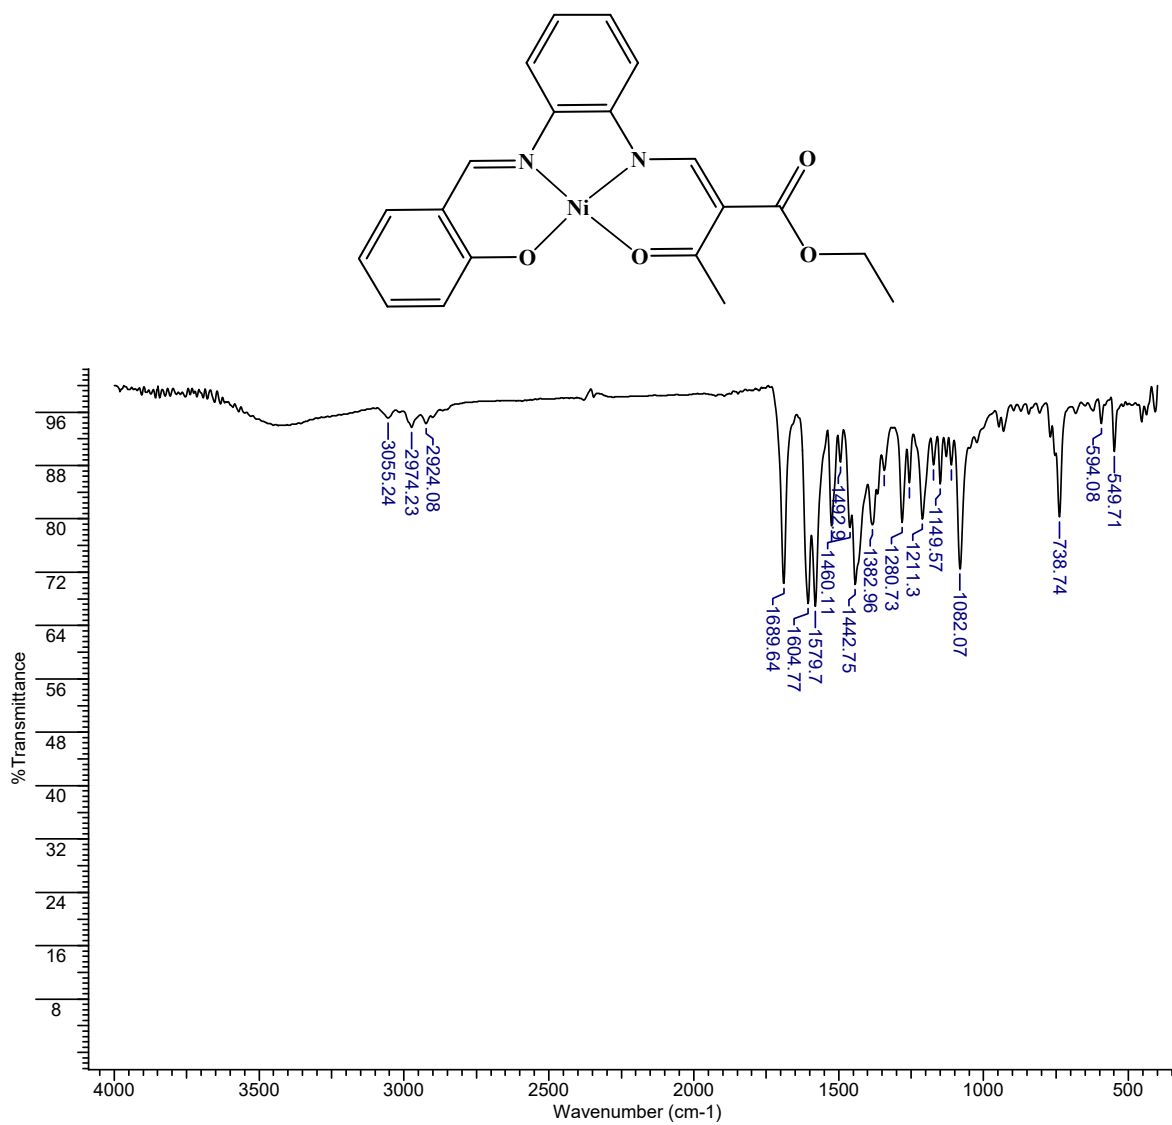

**Figure S14.** FT-IR spectrum of compound **Zn<sup>II</sup>-L<sup>1</sup>** in KBr disc.

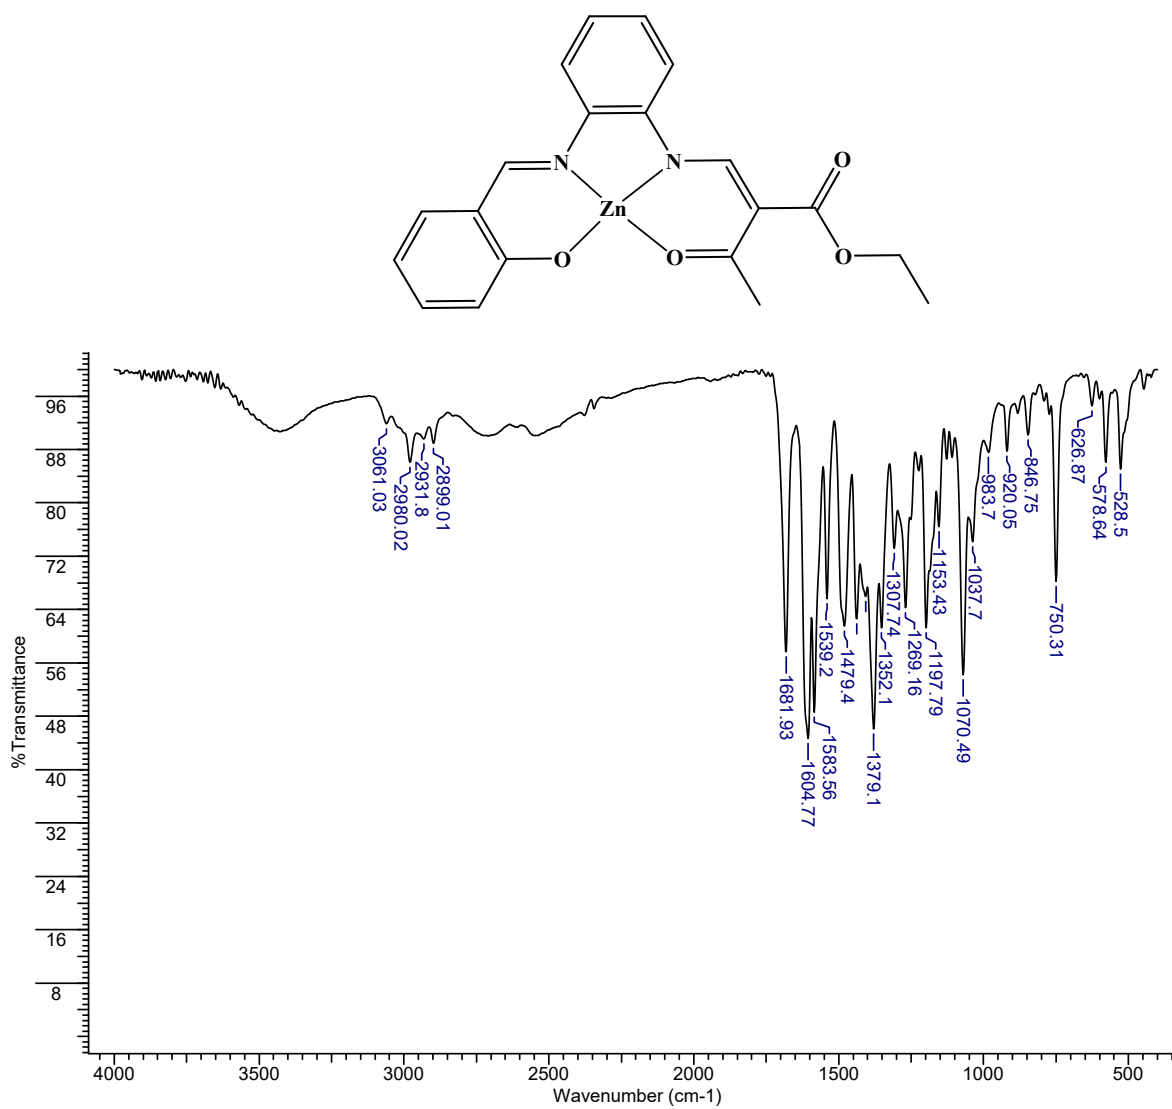

**Figure S15.** FT-IR spectrum of compound  $\text{Ni}^{\text{II}}\text{-L}^2$  in KBr disc.

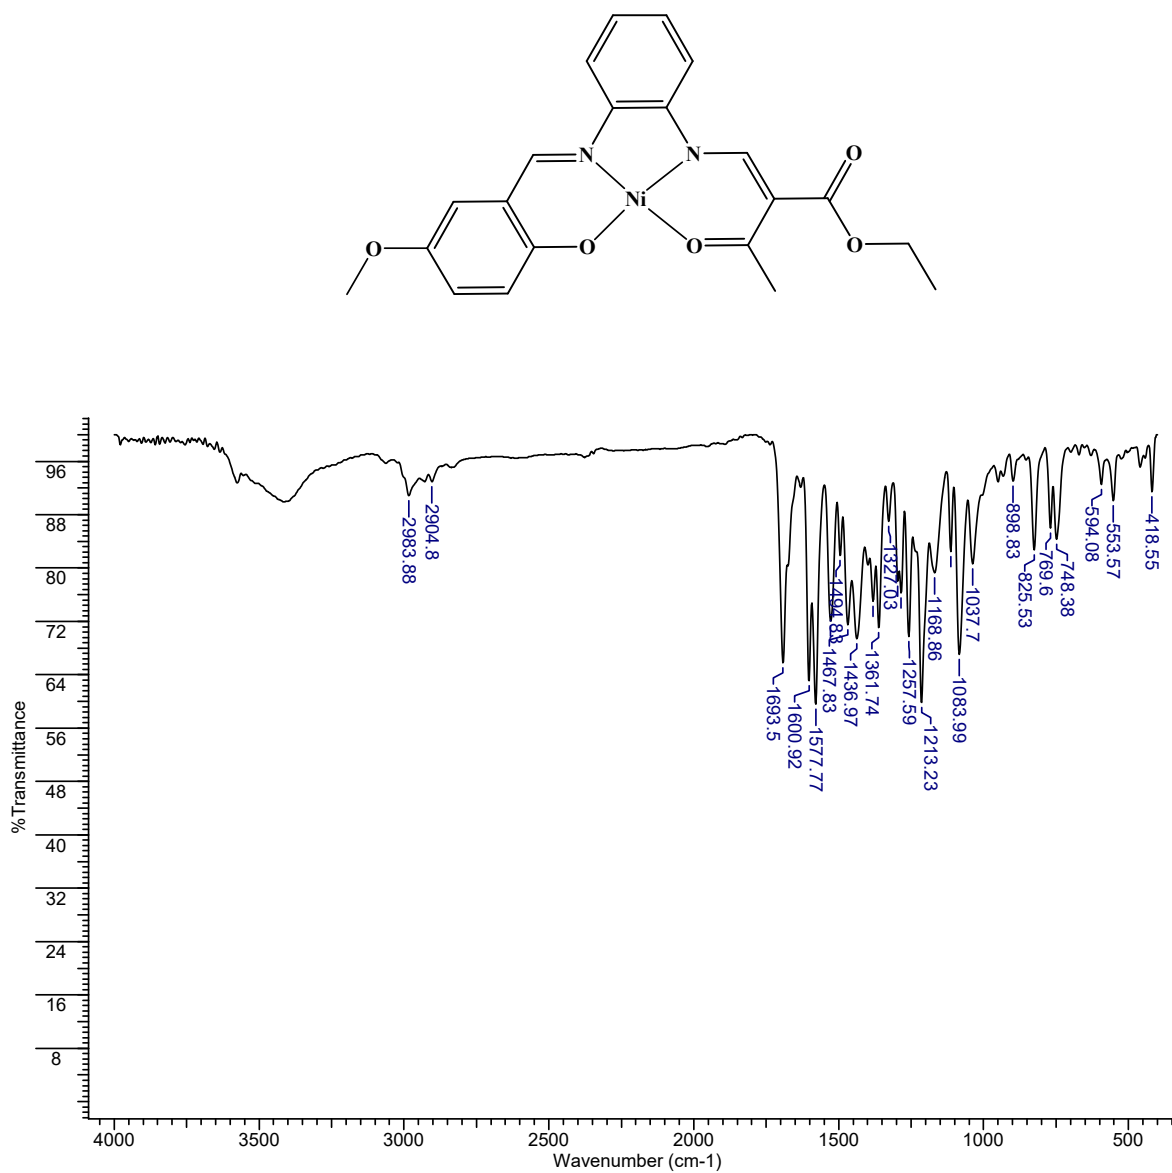

**Figure S16.** FT-IR spectrum of compound **Zn<sup>II</sup>-L<sup>2</sup>** in KBr disc.

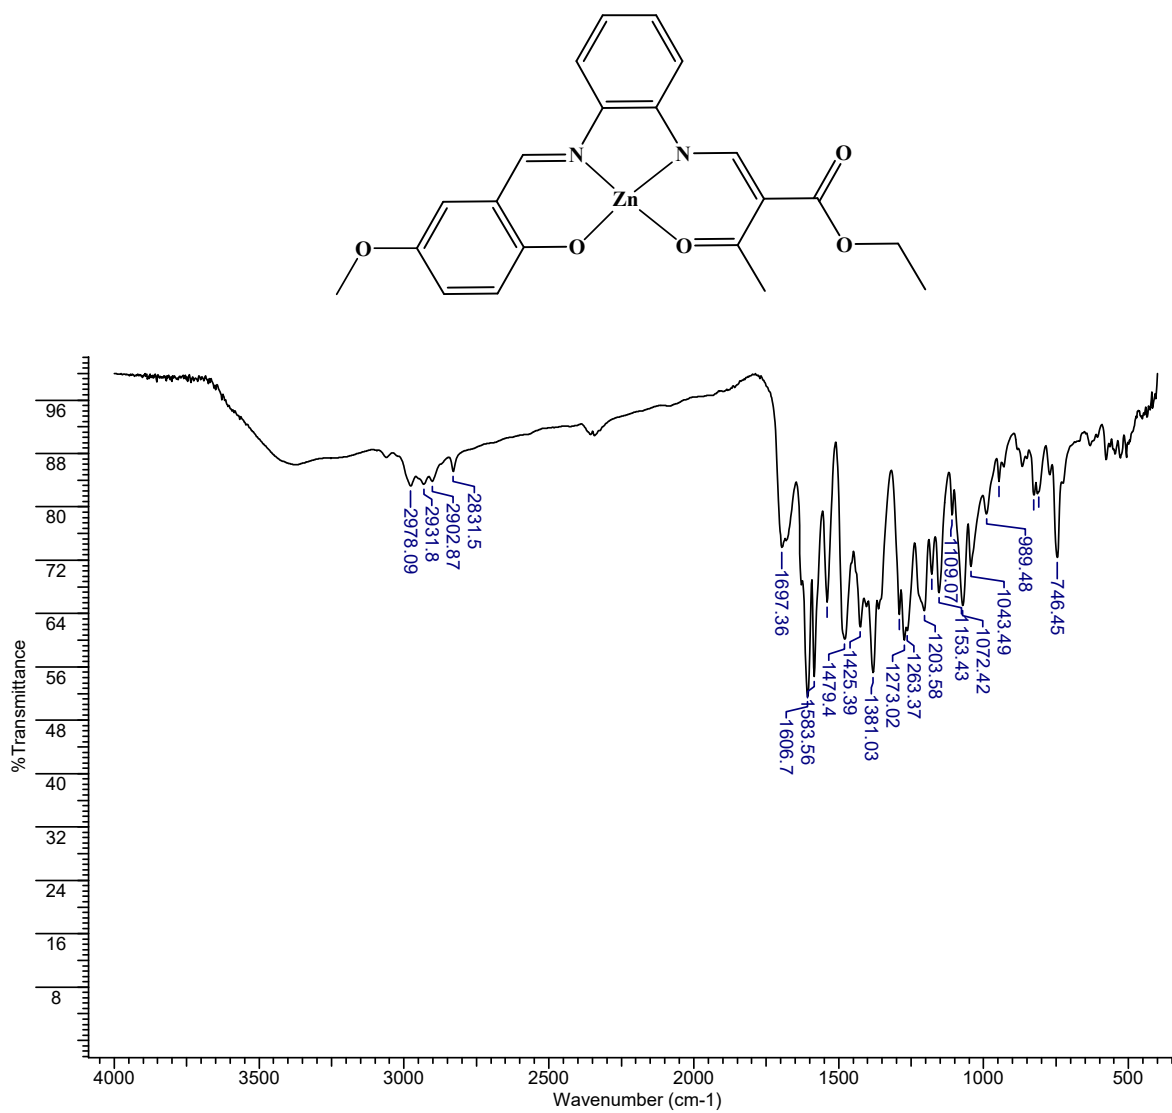



**Figure S17.** (a)  $^1\text{H}$  NMR spectrum (400 MHz) of compound  $\text{H}_2\text{L}^1$  in  $\text{CDCl}_3$ ; (b) zoom-in of the aromatic region of the  $^1\text{H}$  NMR spectrum of  $\text{H}_2\text{L}^1$ .

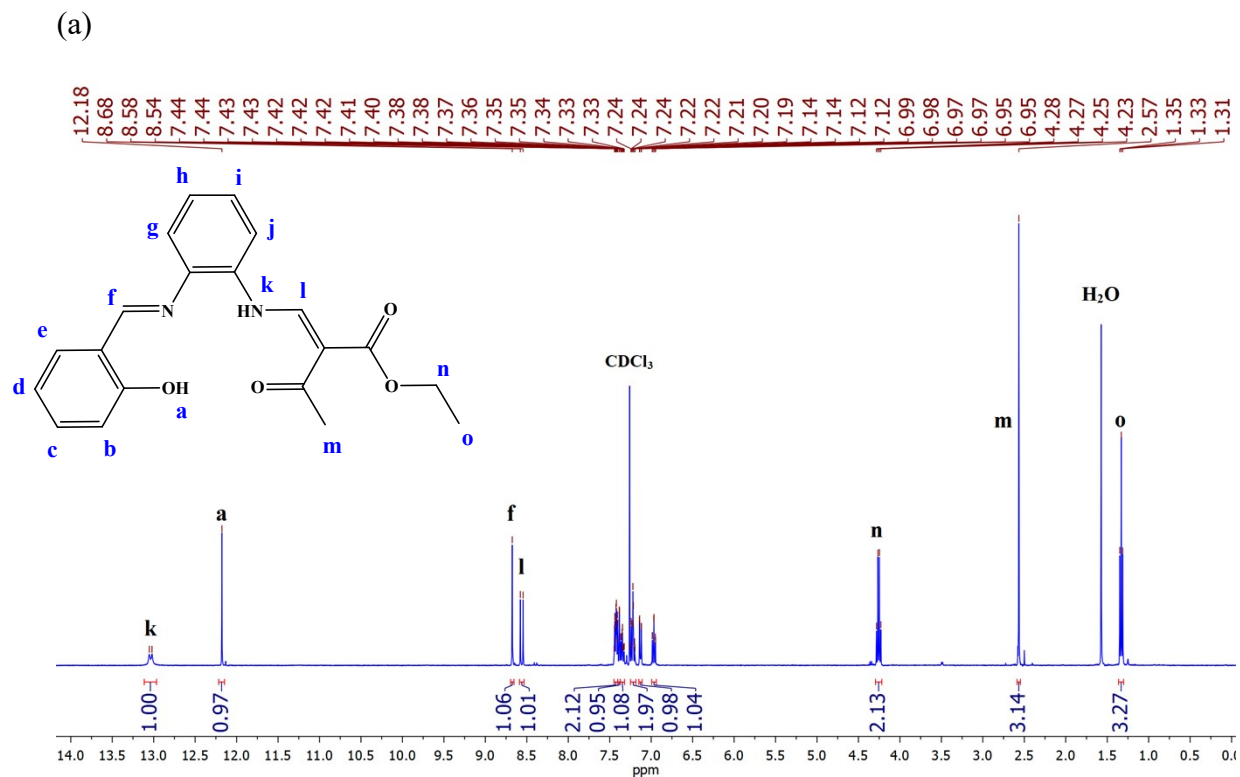

(b)

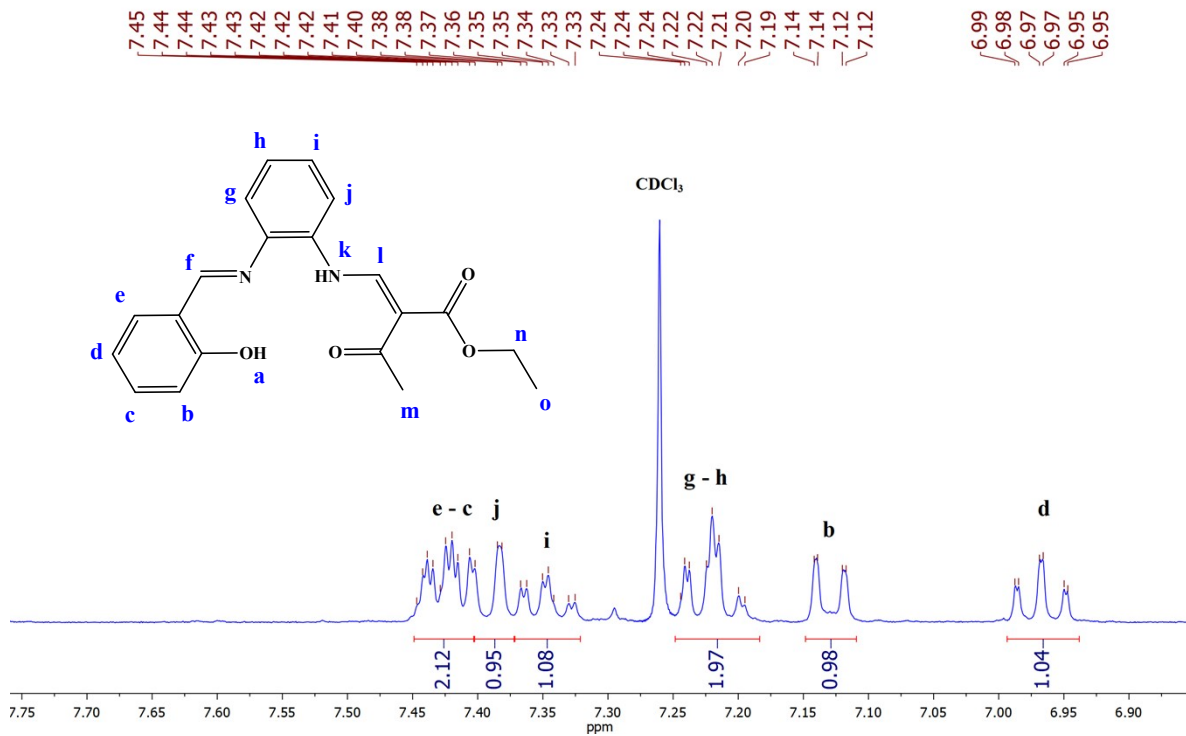

**Figure S18.** (a)  $^1\text{H}$  NMR spectrum (400 MHz) of compound  $\text{H}_2\text{L}^2$  in  $\text{CDCl}_3$ ; (b) zoom-in of the aromatic region of the  $^1\text{H}$  NMR spectrum of  $\text{H}_2\text{L}^2$ .

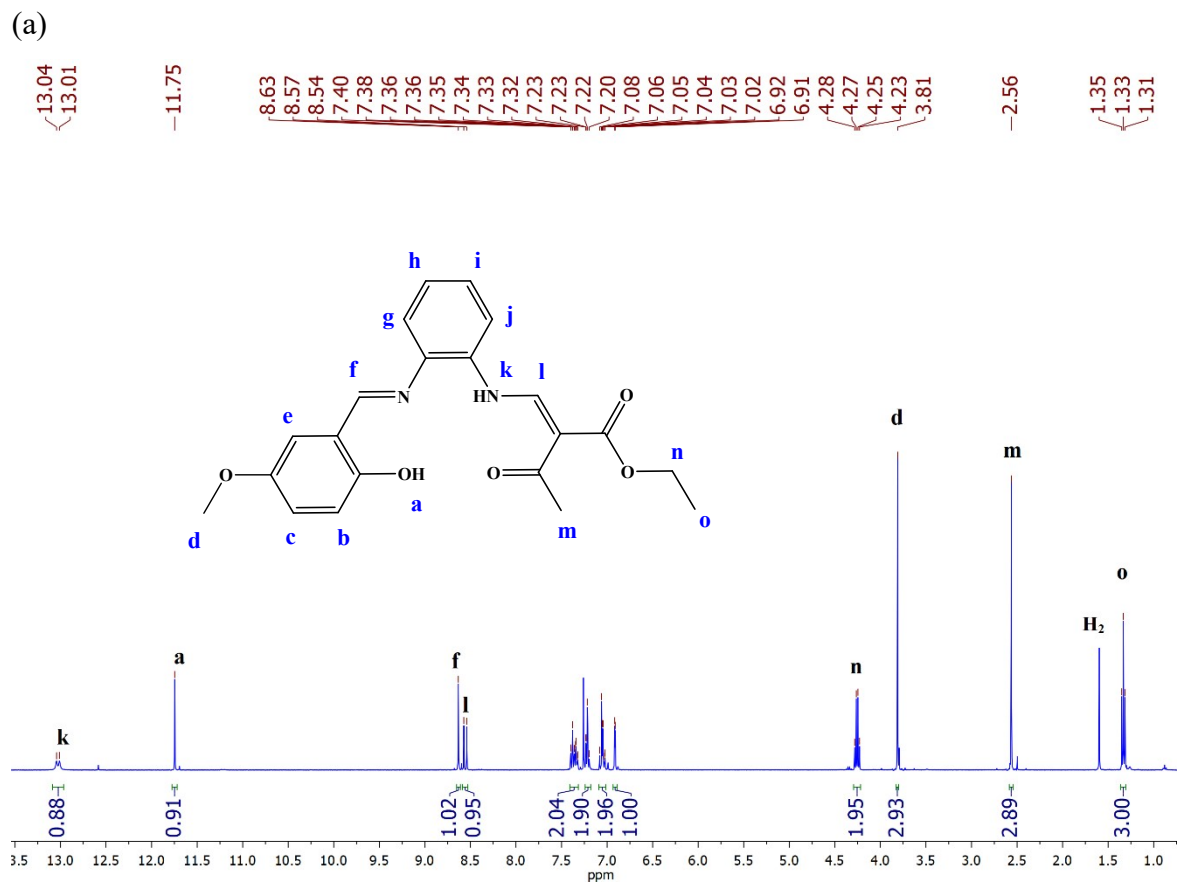

(b)

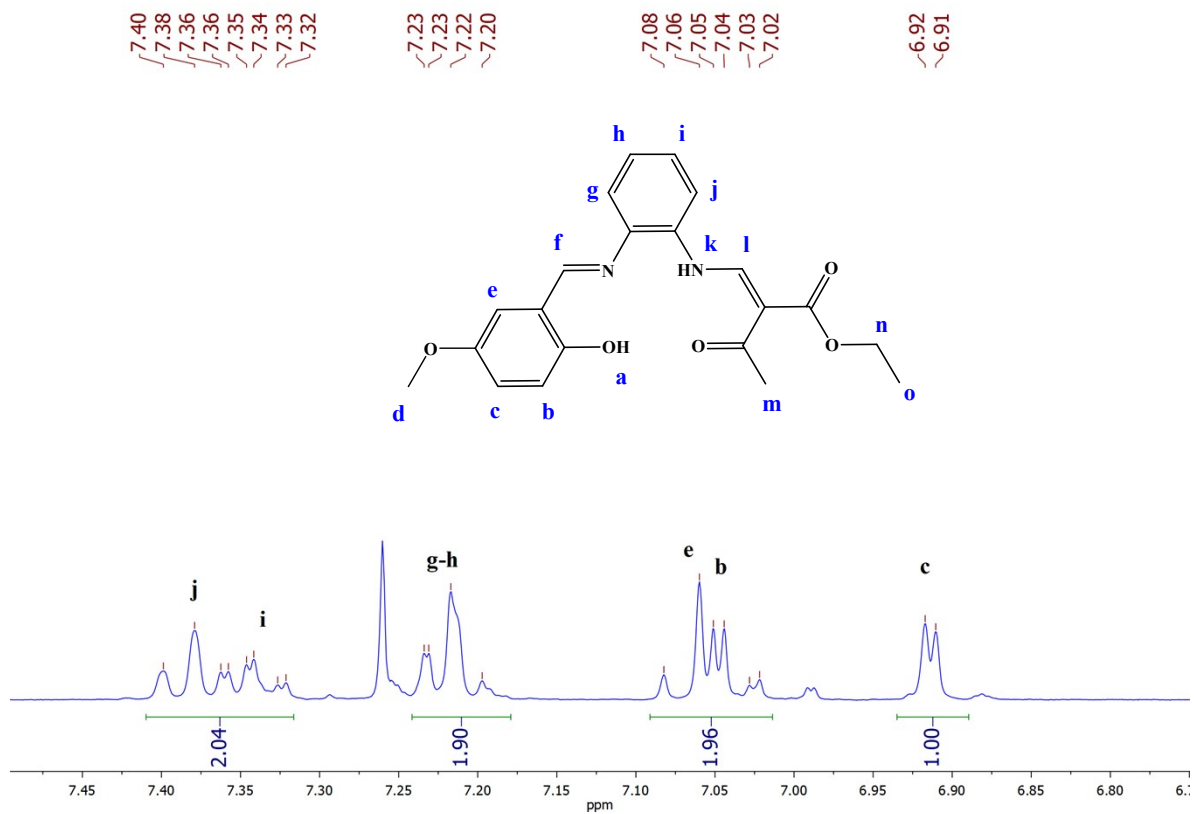

**Figure S19.** (a)  $^1\text{H}$  NMR spectrum (400 MHz) of compound  $\text{Ni}^{\text{II}}\text{-L}^1$  in  $\text{CDCl}_3$ ; (b) zoom-in of the aromatic region of the  $^1\text{H}$  NMR spectrum of  $\text{Ni}^{\text{II}}\text{-L}^1$ .

(a)

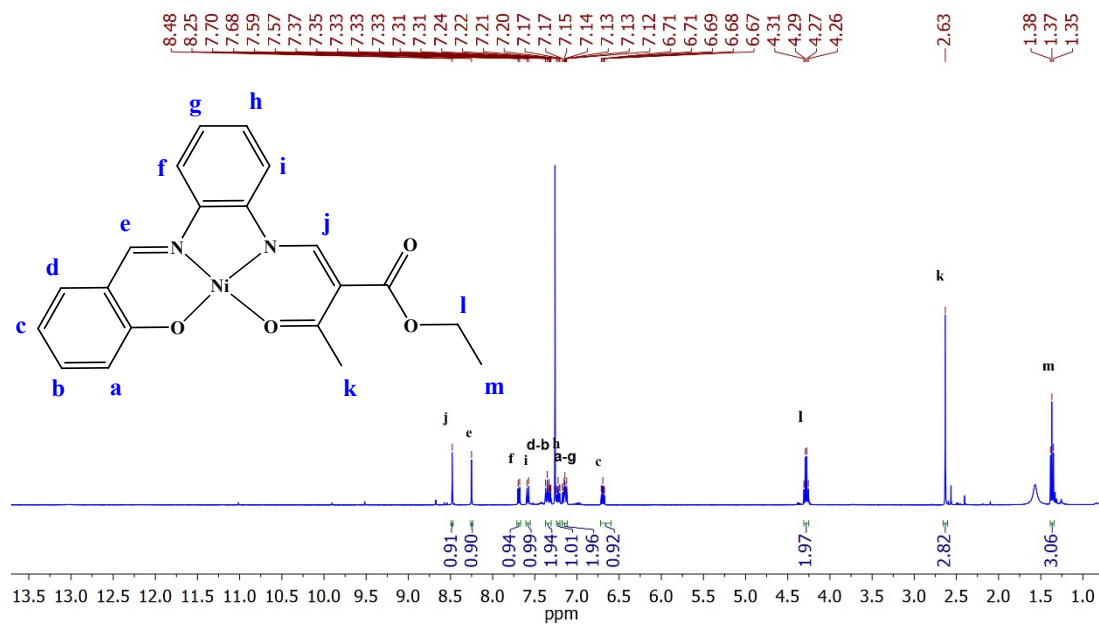

(b)

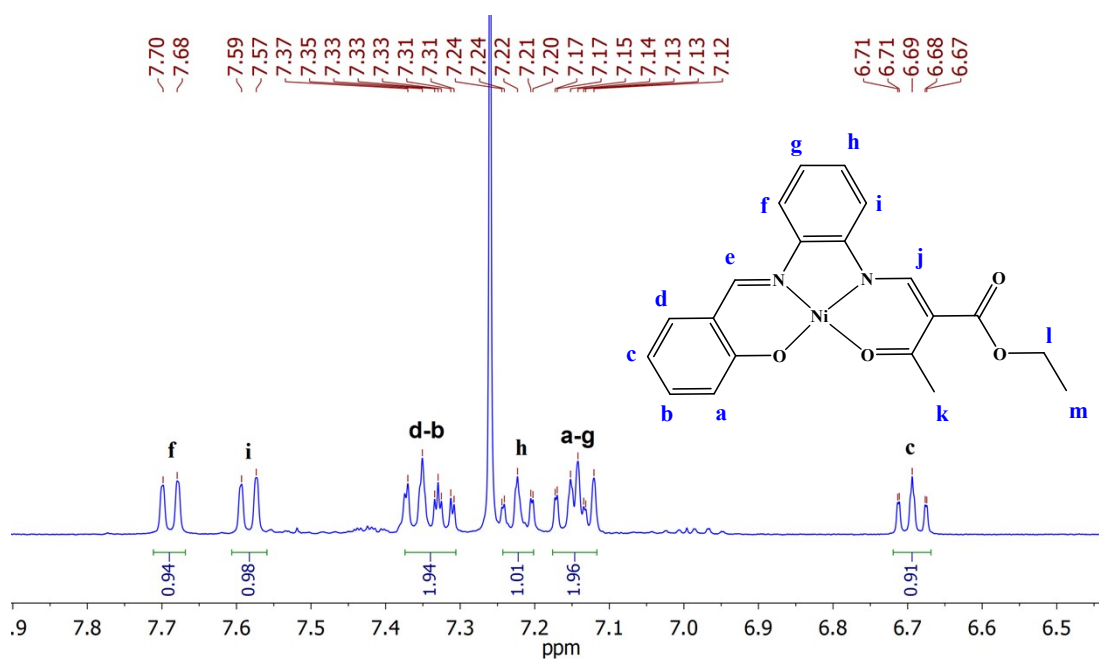

**Figure S20.** (a)  $^1\text{H}$  NMR spectrum (400 MHz) of compound  $\text{Zn}^{\text{II}}\text{-L}^1$  in DMSO; (b) zoom-in of the aromatic region of the  $^1\text{H}$  NMR spectrum of  $\text{Zn}^{\text{II}}\text{-L}^1$

a)

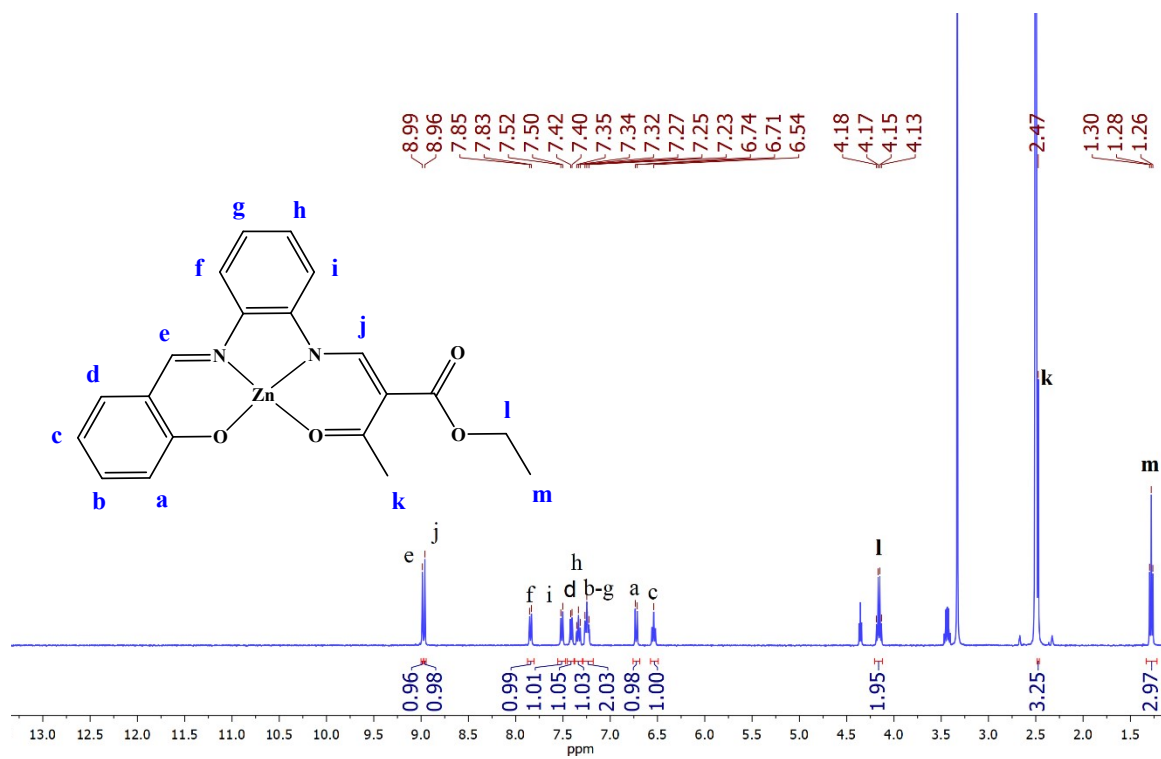

b)

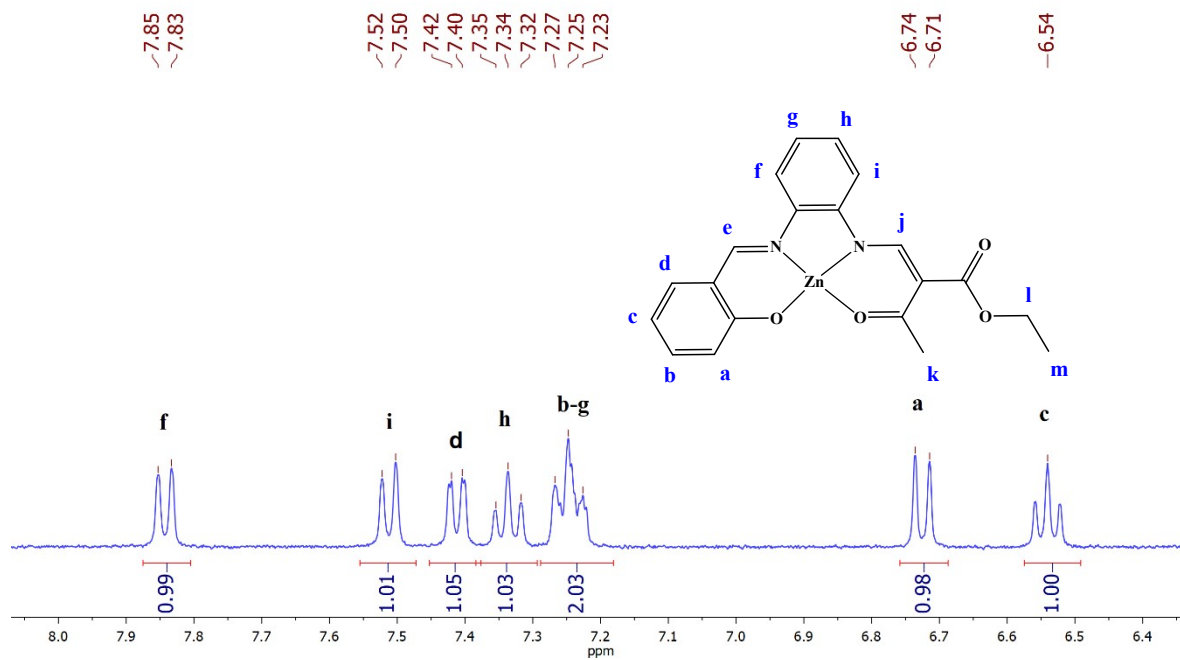



**Figure S21.** (a)  $^1\text{H}$  NMR spectrum (400 MHz) of compound  $\text{Ni}^{\text{II}}\text{-L}^2$  in  $\text{CDCl}_3$ ; (b) zoom-in of the aromatic region of the  $^1\text{H}$  NMR spectrum of  $\text{Ni}^{\text{II}}\text{-L}^2$ .

(a)

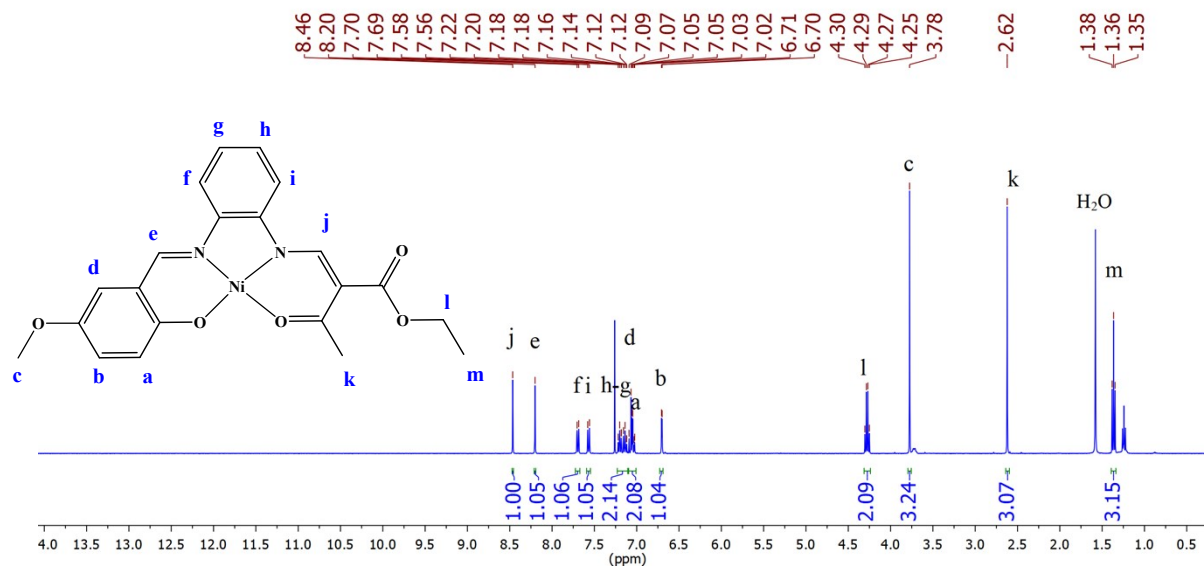

(b)

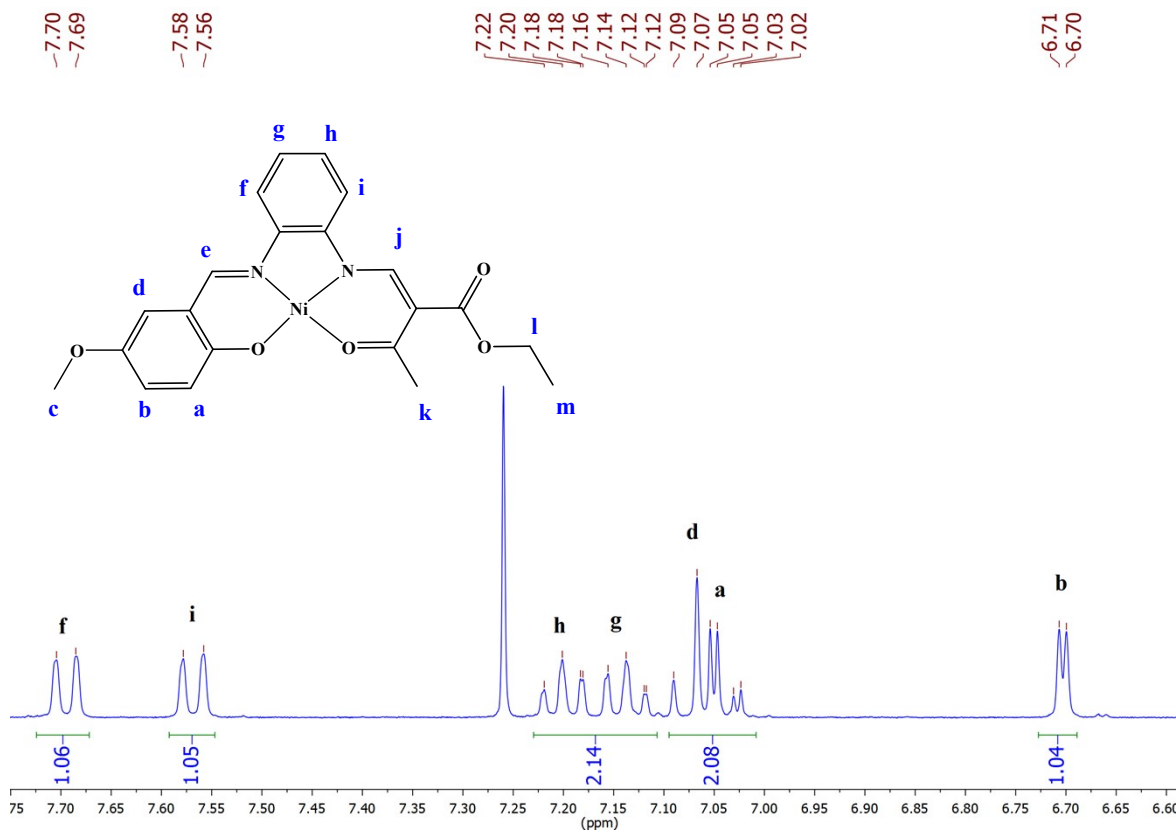

**Figure S22.** (a)  $^1\text{H}$  NMR spectrum (400 MHz) of compound  $\text{Zn}^{\text{II}}\text{-L}^2$  in DMSO; (b) zoom-in of the aromatic region of the  $^1\text{H}$  NMR spectrum of  $\text{Zn}^{\text{II}}\text{-L}^2$ .

(a)

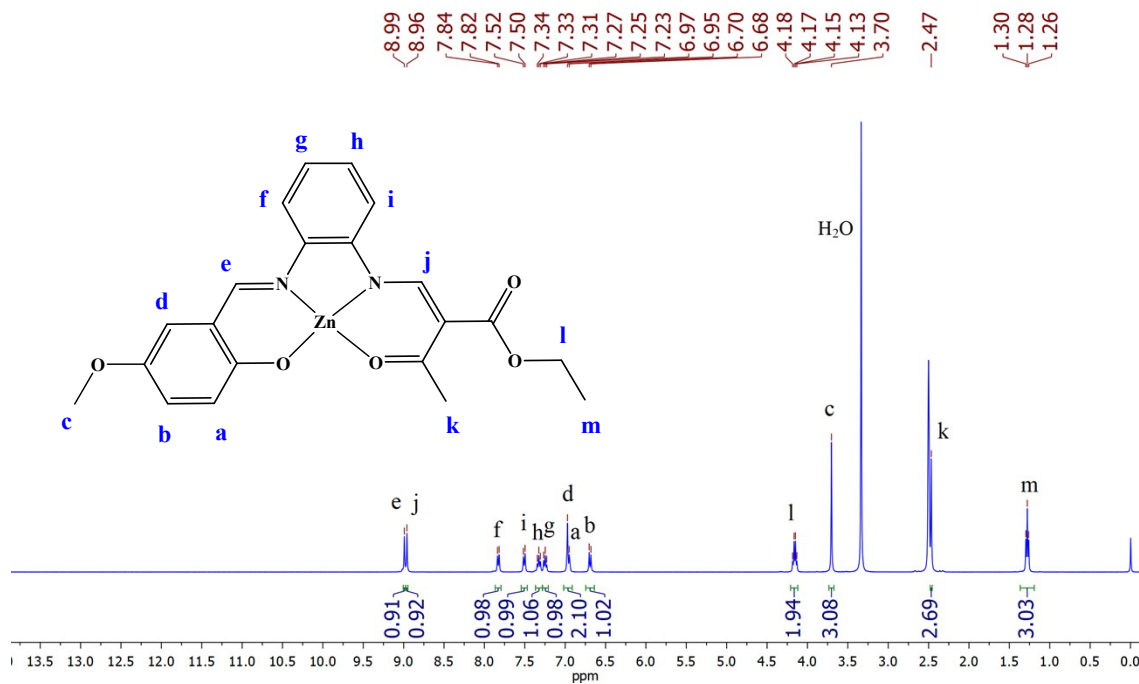

(b)

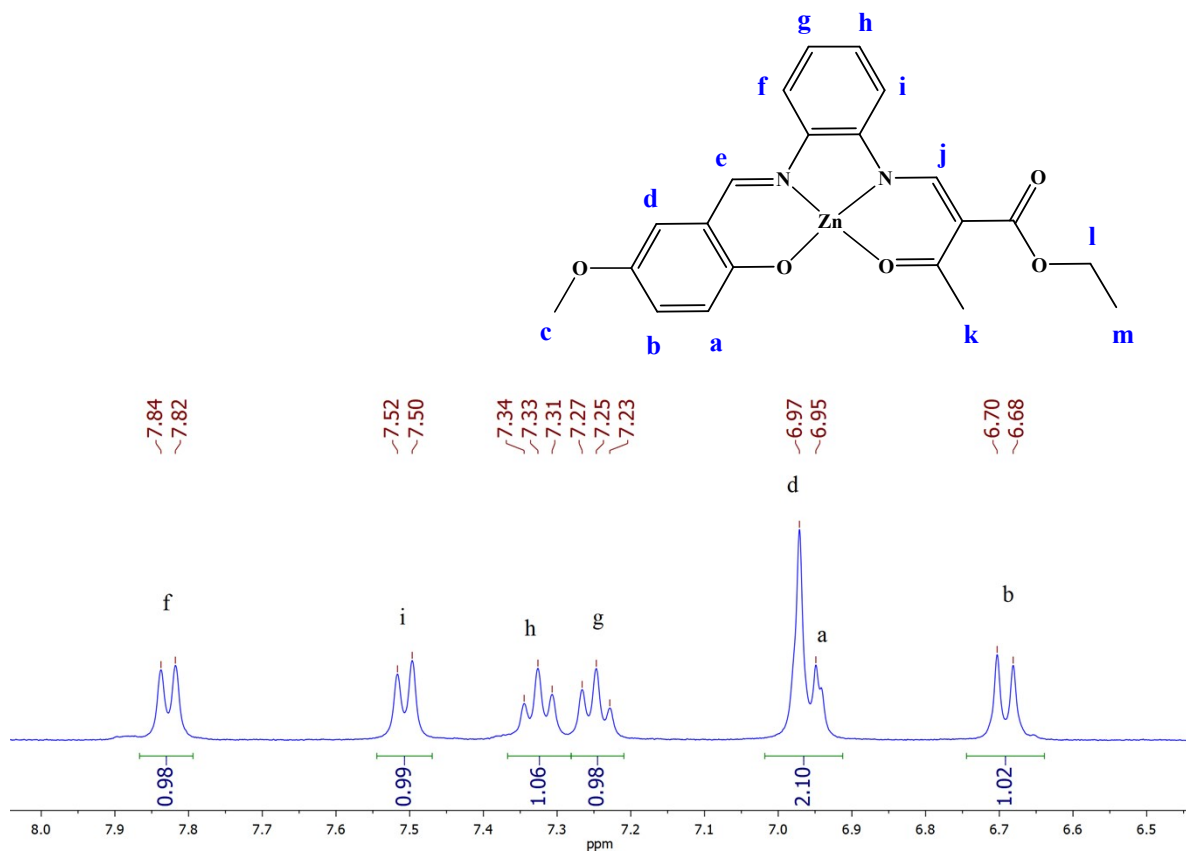

Figure S23.  $^{13}\text{C}$  NMR spectrum (400 MHz) of compound  $\text{H}_2\text{L}^1$  in  $\text{CDCl}_3$ .

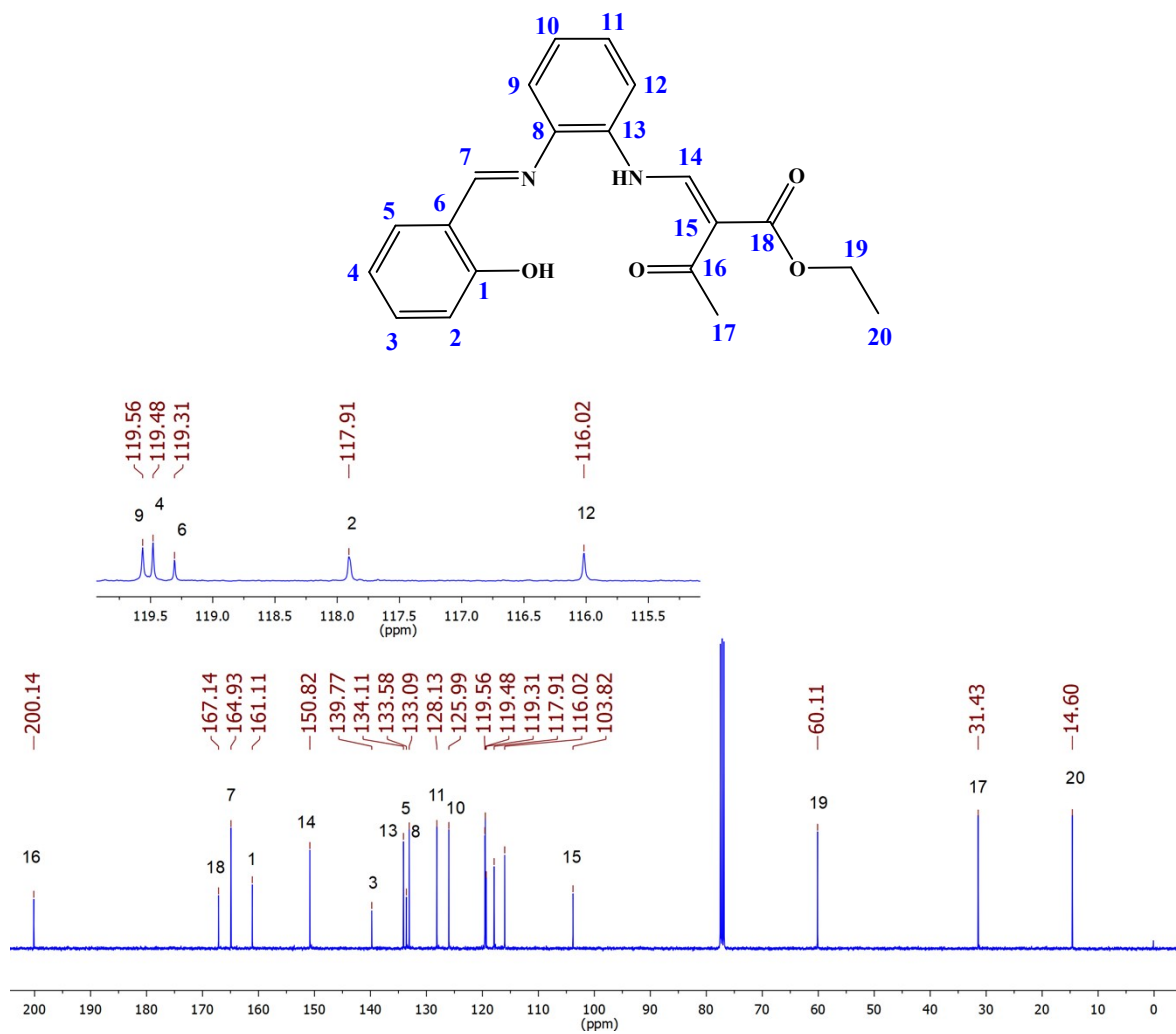

**Figure S24.**  $^{13}\text{C}$  NMR spectrum (400 MHz) of compound  $\text{H}_2\text{L}^2$  in  $\text{CDCl}_3$ .

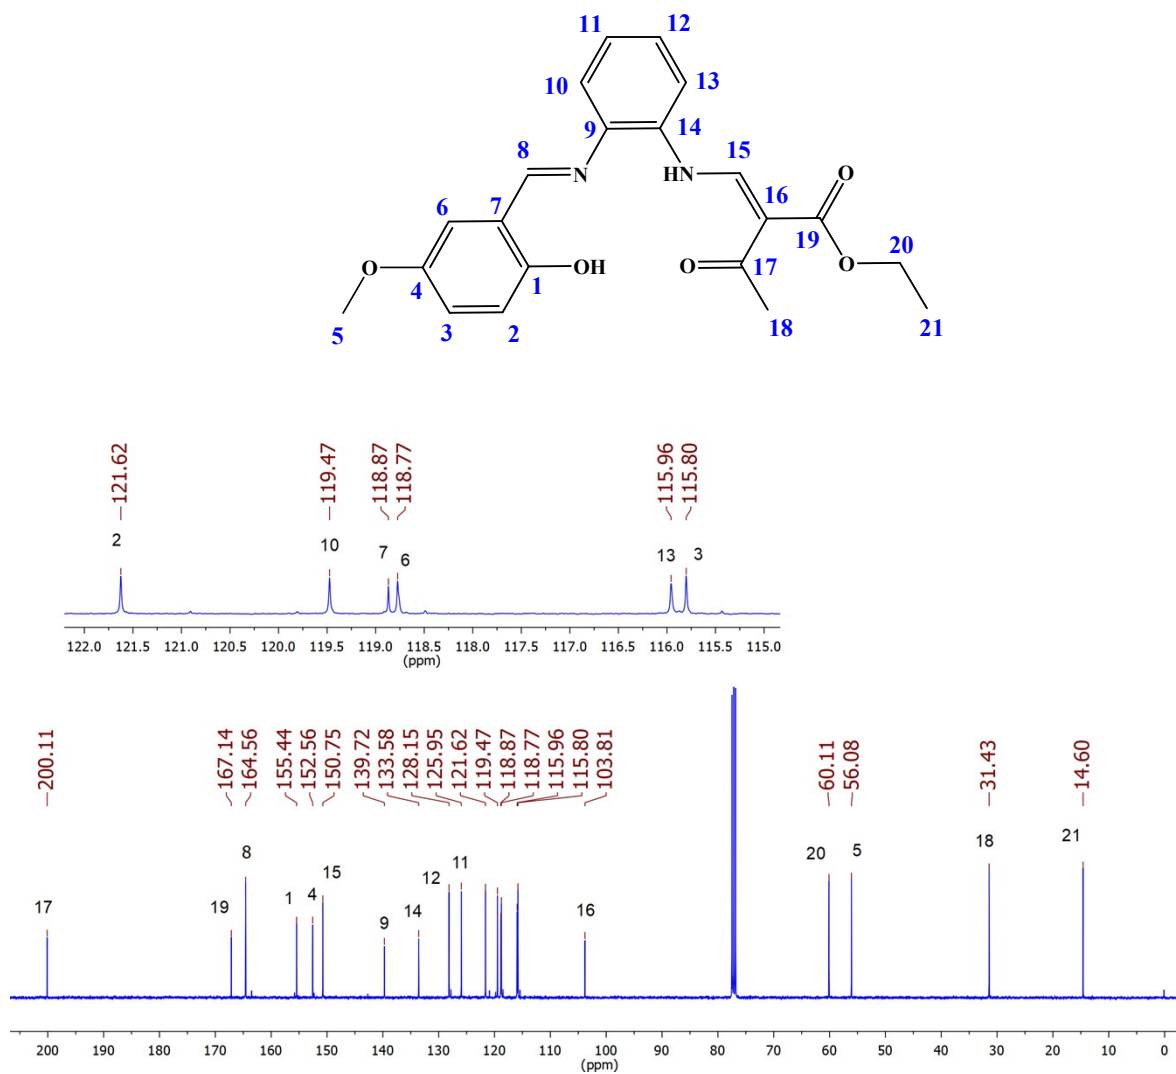

**Figure S25.**  $^{13}\text{C}$  NMR spectrum (400 MHz) of compound  $\text{Ni}^{\text{II}}\text{-L}^1$  in  $\text{CDCl}_3$ .

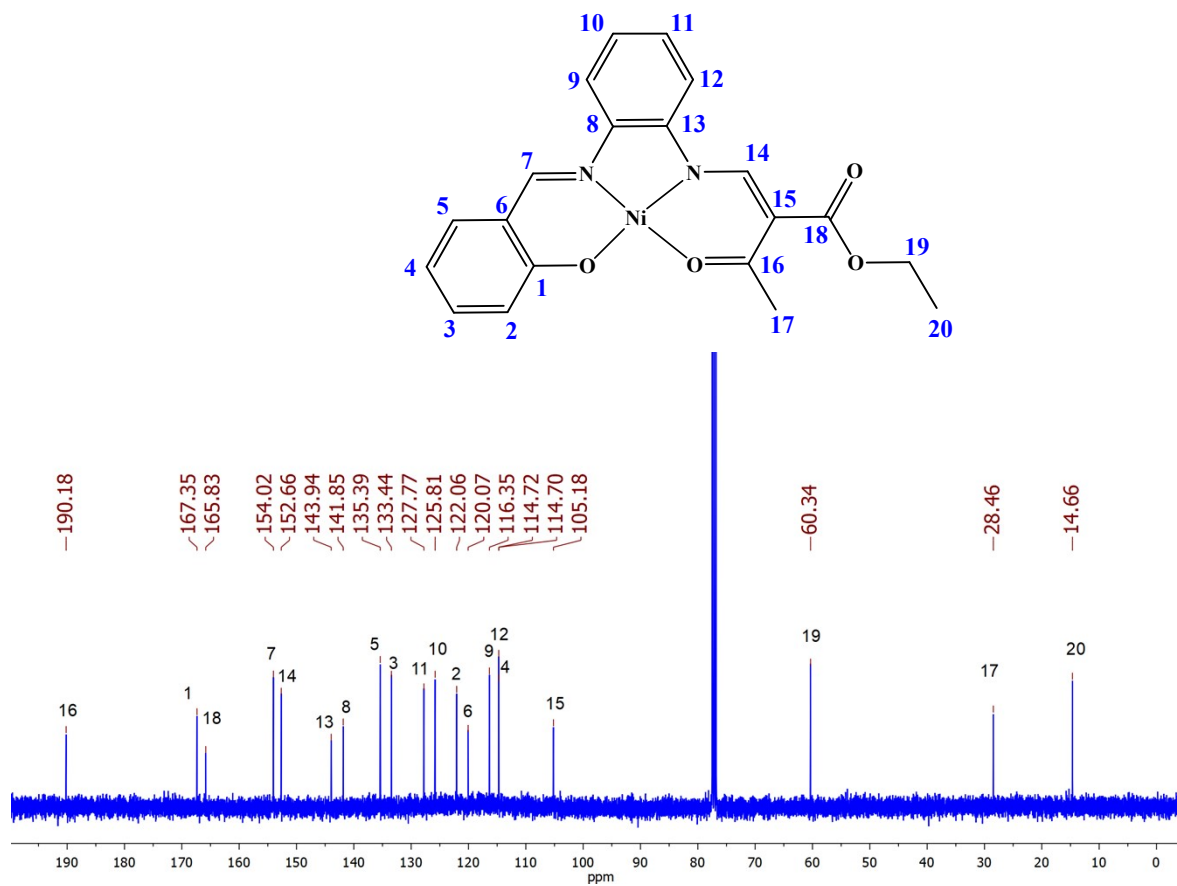

Figure S26.  $^{13}\text{C}$  NMR spectrum (400 MHz) of compound  $\text{Zn}^{\text{II}}\text{-L}^1$  in DMSO.

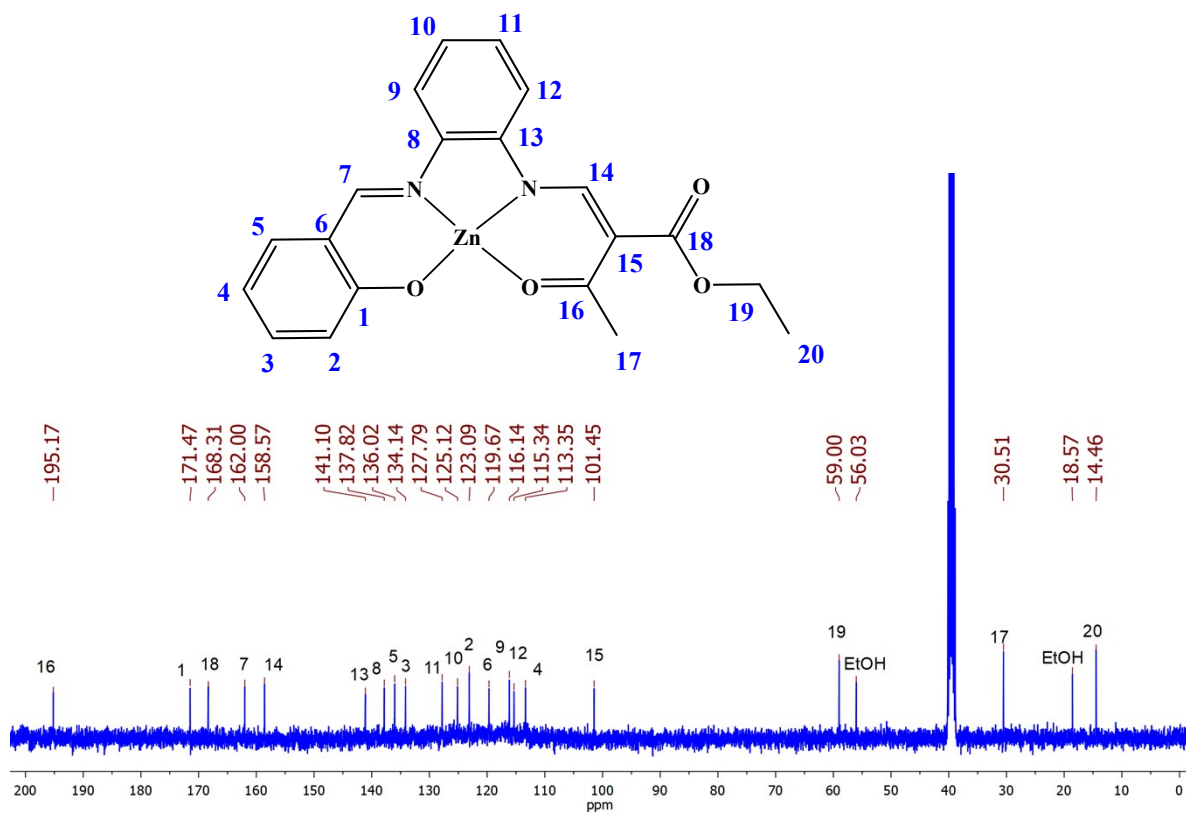



**Figure S27.**  $^{13}\text{C}$  NMR spectrum (400 MHz) of compound  $\text{Ni}^{\text{II}}\text{-L}^2$  in  $\text{CDCl}_3$ .

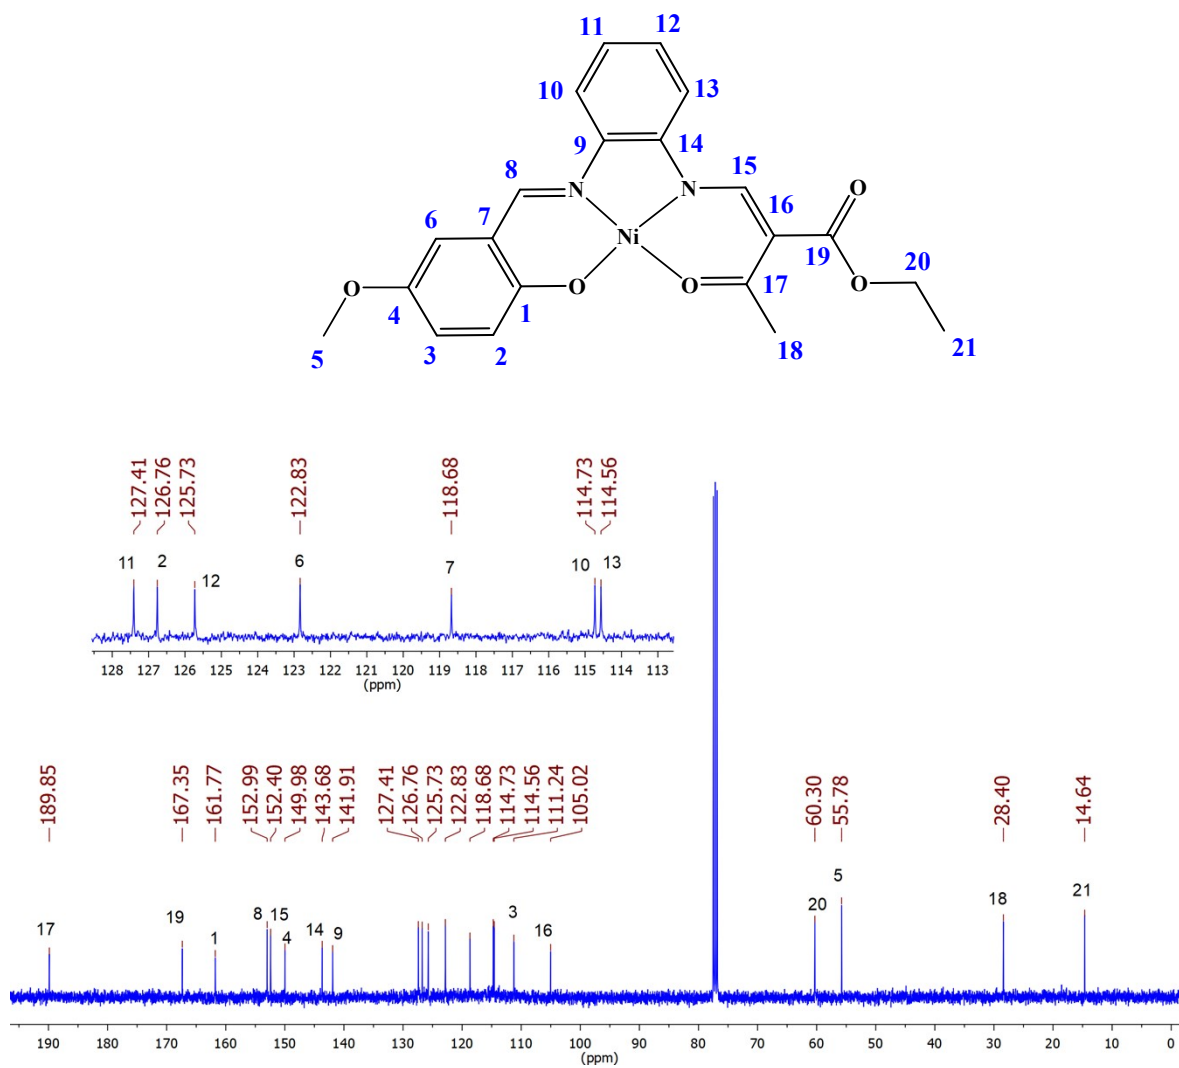

**Figure S28.**  $^{13}\text{C}$  NMR spectrum (400 MHz) of compound  $\text{Zn}^{\text{II}}\text{-L}^2$  in DMSO.

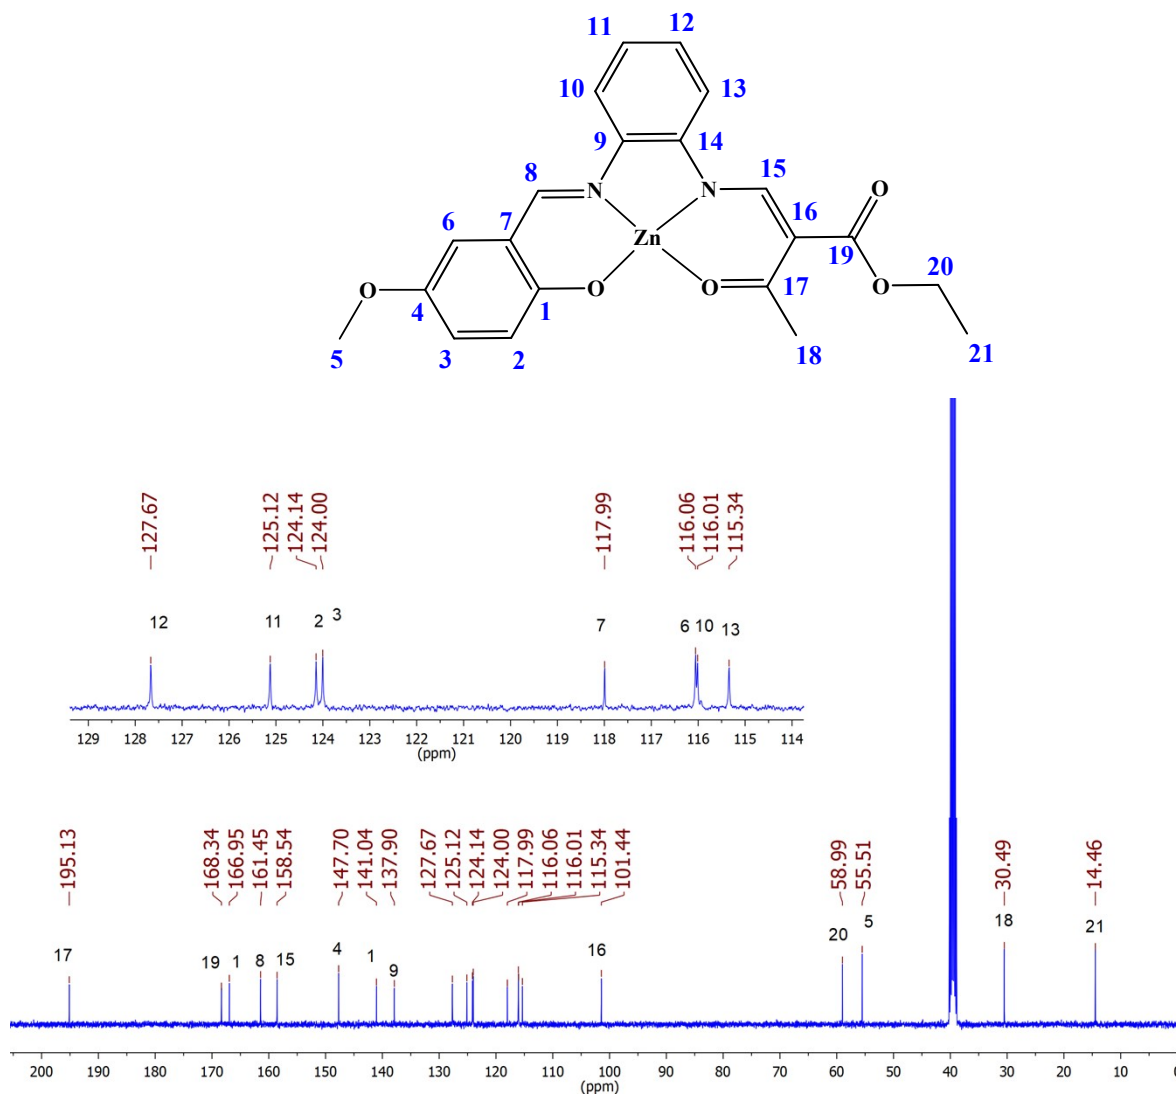

**Figure S29.** [ $^1\text{H}$ - $^1\text{H}$ ] NOESY NMR spectrum (400 MHz) of compound  $\text{Ni}^{\text{II}}\text{-L}^1$  in  $\text{CDCl}_3$ . The NOESY spectrum of  $\text{Ni}^{\text{II}}\text{-L}^1$  shows the interaction between hydrogen at 8.19 ppm with two hydrogens atoms from aromatic region which is consistent with the assignment of the signal at 8.19 as imine group ( $\text{CH}=\text{N}$ ).

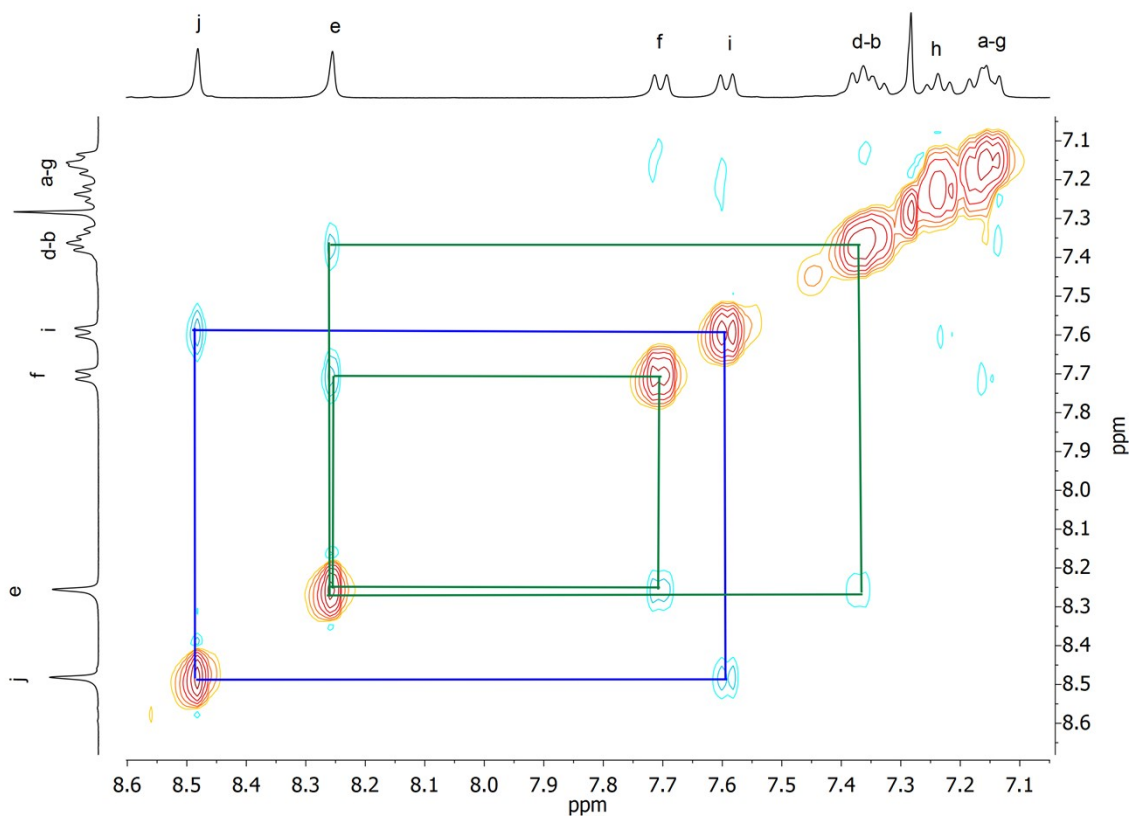

**Figure S30.**  $^1\text{H}$  NMR spectra of compound  $\text{H}_2\text{L}^1$  at different periods of storage (0, 4, 12 and 24 h) in  $\text{DMSO-}d_6\text{:D}_2\text{O}$  solution (9:1) at 300 K.

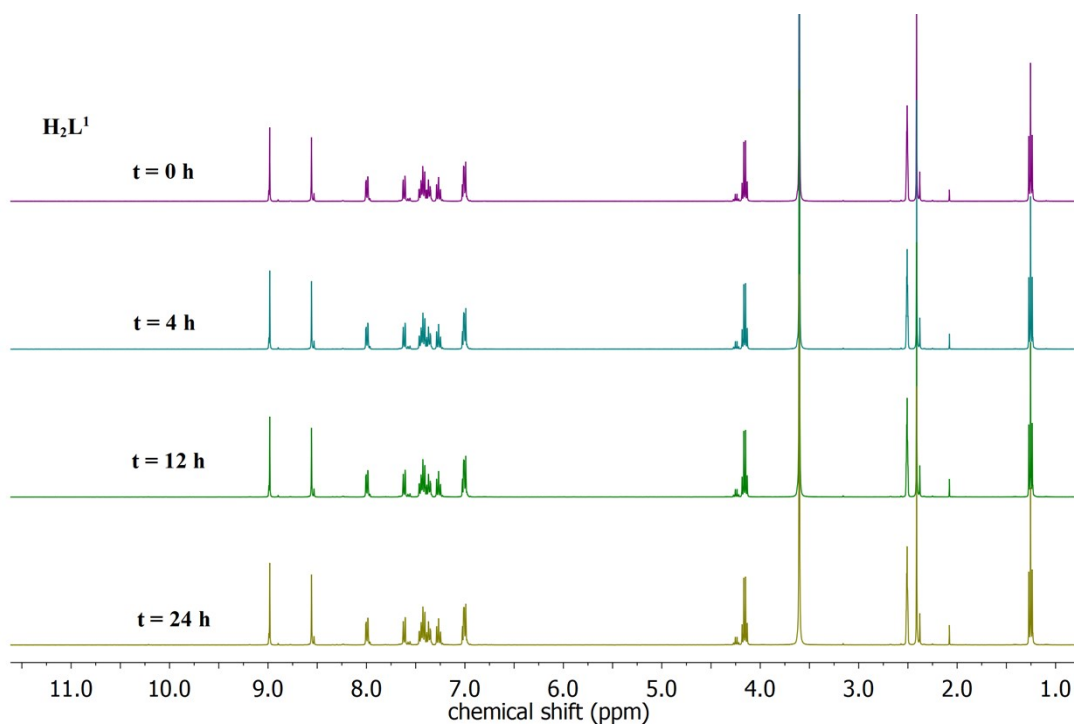

**Figure S31.**  $^1\text{H}$  NMR spectra of compound  $\text{H}_2\text{L}^2$  at different periods of storage (0, 4, 12 and 24 h) in  $\text{DMSO-}d_6\text{:D}_2\text{O}$  solution (9:1) at 300 K.

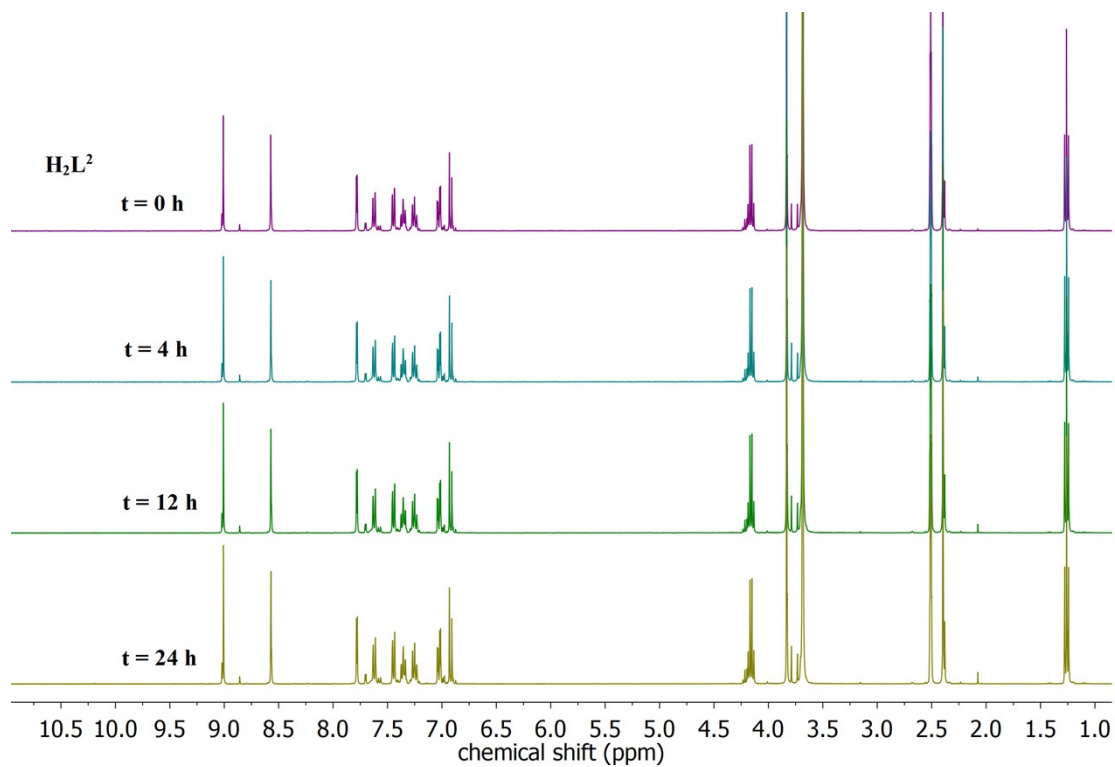

**Figure S32.**  $^1\text{H}$  NMR spectra of compound  $\text{Ni}^{\text{II}}\text{-L}^1$  at different periods of storage (0, 4, 12, and 24 h) in  $\text{DMSO-}d_6\text{:D}_2\text{O}$  solution (9:1) at 300 K.

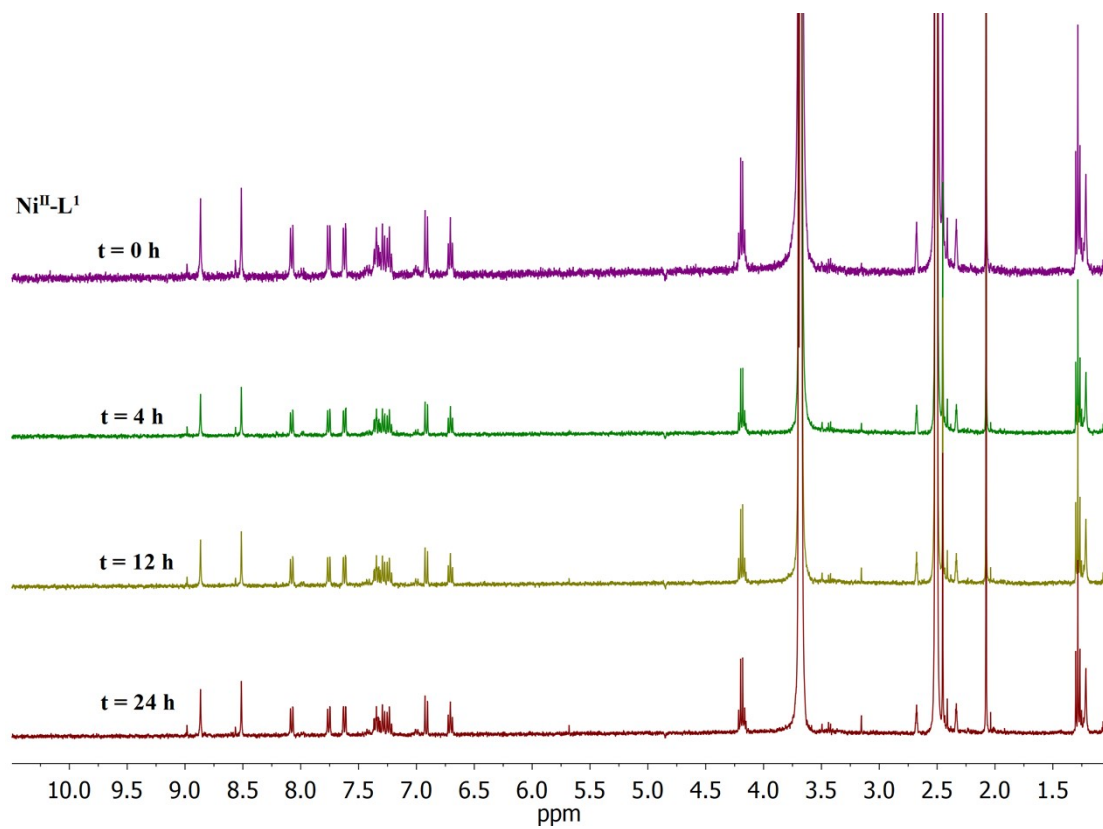

**Figure S33.**  $^1\text{H}$  NMR spectra of compound  $\text{Zn}^{\text{II}}\text{-L}^1$  at different periods of storage (0, 4, 12 and 24 h) in  $\text{DMSO-}d_6\text{:D}_2\text{O}$  solution (9:1) at 300 K.

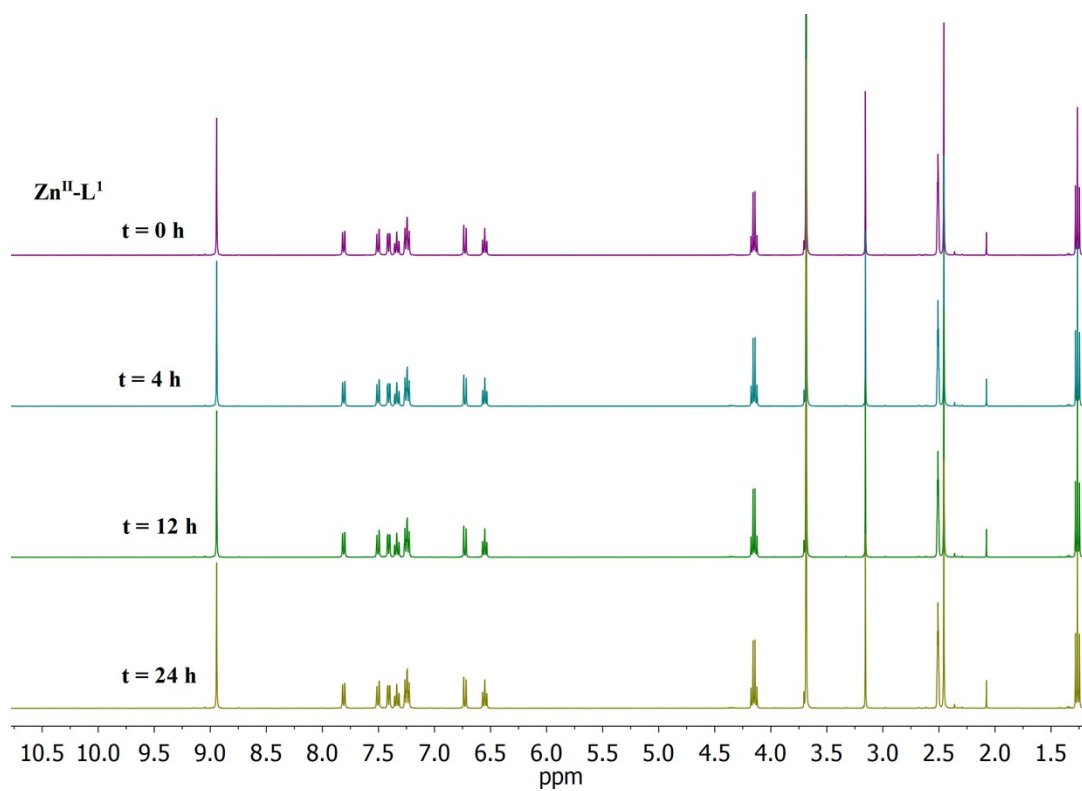

**Figure S34.**  $^1\text{H}$  NMR spectra of compound  $\text{Ni}^{\text{II}}\text{-L}^2$  at different periods of storage (0, 4, 12 and 24 h) in  $\text{DMSO-}d_6\text{:D}_2\text{O}$  solution (9:1) at 300 K.

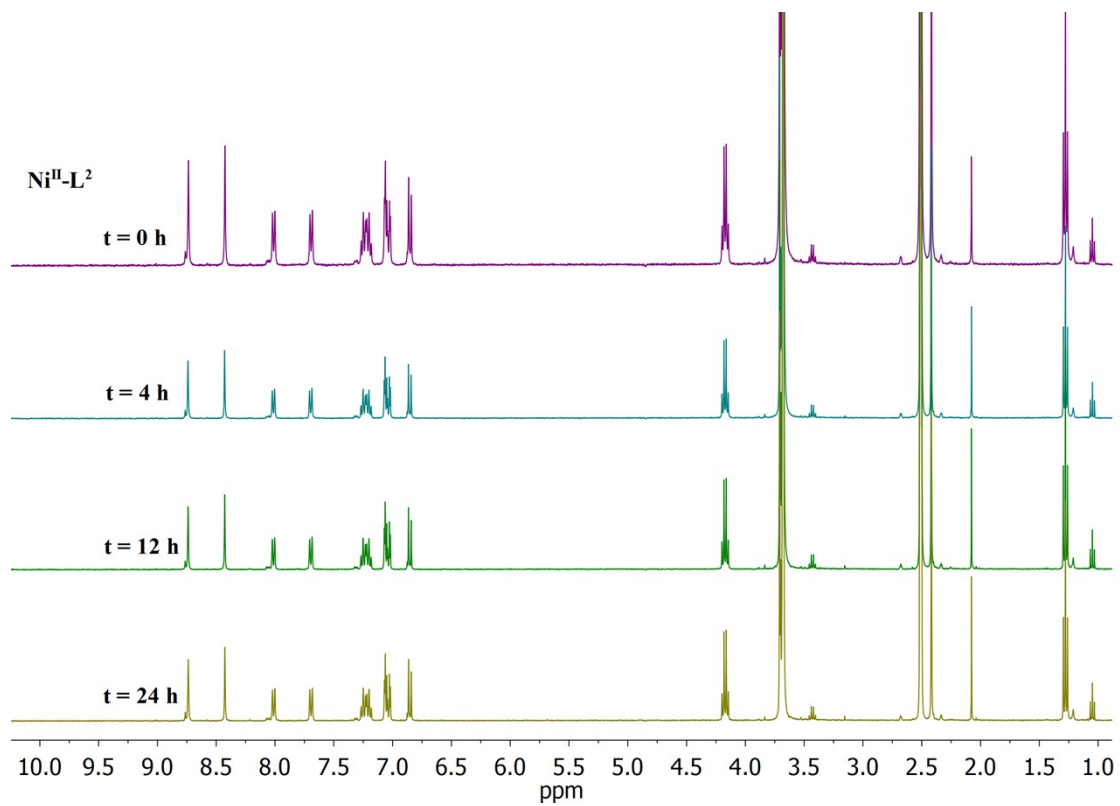



**Figure S35.**  $^1\text{H}$  NMR spectra of compound  $\text{Zn}^{\text{II}}\text{-L}^2$  at different periods of storage (0, 4, 12, and 24 h) in  $\text{DMSO-}d_6\text{:D}_2\text{O}$  solution (9:1) at 300 K.

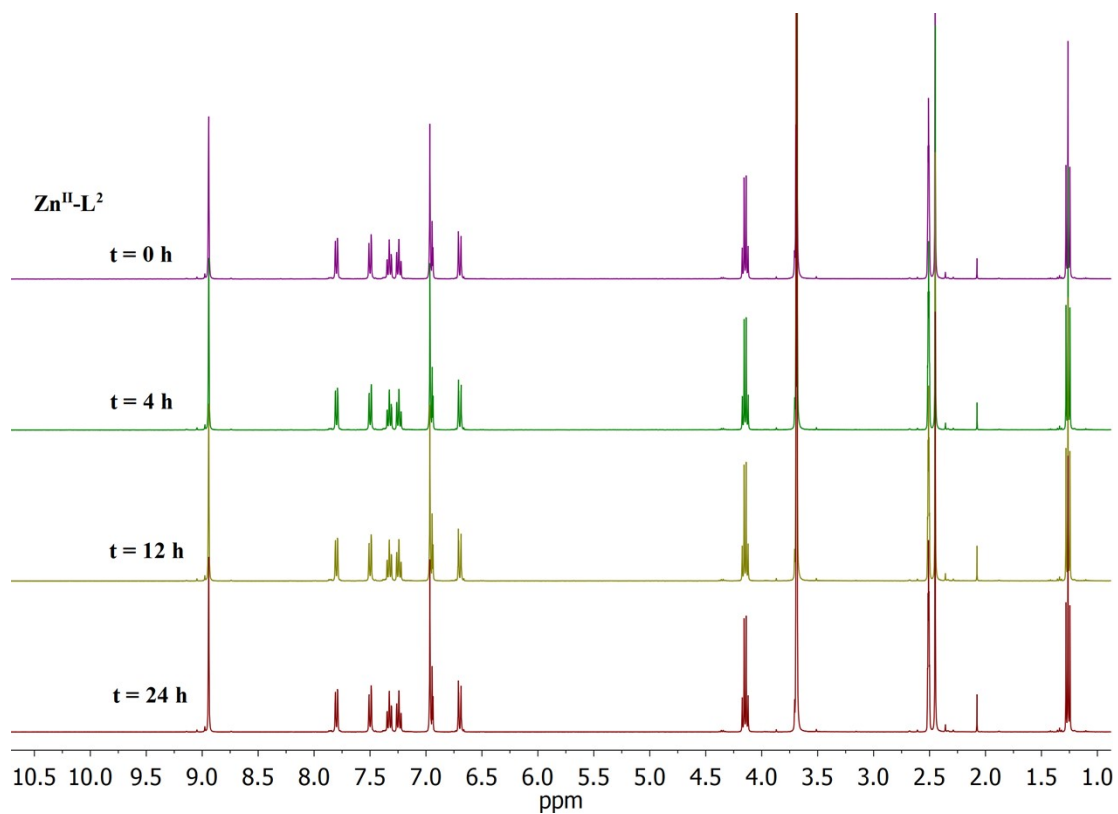

**Figure S36.** The absorption spectrum of a freshly prepared solution of  $\text{Ni}^{\text{II}}\text{-L}_1$  in a DMSO:Buffer solution (60:40) and absorption spectral changes after several storage periods. **A)** Contains spectra registered every 3 h, up to 24 h, and in order to ease the visualization, **B)** contains a selection of the spectra obtained for  $t = 0, 12,$  and  $24$  h.

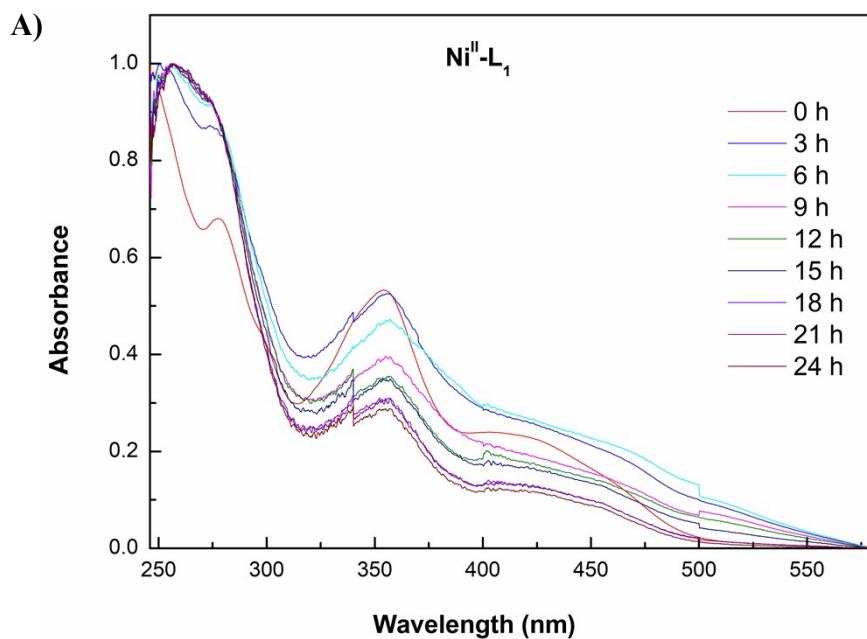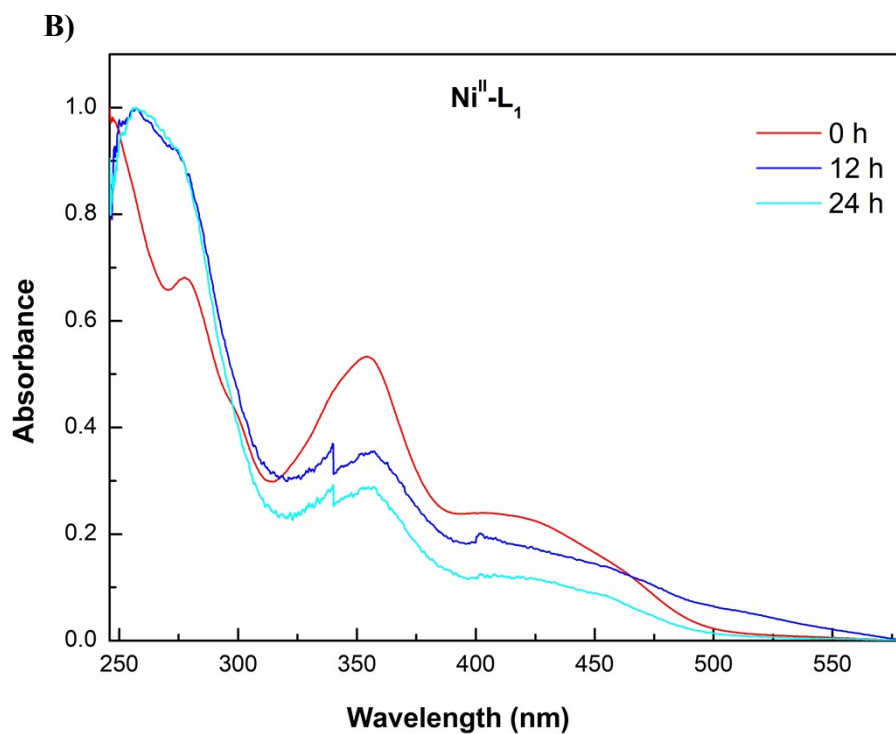

**Figure S37.** The absorption spectrum of a freshly prepared solution of  $\text{Ni}^{\text{II}}\text{-L}_2$  in a DMSO:Buffer solution (60:40) and absorption spectral changes after several storage periods. **A)** Contains spectra registered every 3 h, up to 24 h, and in order to ease the visualization, **B)** contains a selection of the spectra obtained for  $t = 0, 12,$  and  $24$  h.

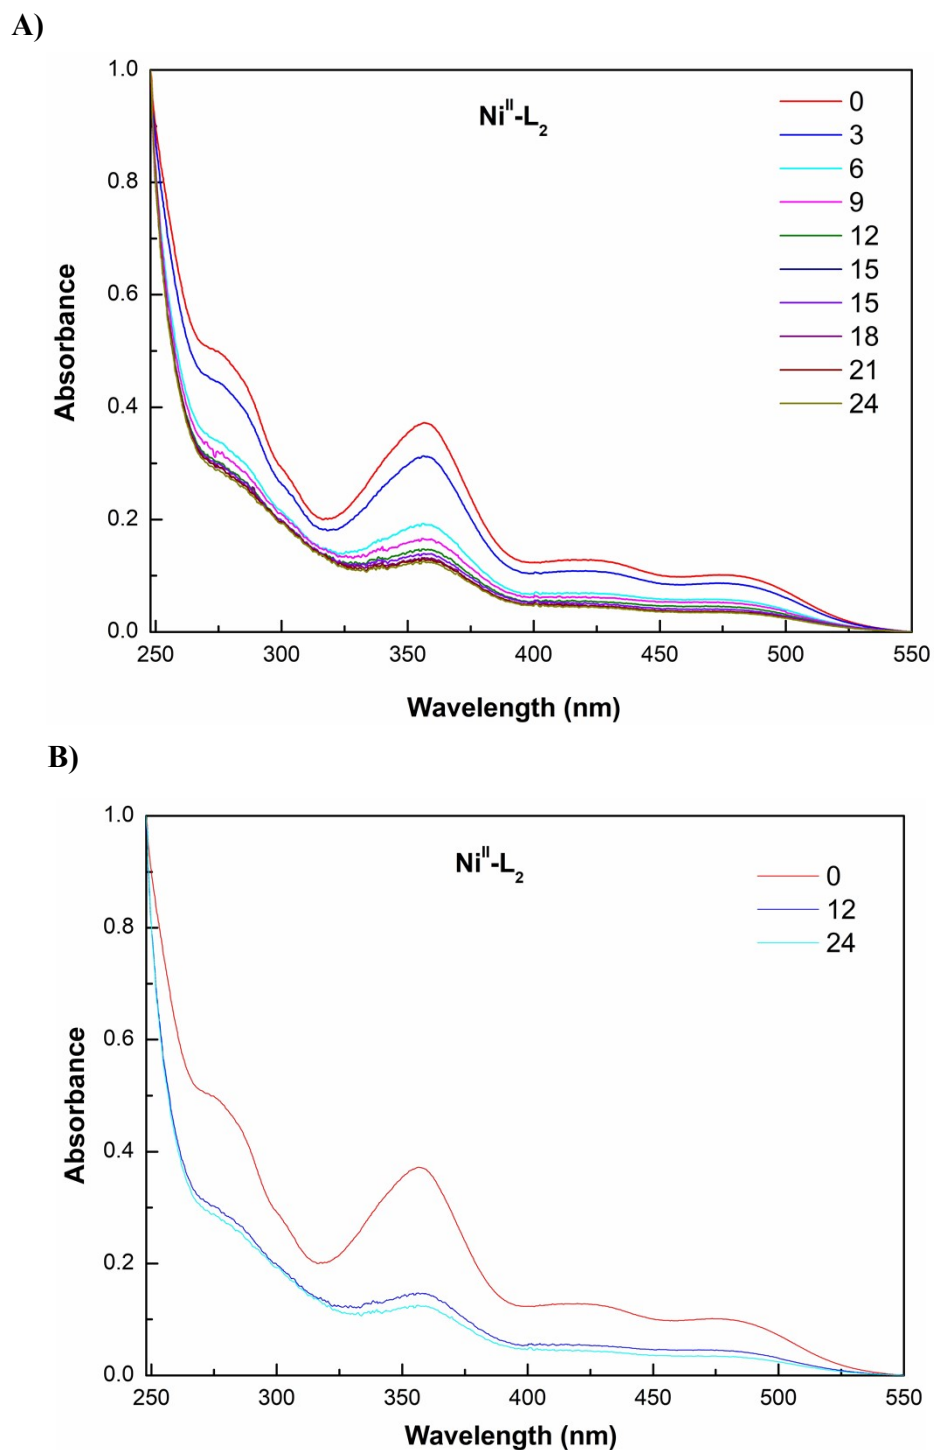

**Figure S38.** The absorption spectrum of a freshly prepared solution of  $\text{Zn}^{\text{II}}\text{-L}_1$  in a DMSO:Buffer solution (60:40) and absorption spectral changes after several storage periods. **A)** Contains spectra registered every 3 h, up to 24 h, and in order to ease the visualization, **B)** contains a selection of the spectra obtained for  $t = 0, 12,$  and  $24$  h.

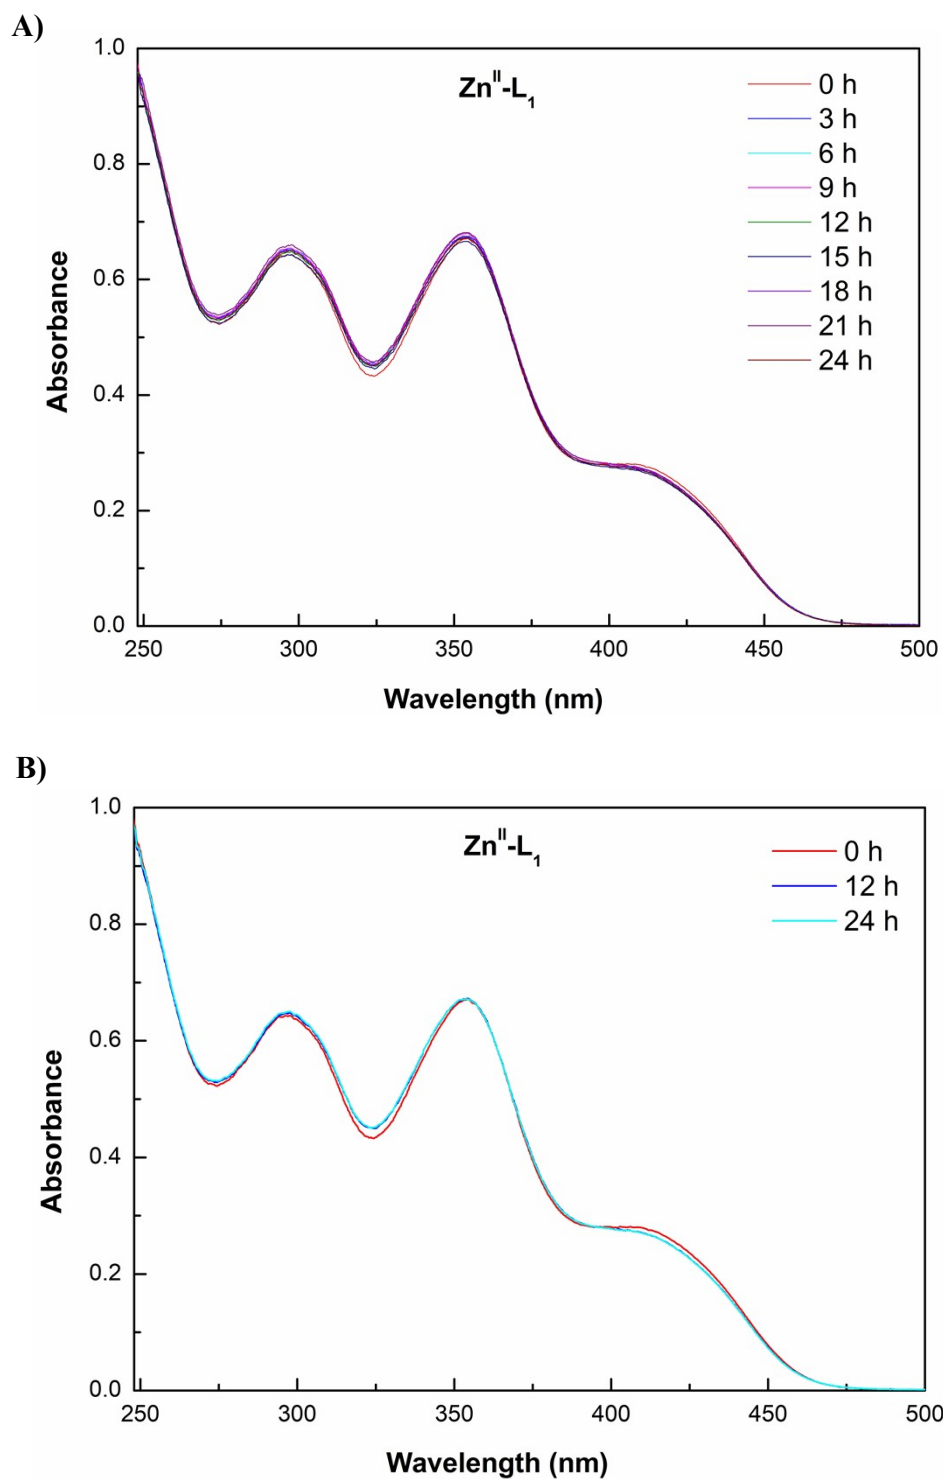

**Figure S39.** The absorption spectrum of a freshly prepared solution of  $\text{Zn}^{\text{II}}\text{-L}_2$  in a DMSO:Buffer solution (60:40) and absorption spectral changes after several storage periods. **A)** Contains spectra registered every 3 h, up to 24 h, and in order to ease the visualization, **B)** contains a selection of the spectra obtained for  $t = 0, 12,$  and  $24$  h.

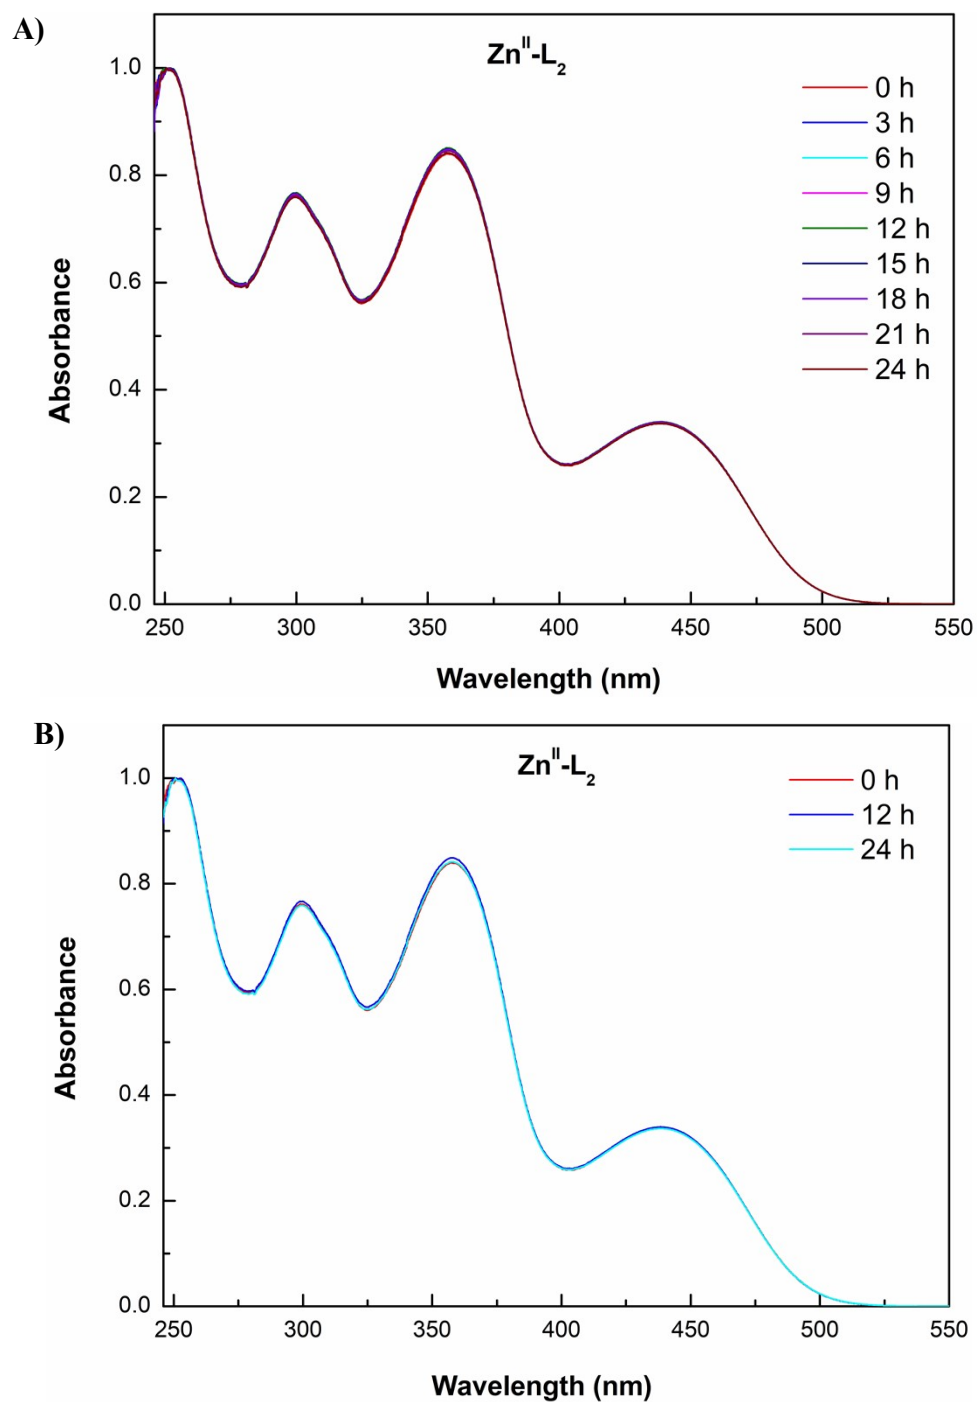

**Figure S40.** Intermolecular hydrogen bonds C5-H5 $\cdots$ O3 and C7-H7 $\cdots$ O3 of compound Ni<sup>II</sup>-L<sup>1</sup>.

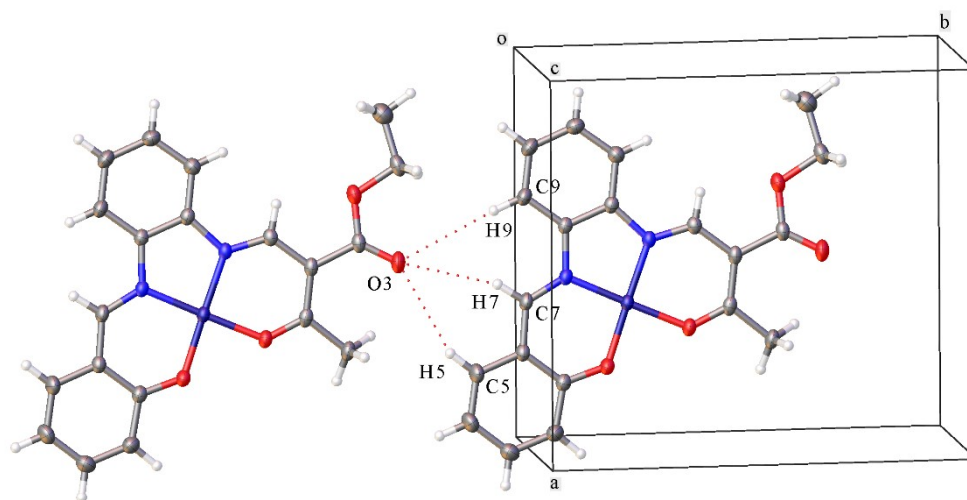

**Figure S41.** Intermolecular bifurcated hydrogen bond C19-H19A $\cdots$ O1 and C19-H19A $\cdots$ O2 of compound Ni<sup>II</sup>-L<sup>1</sup>.

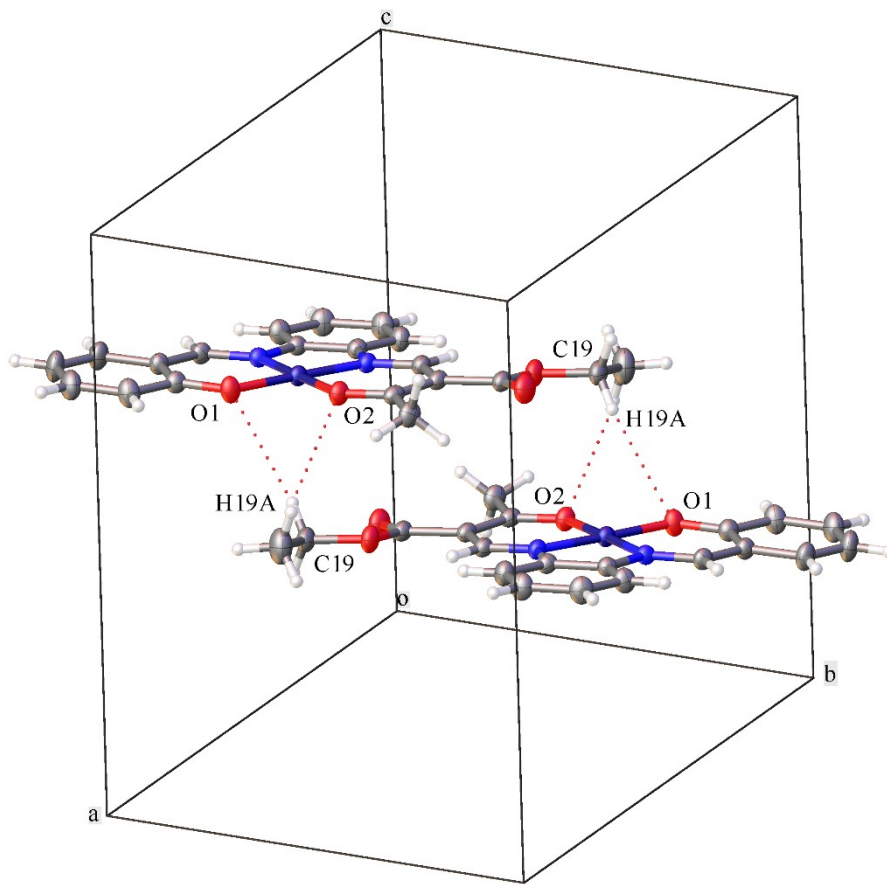

**Figure S42.** Intermolecular hydrogen bonds C21-H21C $\cdots$ O5 of compound Ni<sup>II</sup>-L<sup>2</sup>.

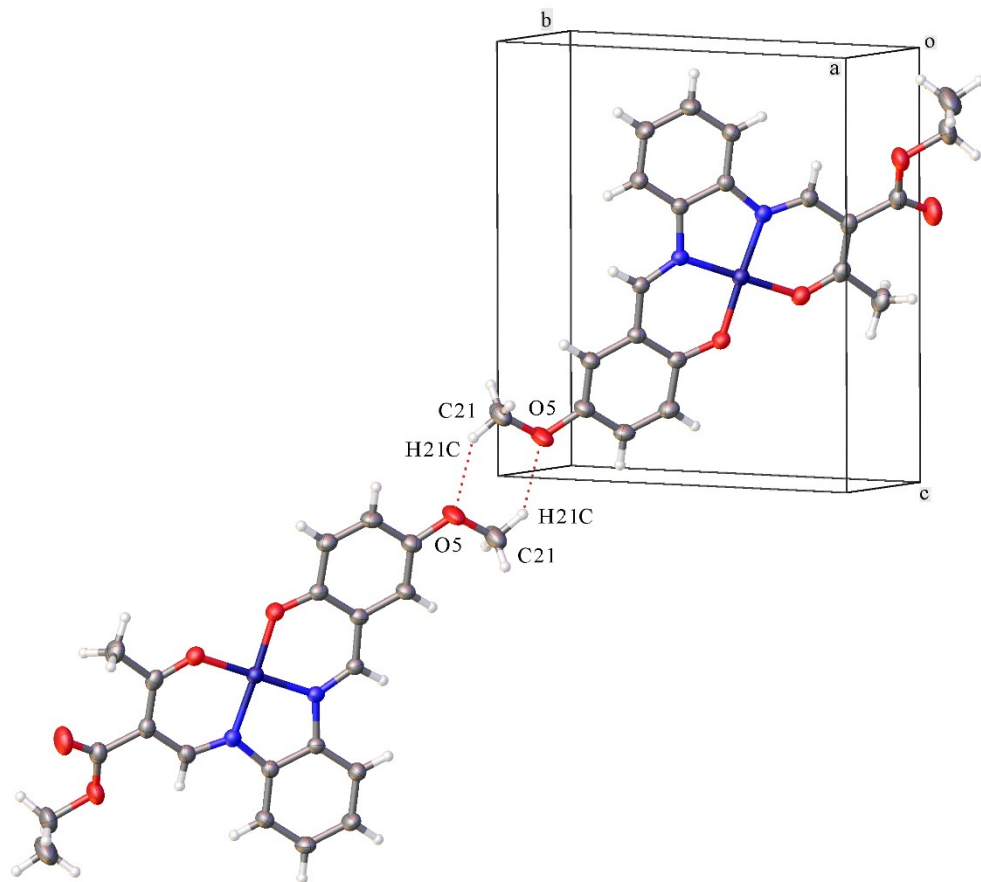



**Figure S43.** Intermolecular hydrogen bonds C19-H19B $\cdots$ O1 of compound Ni<sup>II</sup>-L<sup>2</sup>.

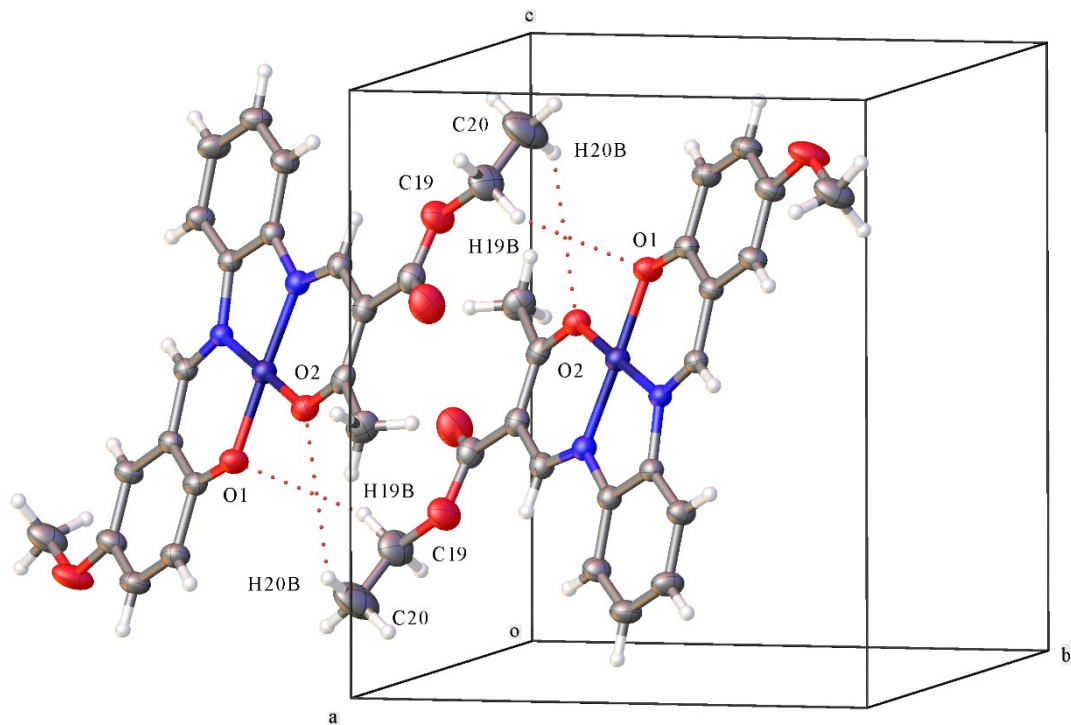

**Figure S44.** Cell viability assay on MG-63, HCT-116 and MDA-MB-231 cells after 24 of incubation with ligands ( $H_2L^1$  and  $H_2L^2$ ), Ni(II) complexes ( $Ni^{II}-L^1$  and  $Ni^{II}-L^2$ ) and Zn(II) complexes compound ( $Zn^{II}-L^1$  and  $Zn^{II}-L^2$ ). The results are expressed as the percentage of the basal level and represent the mean  $\pm$  the standard error of the mean (SEM) (n = 18). Asterisk significant difference in comparison with the basal level (p < 0.01).

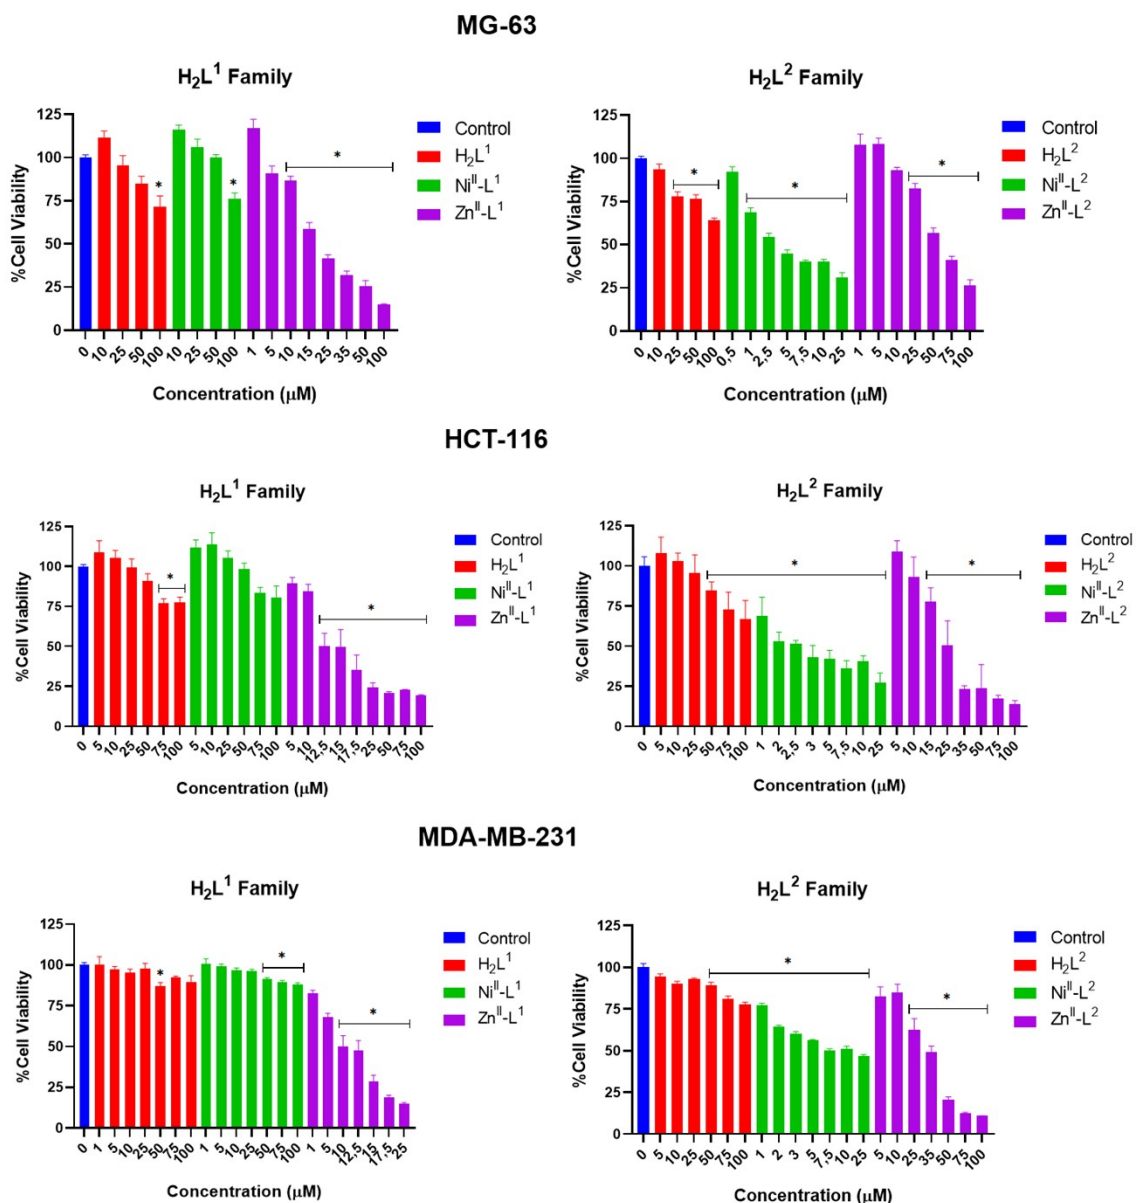

Supplement: d3dt00800b1.pdf [file d3dt00800b1.pdf]
